# Supplementary material for: Mechanistic insights of electrocatalytic CO2 reduction by Mn complexes: synergistic effects of the ligands
Source: Royal Society of Chemistry journal article supplement (doi:10.1039/d3dt03453d), 2023-12-18
Supplement: d3dt03453d1.pdf [file d3dt03453d1.pdf]

## Supporting Information

# Mechanistic insights of electrocatalytic CO<sub>2</sub> reduction by Mn complexes: synergistic effects of the ligands

Haitao Sun<sup>‡</sup>, Xueqing Liu<sup>‡</sup>, Yafeng Li, Fang Zhang, Xiuxiu Huang, Chuanzhi Sun\*, and Fang Huang\*

Department of Assets and Laboratory Management, College of Chemistry, Chemical Engineering and Materials Science, Shandong Normal University, Jinan 250014, P. R. China

### Corresponding Author

\*E-mail: fanghuang@sdu.edu.cn; suncz@sdu.edu.cn

<sup>‡</sup>These authors contributed equally to this work.

**Table S1.** Experimentally obtained and calculated carbonyl stretching vibration frequencies,  $\nu_{\text{CO}}$  ( $\text{cm}^{-1}$ ) of Mn complexes. The calculated values of  $\nu_{\text{CO}}$  have been scaled by 0.965.

| Species                                                                           | Calcd                              | Exptl                  |
|-----------------------------------------------------------------------------------|------------------------------------|------------------------|
| <b>Cat1</b><br>Mn(pyrox)(CO) <sub>3</sub> Br                                      | 2027, 1969, 1948                   | 2028, 1932, 1923       |
| <b>1dimer</b> <sub>Cat1</sub><br>[Mn(pyrox)(CO) <sub>3</sub> ] <sub>2</sub>       | 1981, 1947, 1925, 1903, 1886, 1881 | 1967, 1929, 1881, 1855 |
| <b>2</b> <sub>Cat1</sub><br>[Mn(pyrox)(CO) <sub>3</sub> ] <sup>-</sup>            | 1915, 1849, 1839                   | 1911, 1806             |
| <b>14</b> <sub>Cat1</sub><br>[Mn(pyrox)(CO) <sub>3</sub> (HCO <sub>3</sub> )<br>] | 2037, 1975, 1949, 1683, 1649       | 2037, 1940, 1914, 1689 |

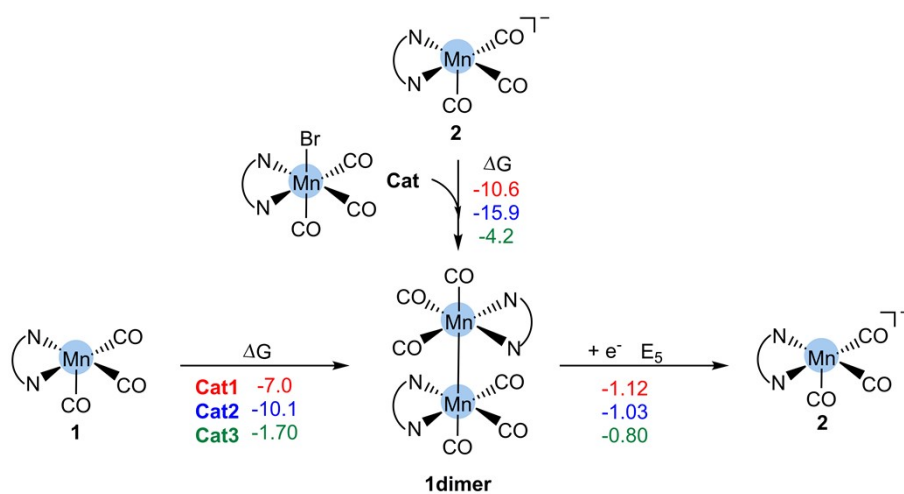

**Figure S1.** Gibbs free energies (kcal/mol) of **1dimer** formations and their reduction potentials (V vs. NHE).

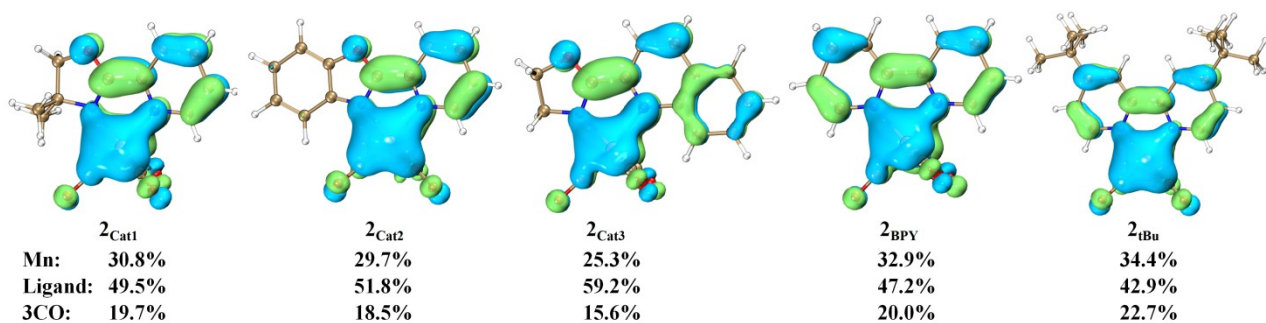

**Figure S2.** Plots of the highest occupied molecular orbitals (HOMO) of the active catalysts **2** together with orbital contributions of Mn atoms.

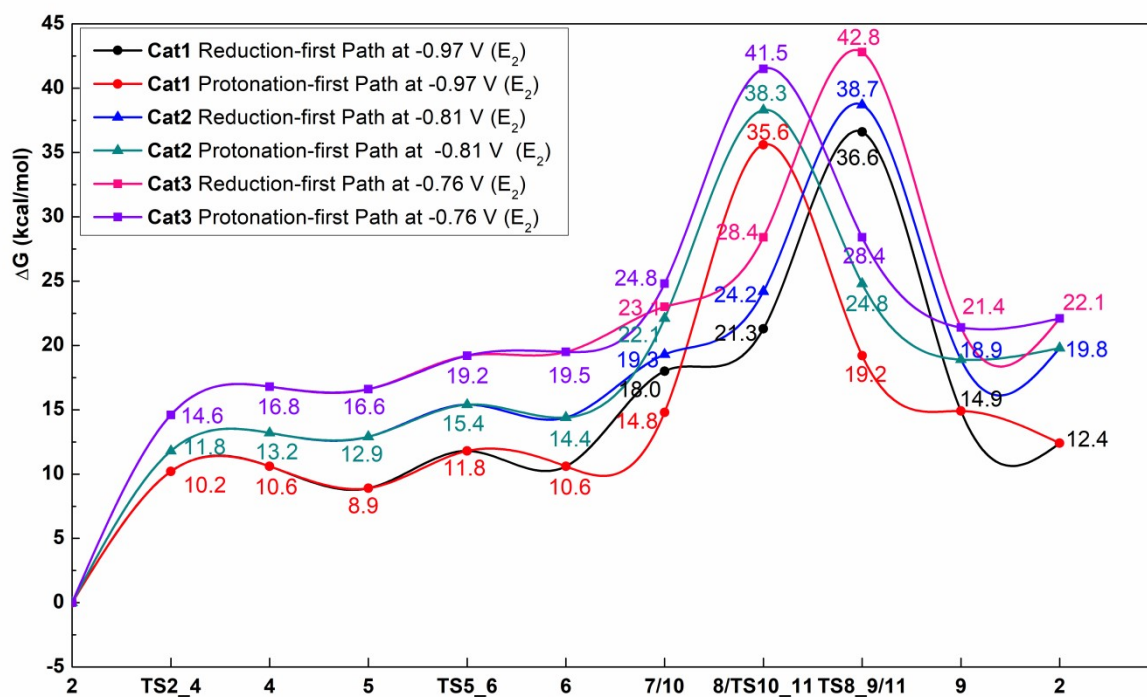

**Figure S3.** The free energy profiles for catalytic reduction of  $\text{CO}_2$  to  $\text{CO}$  when  $E_2$  was set as controlled potential.

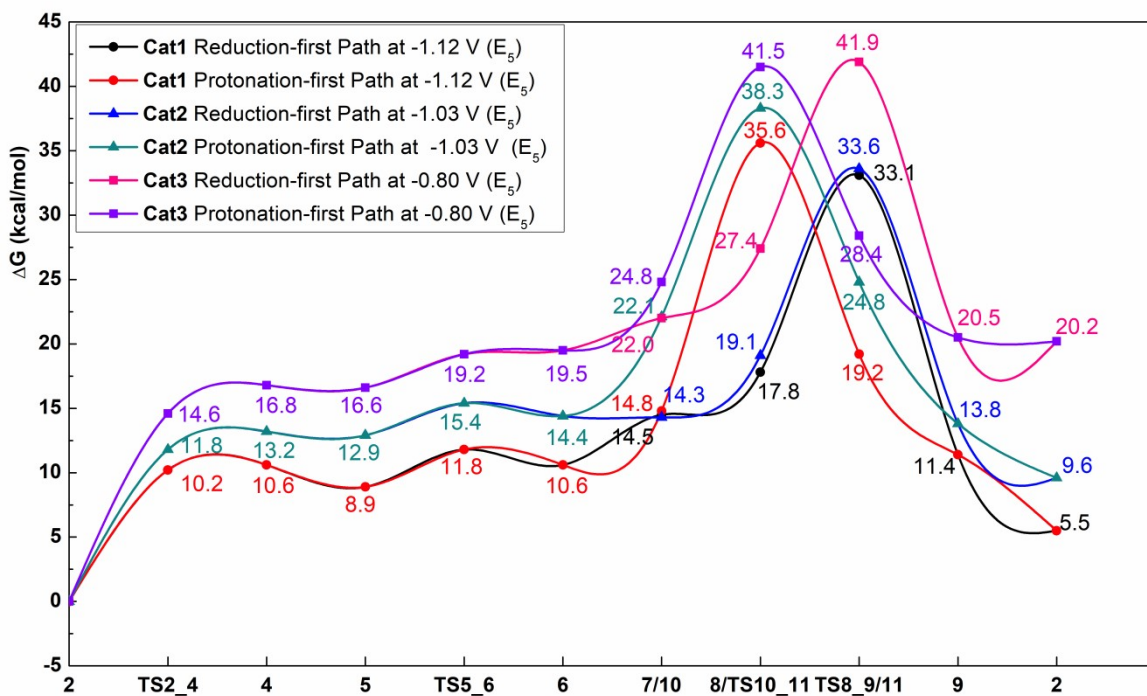

**Figure S4.** The free energy profiles for catalytic reduction of CO<sub>2</sub> to CO when E<sub>5</sub> was set as controlled potential.

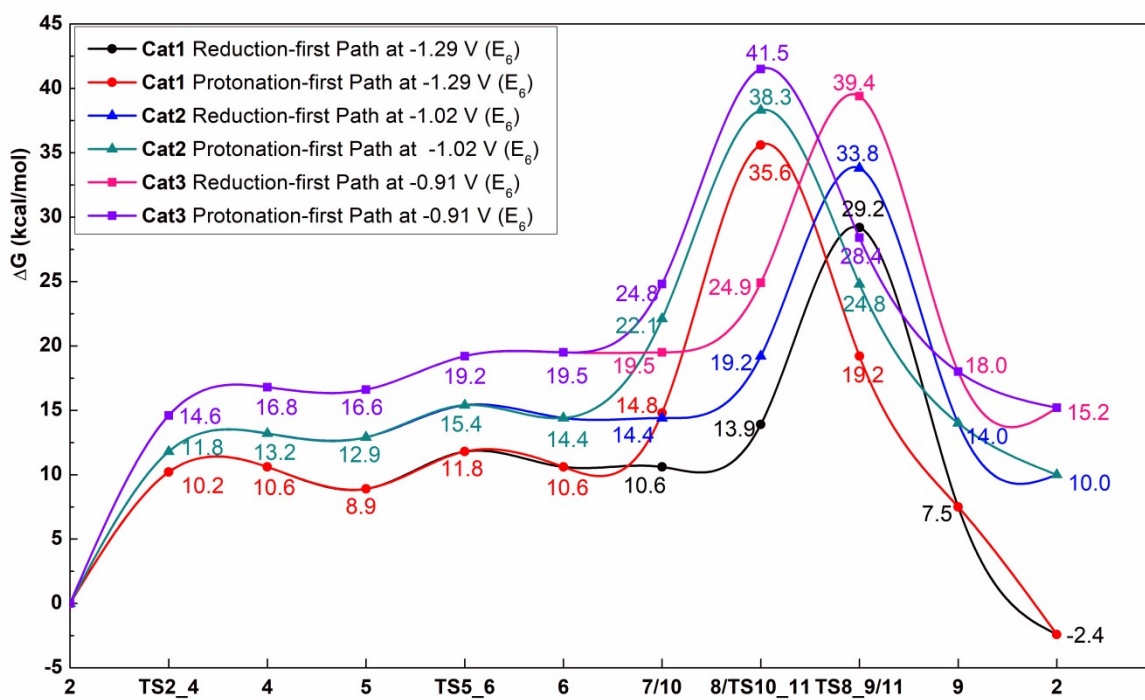

**Figure S5.** The free energy profiles for catalytic reduction of CO<sub>2</sub> to CO when E<sub>6</sub> was set as controlled potential.

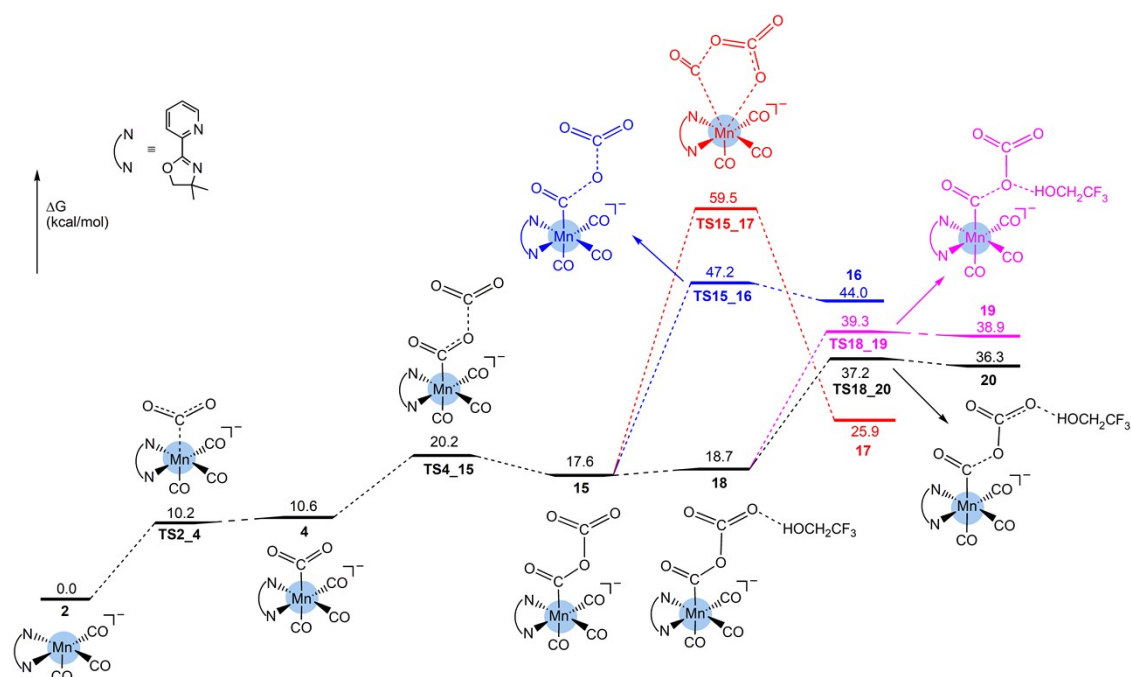

**Figure S6.** Calculated free energy profiles of the possible paths for the reaction of complex **2** with the second CO<sub>2</sub> molecule

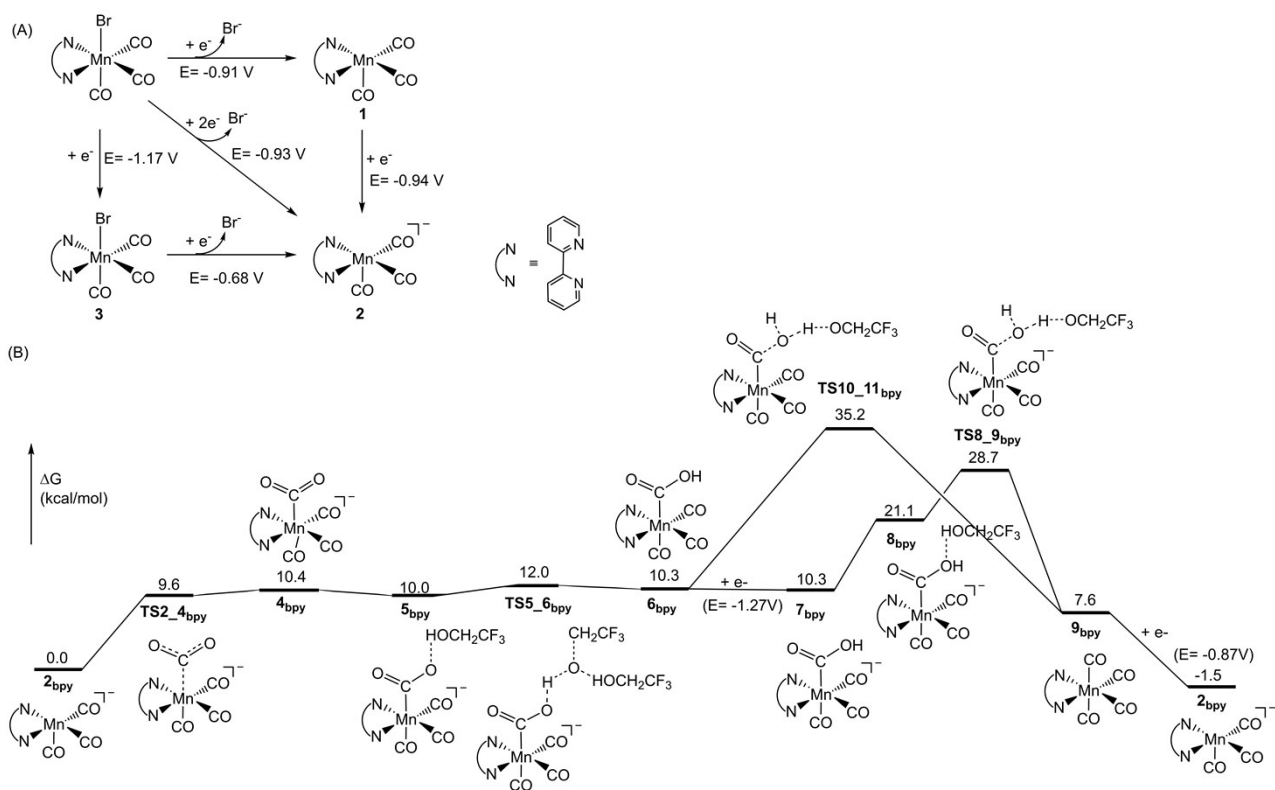

**Figure S7.** The free energy profile of **BPY** mediated CO<sub>2</sub> reduction under E<sub>6</sub> (-1.27 V).

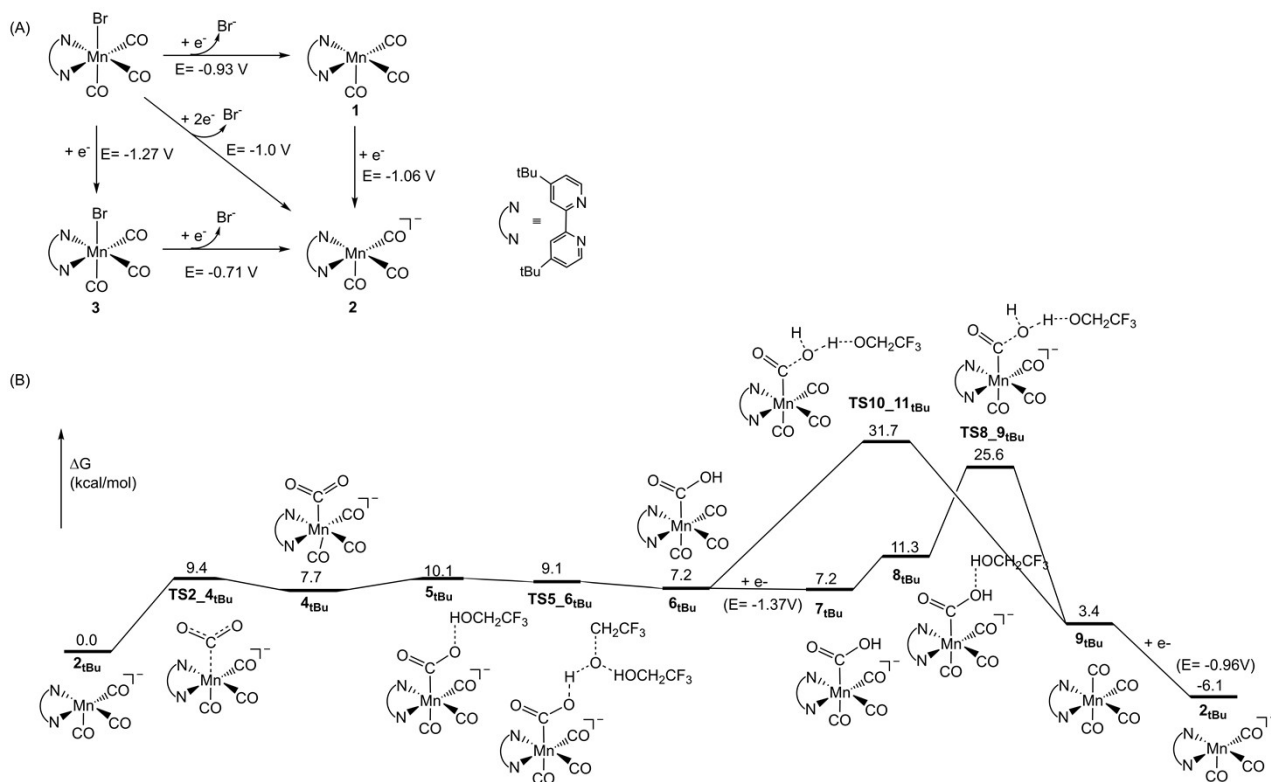

**Figure S8.** The free energy profile of  $2_{tBu}$  mediated  $CO_2$  reduction under  $E_6$  (-1.37 V).

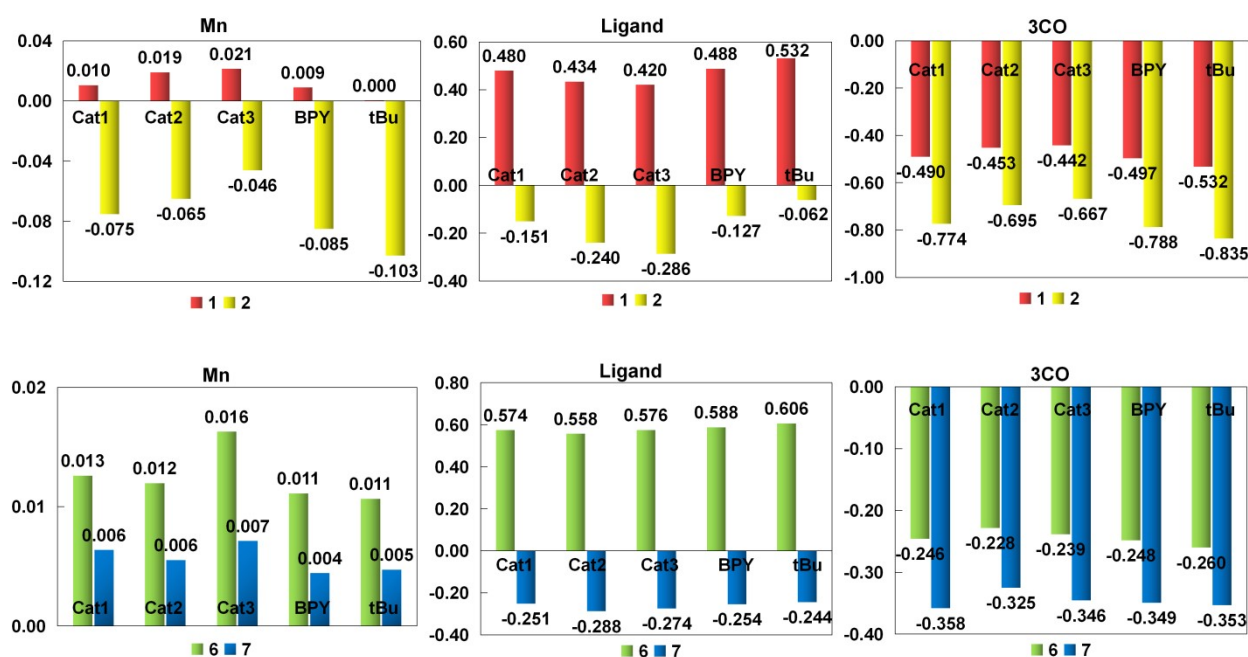

**Figure S9.** The Hirshfeld charges of Mn, heterocyclic ligand and three CO ligands for the two ligand-based reductions ( $1 \rightarrow 2$  and  $6 \rightarrow 7$ ).

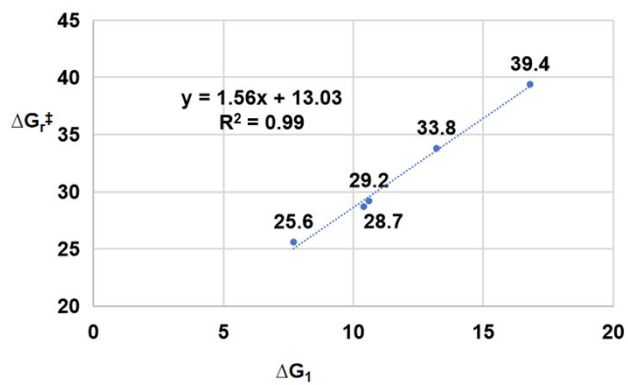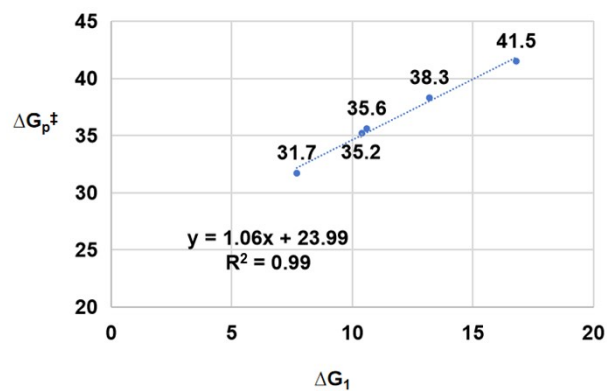

**Figure S10.** Linear relationships of  $\Delta G_{r}^{\ddagger}/\Delta G_1$  and  $\Delta G_{p}^{\ddagger}/\Delta G_1$ .

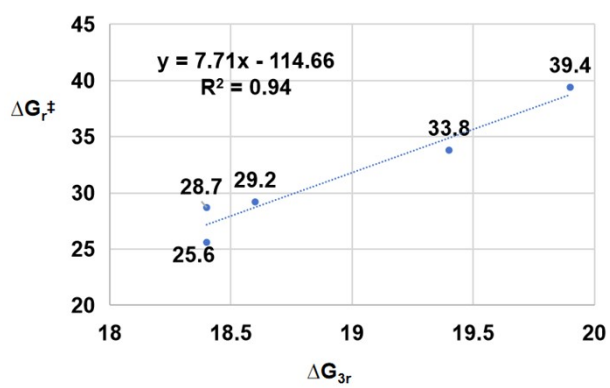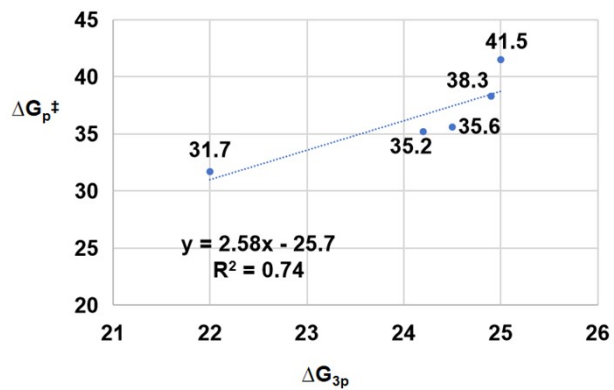

**Figure S11.** Linear relationships of  $\Delta G_{r}^{\ddagger}/\Delta G_{3r}$  and  $\Delta G_{p}^{\ddagger}/\Delta G_{3p}$ .

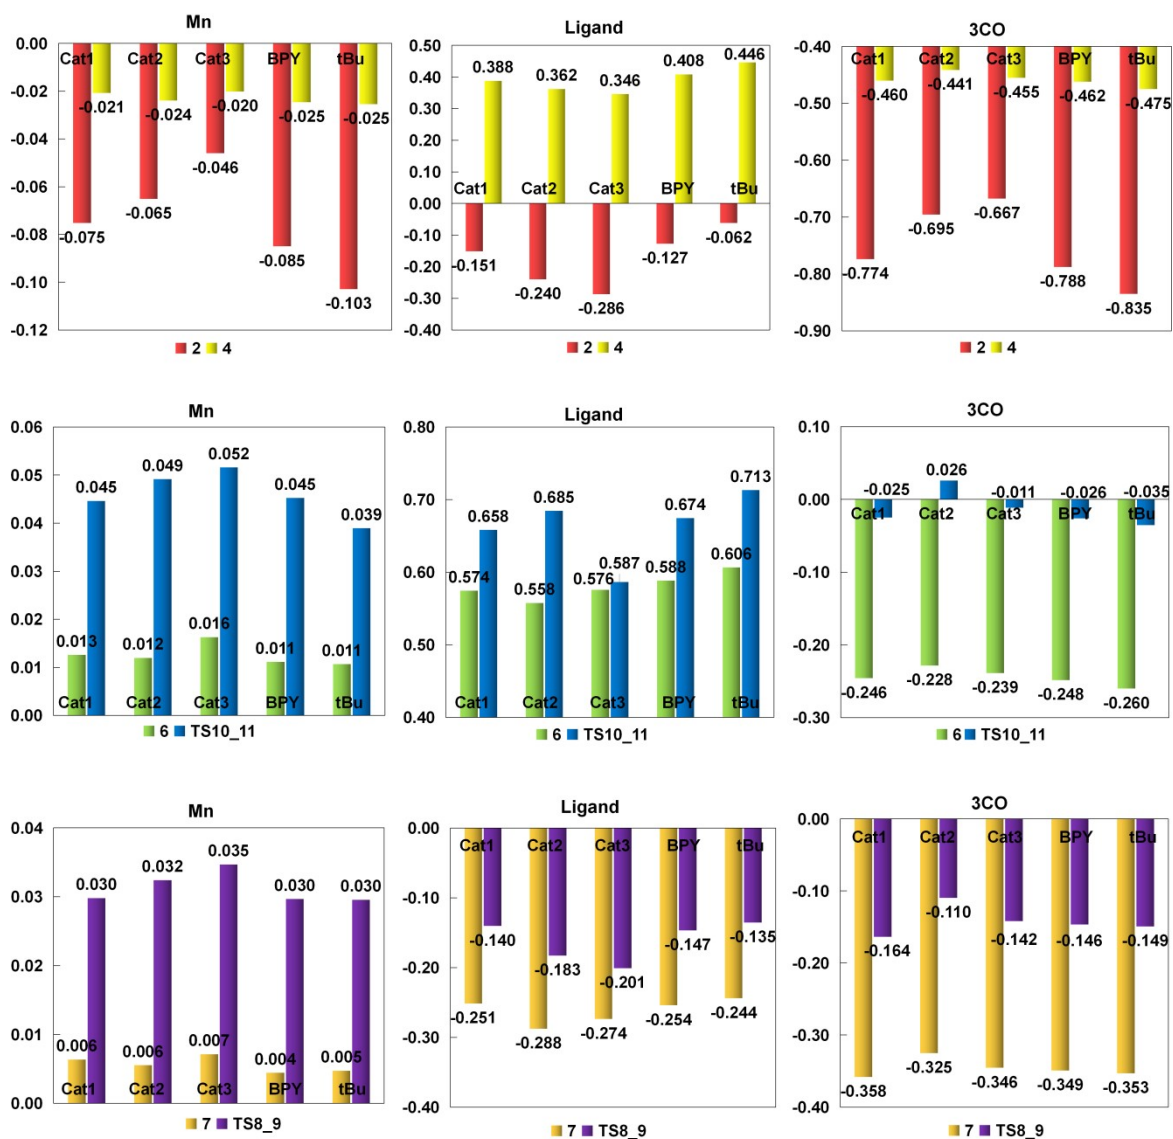

**Figure S12.** The Hirshfeld charges of Mn, heterocyclic ligand and three CO ligands for CO<sub>2</sub> activation (2→4) and C-O break (6→TS10\_11 and 7→TS8\_9).



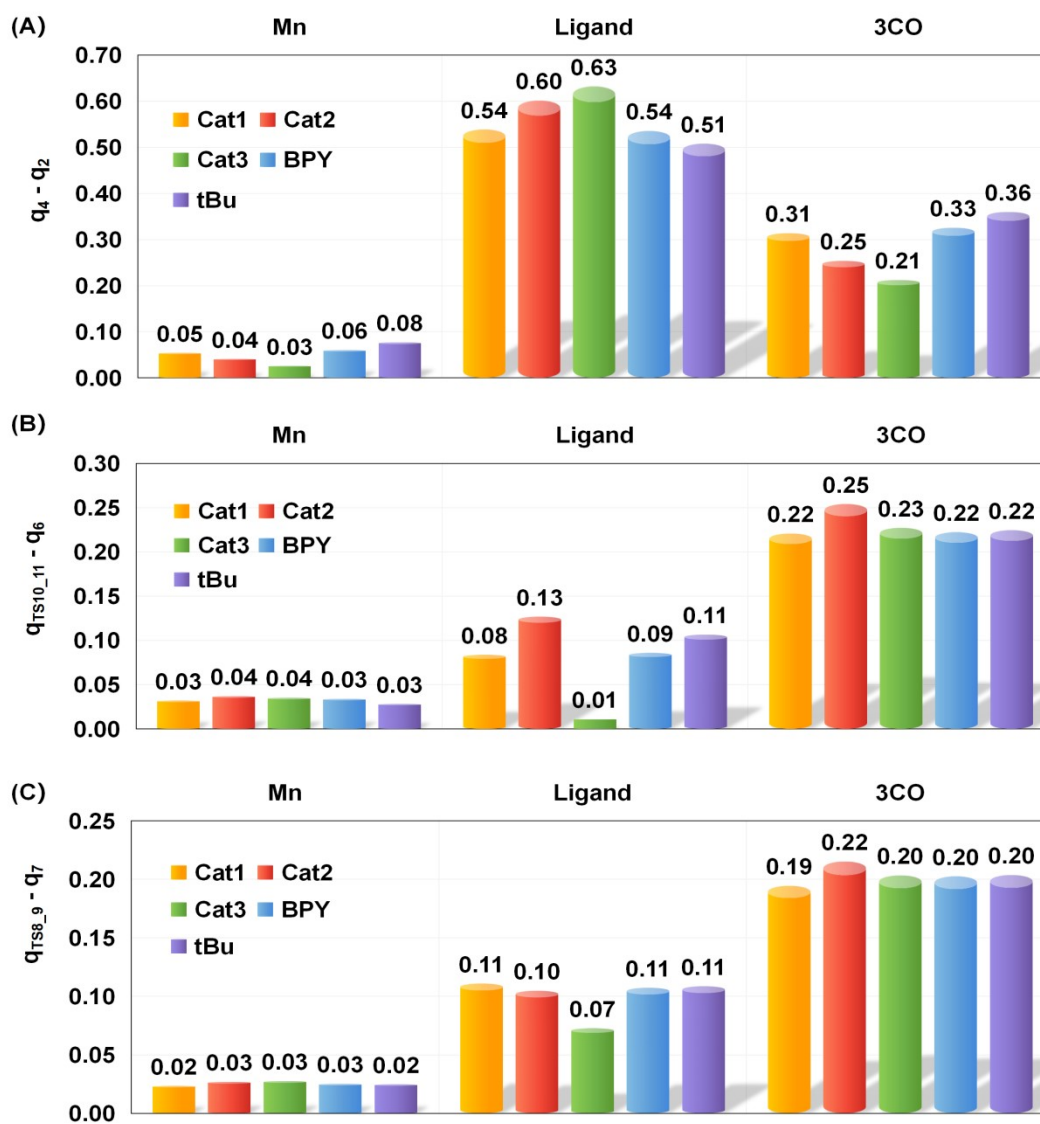

**Figure S13.** The changes of Hirshfeld charge of Mn, heterocyclic ligand and three CO ligands for  $\text{CO}_2$  activation  $2 \rightarrow 4$  (A) and C-O break  $6 \rightarrow \text{TS10\_11}$  (B) and  $7 \rightarrow \text{TS8\_9}$  (C).

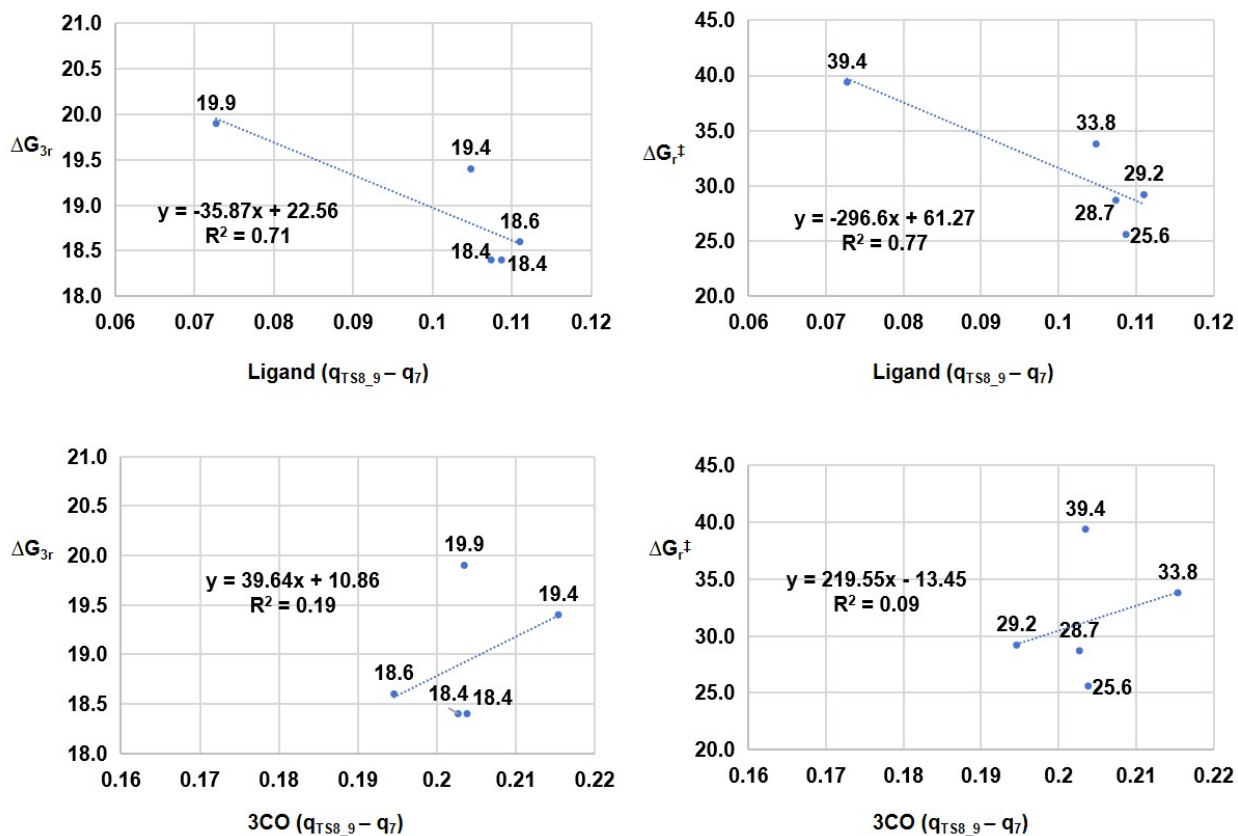

**Figure S14.** Linear relationships between  $\Delta G_{3r}/\Delta G_{r^\ddagger}$  and the transferred charges of Ligand/3CO from 7 to TS8\_9.

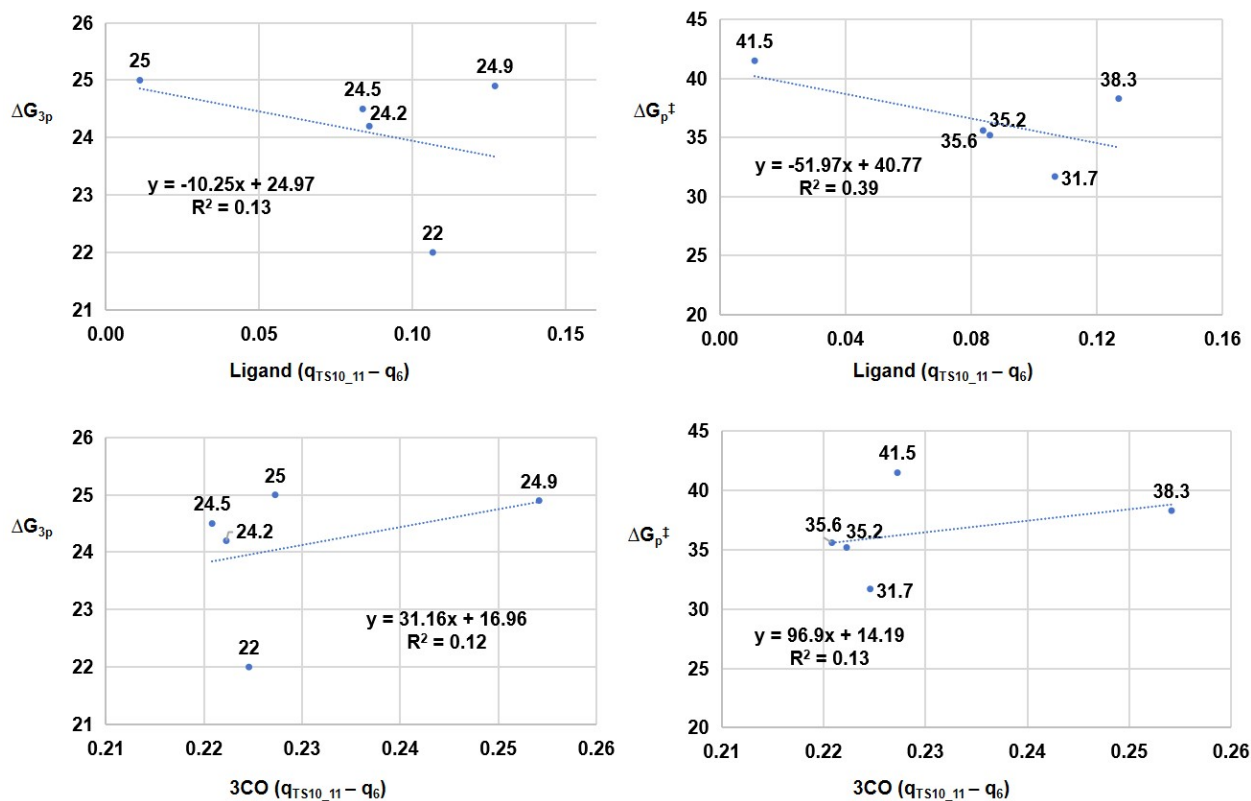

**Figure S15.** Linear relationships between  $\Delta G_{3p}/\Delta G_{p^\ddagger}$  and the transferred charges of Ligand/3CO from **6** to TS10\_11.

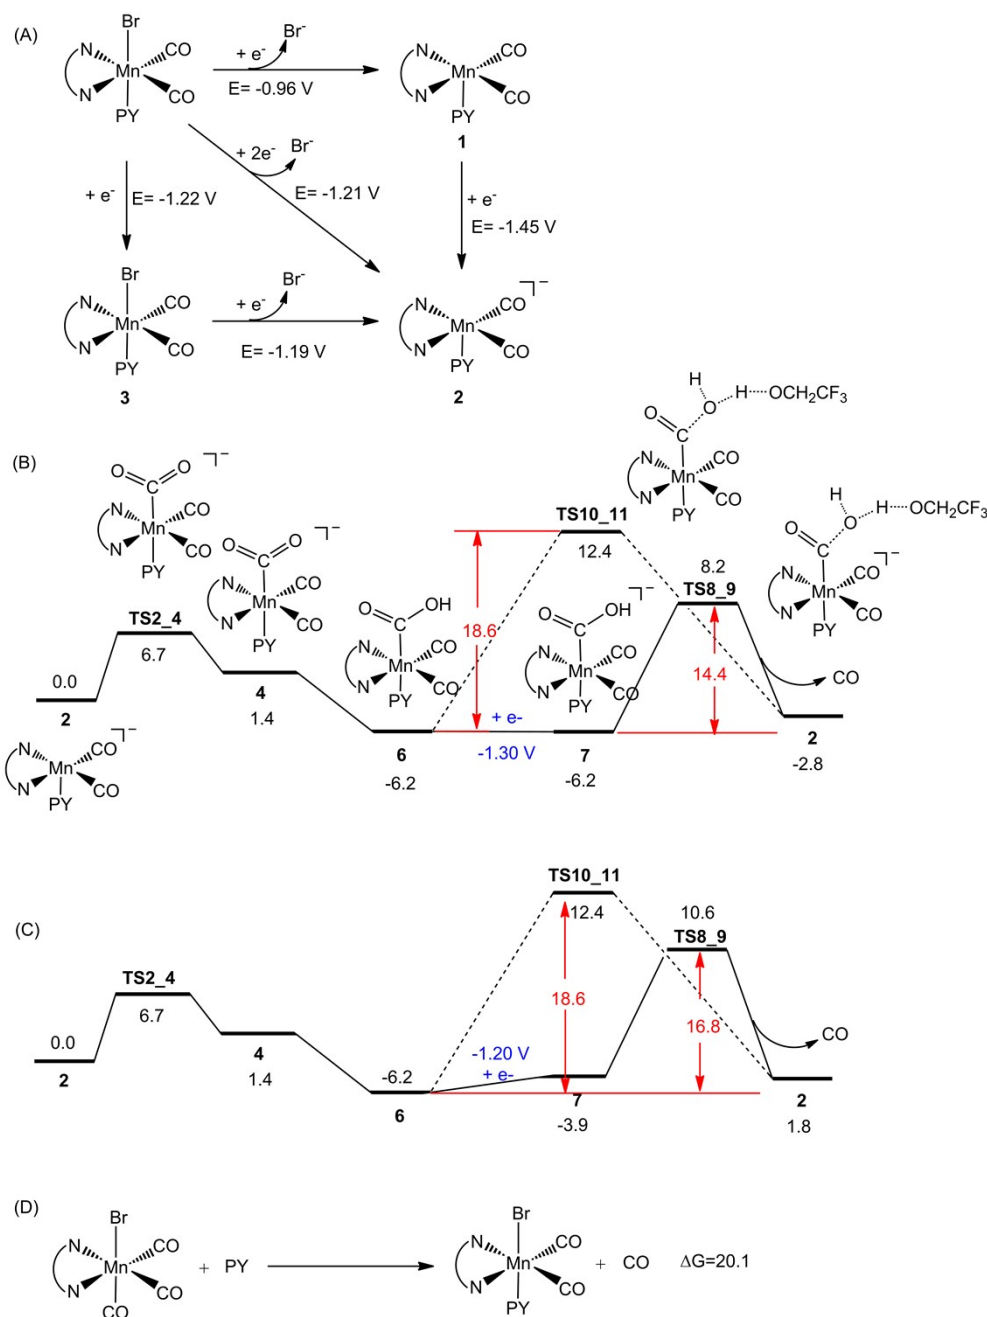

**Figure S16.** The catalytic mechanism of the Mn complex in which the axial CO ligand was replaced by one pyridine ligand. (A) the generation of active catalyst by two electrons reductions; (B) The free energy profile of CO<sub>2</sub> reduction under -1.30 V; (C) The free energy profile of CO<sub>2</sub> reduction under -1.20 V; (D) Thermodynamics for the substitution of axial CO by pyridine.

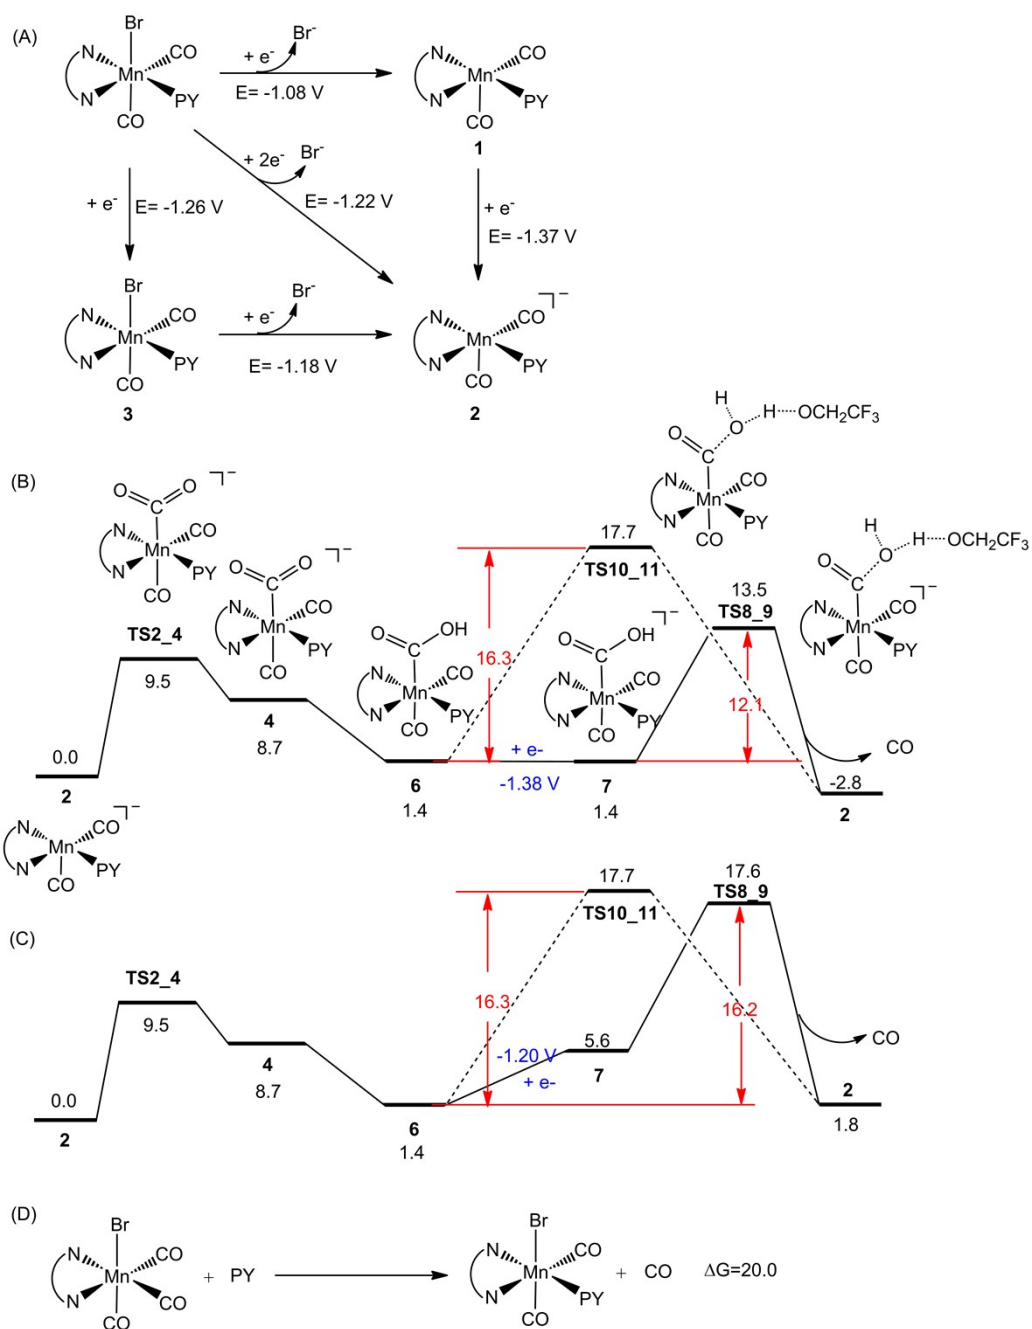

**Figure S17.** The catalytic mechanism of the Mn complex in which one of the latitudinal CO ligands was replaced by one pyridine ligand. (A) the generation of active catalyst by two electrons reductions; (B) The free energy profile of CO<sub>2</sub> reduction under -1.38 V; (C) The free energy profile of CO<sub>2</sub> reduction under -1.20 V; (D) Thermodynamics for the substitution of latitudinal CO by pyridine.

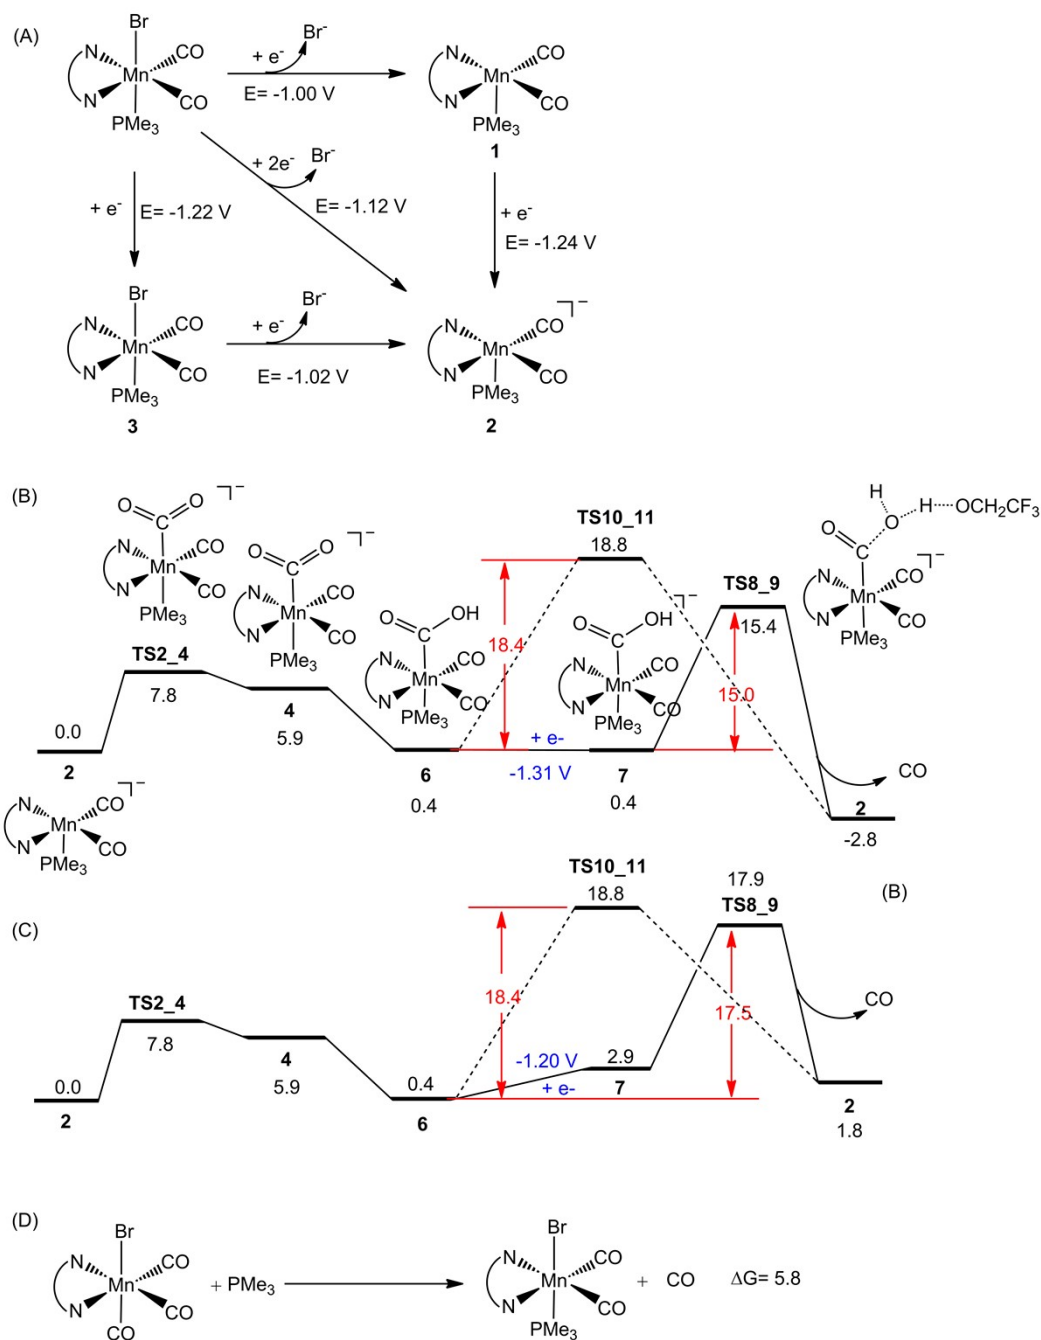

**Figure S18.** The catalytic mechanism of the Mn complex in which the axial CO ligand was replaced by  $\text{PMe}_3$  ligand. (A) the generation of active catalyst by two electrons reductions; (B) The free energy profile of  $\text{CO}_2$  reduction under  $-1.31$  V; (C) The free energy profile of  $\text{CO}_2$  reduction under  $-1.20$  V; (D) Thermodynamics for the substitution of axial CO by  $\text{PMe}_3$ .

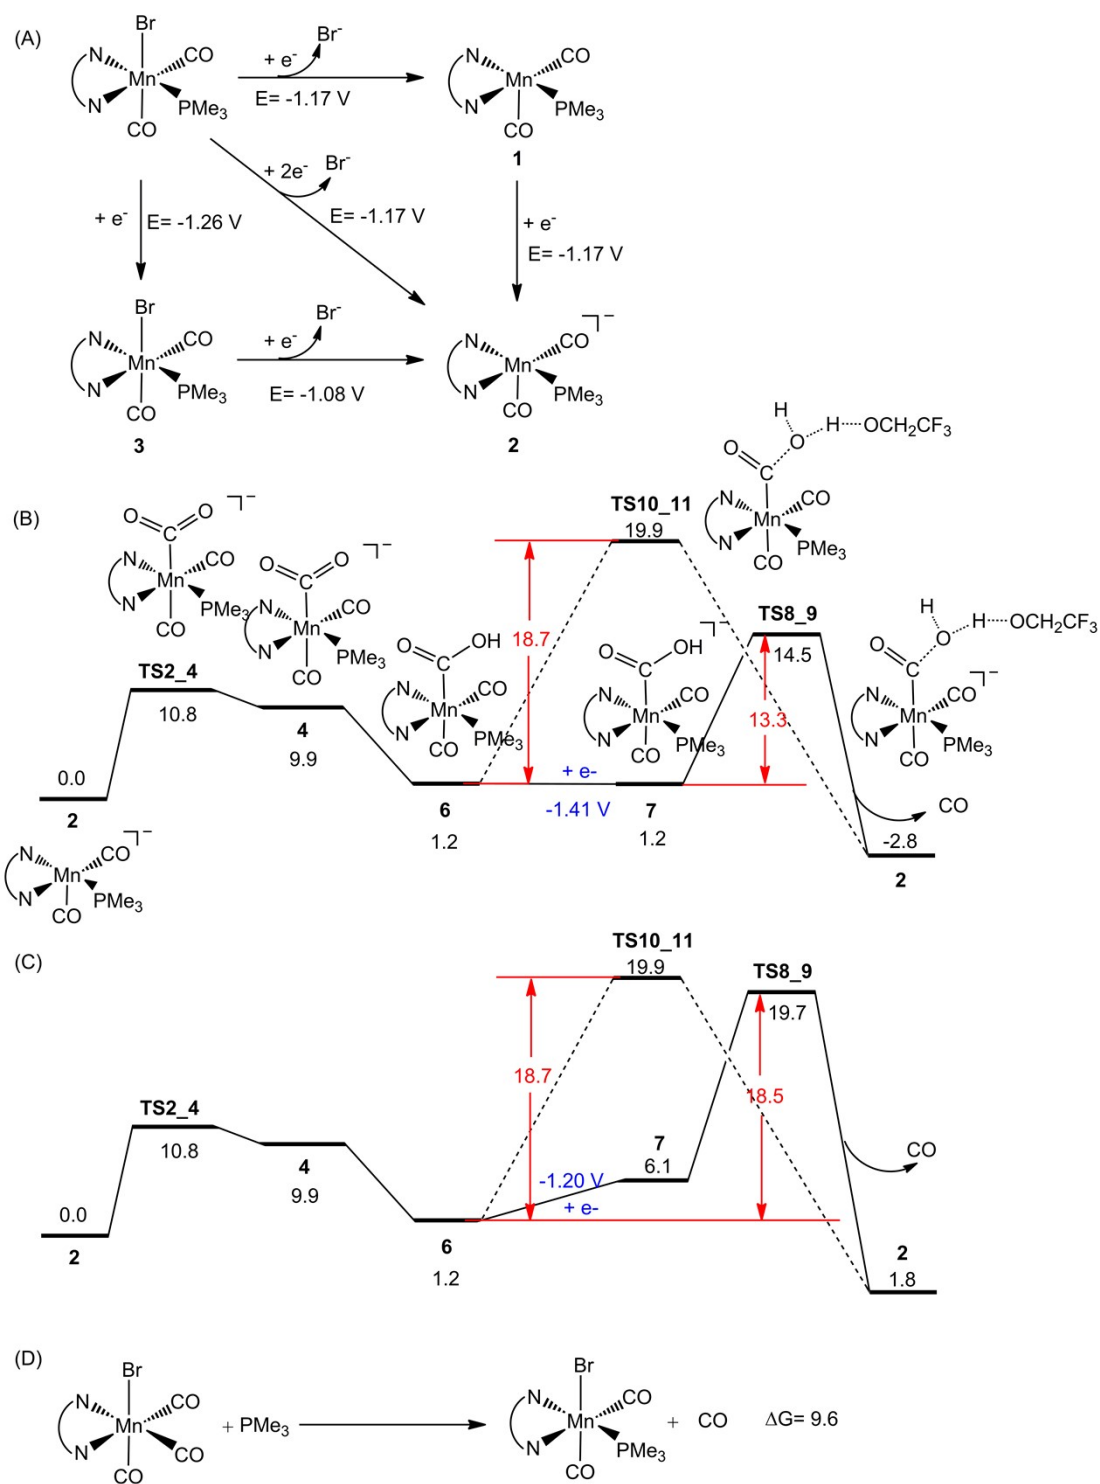

**Figure S19.** The catalytic mechanism of the Mn complex in which one of the latitudinal CO ligands was replaced by  $\text{PMe}_3$ . (A) the generation of active catalyst by two electrons reductions; (B) The free energy profile of  $\text{CO}_2$  reduction under  $-1.41\text{ V}$ ; (C) The free energy profile of  $\text{CO}_2$  reduction under  $-1.20\text{ V}$ ; (D) Thermodynamics for the substitution of latitudinal CO by  $\text{PMe}_3$ .

## Cartesian coordinates of all optimized structures

### CO<sub>2</sub>

|   |            |            |             |
|---|------------|------------|-------------|
| C | 0.00000000 | 0.00000000 | 0.00000000  |
| O | 0.00000000 | 0.00000000 | 1.16916900  |
| O | 0.00000000 | 0.00000000 | -1.16916900 |

### CO

|   |            |            |             |
|---|------------|------------|-------------|
| C | 0.00000000 | 0.00000000 | -0.64984200 |
| O | 0.00000000 | 0.00000000 | 0.48738200  |

### H<sub>2</sub>O

|   |            |             |             |
|---|------------|-------------|-------------|
| O | 0.00000000 | 0.00000000  | 0.11774000  |
| H | 0.00000000 | 0.76686000  | -0.47096100 |
| H | 0.00000000 | -0.76686000 | -0.47096100 |

### TFE

|   |             |             |             |
|---|-------------|-------------|-------------|
| C | -0.41331700 | 0.01698100  | 0.00000900  |
| C | 0.91597000  | 0.74788300  | -0.00006200 |
| F | -0.57235800 | -0.77492800 | 1.08850700  |
| F | -1.43693100 | 0.90942400  | -0.00004800 |
| F | -0.57237600 | -0.77508800 | -1.08837300 |
| O | 1.94241800  | -0.22671800 | -0.00009200 |
| H | 2.79732200  | 0.22479400  | 0.00044200  |
| H | 0.94116700  | 1.38253200  | -0.89324600 |
| H | 0.94123800  | 1.38256200  | 0.89309500  |

### TFE-OCH<sub>2</sub>CF<sub>3</sub>

|   |             |             |             |
|---|-------------|-------------|-------------|
| C | 2.53358400  | -0.33256500 | 0.01547400  |
| C | 1.93745000  | 0.88117100  | 0.72093400  |
| F | 3.43062000  | 0.00627700  | -0.95031800 |
| F | 3.19870000  | -1.14009600 | 0.89324500  |
| F | 1.59580100  | -1.10901500 | -0.59051300 |
| O | 1.27508800  | 1.72324300  | -0.15971000 |
| H | 0.17247000  | 1.65522300  | -0.02193100 |
| H | 1.28203000  | 0.48021700  | 1.51007400  |
| H | 2.78432000  | 1.38165700  | 1.21555700  |
| C | -2.56121600 | -0.29443700 | -0.01523700 |
| C | -1.79785300 | 0.82428600  | -0.72123400 |
| F | -3.50640900 | 0.16938900  | 0.85060300  |
| F | -3.22328100 | -1.09631400 | -0.90567800 |
| F | -1.75600100 | -1.11806700 | 0.71176100  |
| O | -1.13320000 | 1.64579500  | 0.15709300  |



|   |             |            |             |
|---|-------------|------------|-------------|
| H | -1.13495400 | 0.30368500 | -1.43948000 |
| H | -2.56563700 | 1.34661800 | -1.32479800 |

**[Mn(pyrox)(CO)<sub>3</sub>Br]**

**Cat1**

|    |             |             |             |
|----|-------------|-------------|-------------|
| Mn | 0.06451100  | -0.91461100 | 0.50252300  |
| N  | 0.94588100  | 0.93992600  | 0.09756700  |
| N  | -1.63291300 | 0.33729100  | 0.31920000  |
| C  | -2.92364700 | -0.00407400 | 0.44451600  |
| C  | -3.96447700 | 0.90987300  | 0.26254700  |
| C  | -3.66209100 | 2.23047000  | -0.06456700 |
| C  | -2.32170600 | 2.59799300  | -0.19662500 |
| C  | 0.08939700  | 1.87942300  | -0.09307300 |
| C  | -1.34717400 | 1.62363000  | 0.00206900  |
| H  | -3.13536100 | -1.03549200 | 0.69916700  |
| H  | -4.98990300 | 0.57747200  | 0.37816000  |
| H  | -4.44993300 | 2.96135100  | -0.21214500 |
| H  | -2.02877700 | 3.61058700  | -0.44782600 |
| C  | 0.14330700  | -0.65073500 | 2.27729800  |
| O  | 0.18798400  | -0.48893700 | 3.42250900  |
| C  | 1.59531400  | -1.88243500 | 0.48925400  |
| C  | -0.89501500 | -2.43844500 | 0.68759600  |
| O  | 2.55421400  | -2.52799100 | 0.47769100  |
| O  | -1.49849100 | -3.41898500 | 0.79437800  |
| Br | -0.10801500 | -1.30164600 | -2.07724800 |
| O  | 0.53703800  | 3.10952600  | -0.36800600 |
| C  | 1.99345900  | 2.99340000  | -0.45408600 |
| C  | 2.31371500  | 1.53491700  | 0.00223000  |
| H  | 2.27101000  | 3.18351400  | -1.49328200 |
| H  | 2.42244400  | 3.75830200  | 0.19434000  |
| C  | 3.16827100  | 0.80792000  | -1.04233100 |
| H  | 4.11080800  | 1.34870100  | -1.17850500 |
| H  | 3.40747800  | -0.20810400 | -0.72207500 |
| H  | 2.65113400  | 0.75755500  | -2.00375900 |
| C  | 2.97958000  | 1.50494900  | 1.38653200  |
| H  | 3.11951400  | 0.47608600  | 1.72902900  |
| H  | 3.96348300  | 1.98235500  | 1.33348600  |
| H  | 2.37553000  | 2.03981100  | 2.12594200  |

**1**

|    |             |             |             |
|----|-------------|-------------|-------------|
| Mn | -0.11468700 | 1.12242800  | -0.08722900 |
| N  | -0.89406700 | -0.77499500 | -0.05999500 |
| N  | 1.62081200  | -0.04302700 | -0.09932900 |

|   |             |             |             |
|---|-------------|-------------|-------------|
| C | 2.89955900  | 0.38240800  | -0.08842600 |
| C | 3.98502600  | -0.48927600 | -0.06206100 |
| C | 3.75659700  | -1.87053800 | -0.04112100 |
| C | 2.44218200  | -2.32886500 | -0.04143700 |
| C | -0.00280100 | -1.71666600 | -0.05407800 |
| C | 1.40908600  | -1.38893600 | -0.07051200 |
| H | 3.04905200  | 1.45557900  | -0.10097700 |
| H | 4.99120400  | -0.08529300 | -0.05932100 |
| H | 4.58509000  | -2.57053700 | -0.02163900 |
| H | 2.20561500  | -3.38646800 | -0.01800100 |
| C | 0.03633400  | 1.73368700  | 1.59063800  |
| O | 0.13736900  | 2.16899300  | 2.67021500  |
| C | -1.67841700 | 1.95196500  | -0.36965700 |
| C | 0.70493400  | 2.50269200  | -0.88737400 |
| O | -2.68078100 | 2.52773700  | -0.54012500 |
| O | 1.23451700  | 3.41230500  | -1.39739000 |
| O | -0.42207200 | -2.99069100 | -0.02241800 |
| C | -1.87381700 | -2.92854600 | 0.13528300  |
| C | -2.24043400 | -1.42518800 | -0.06056300 |
| H | -2.31512500 | -3.58688200 | -0.61401500 |
| H | -2.10650000 | -3.29567200 | 1.13811800  |
| C | -2.92411600 | -1.19043200 | -1.41691000 |
| H | -3.88789600 | -1.70997300 | -1.44028900 |
| H | -3.10390600 | -0.12606800 | -1.58457500 |
| H | -2.30587200 | -1.57163100 | -2.23582300 |
| C | -3.10051500 | -0.90775300 | 1.09805500  |
| H | -3.35336800 | 0.14606800  | 0.96014100  |
| H | -4.03480300 | -1.47725300 | 1.14654600  |
| H | -2.57749200 | -1.02047200 | 2.05253300  |

## 2

|    |             |             |             |
|----|-------------|-------------|-------------|
| Mn | -0.11061500 | 1.09930400  | -0.00194900 |
| N  | -0.89405500 | -0.73777600 | 0.00620900  |
| N  | 1.56529200  | -0.05311500 | -0.04057500 |
| C  | 2.86338500  | 0.36326700  | -0.03847800 |
| C  | 3.94598200  | -0.49123100 | -0.03773200 |
| C  | 3.72497900  | -1.89952400 | -0.03085400 |
| C  | 2.42841300  | -2.36080000 | -0.02227700 |
| C  | -0.01238000 | -1.73148300 | -0.01061300 |
| C  | 1.35522000  | -1.43088500 | -0.02645100 |
| H  | 3.00611300  | 1.43921900  | -0.03755700 |
| H  | 4.95057600  | -0.08134100 | -0.04168400 |
| H  | 4.56220500  | -2.59073900 | -0.02839100 |
| H  | 2.20159900  | -3.42237900 | -0.01060200 |

|   |             |             |             |
|---|-------------|-------------|-------------|
| C | 0.29688700  | 1.94895900  | 1.48038400  |
| O | 0.58536100  | 2.59089100  | 2.42942100  |
| C | -1.67721300 | 1.92908200  | -0.17805500 |
| C | 0.58455700  | 2.22558100  | -1.17155000 |
| O | -2.68733400 | 2.51989400  | -0.30806600 |
| O | 1.05828500  | 3.00672700  | -1.91983400 |
| O | -0.52233900 | -3.00795400 | -0.02774200 |
| C | -1.92201800 | -2.85033900 | 0.30142000  |
| C | -2.25070100 | -1.36572800 | -0.01671100 |
| H | -2.49543200 | -3.56386100 | -0.29355000 |
| H | -2.05250200 | -3.07147200 | 1.36800200  |
| C | -2.86449200 | -1.22155200 | -1.42132900 |
| H | -3.84461800 | -1.71064100 | -1.45914000 |
| H | -2.99263400 | -0.16694600 | -1.67821900 |
| H | -2.21894400 | -1.68374700 | -2.17571500 |
| C | -3.18214400 | -0.78626800 | 1.05352300  |
| H | -3.45635400 | 0.24593200  | 0.82831400  |
| H | -4.10391000 | -1.37777900 | 1.10225000  |
| H | -2.70401300 | -0.81353300 | 2.03770000  |

### 3

|    |             |             |             |
|----|-------------|-------------|-------------|
| Mn | -0.01162900 | -0.81356300 | 0.60986400  |
| N  | 1.06528400  | 0.80813300  | -0.06380400 |
| N  | -1.54593900 | 0.54870100  | 0.30952900  |
| C  | -2.87057100 | 0.40017200  | 0.51962500  |
| C  | -3.80811000 | 1.39694800  | 0.29582900  |
| C  | -3.36209000 | 2.66565300  | -0.18010700 |
| C  | -2.01565900 | 2.85612400  | -0.39794300 |
| C  | 0.29147700  | 1.85382500  | -0.30366000 |
| C  | -1.10727000 | 1.79254800  | -0.15176600 |
| H  | -3.18997300 | -0.57150300 | 0.88348300  |
| H  | -4.85788900 | 1.19844400  | 0.48151700  |
| H  | -4.07128700 | 3.46687200  | -0.36467100 |
| H  | -1.62773600 | 3.80473700  | -0.75557700 |
| C  | 0.14473300  | -0.38050400 | 2.31707900  |
| O  | 0.22795800  | -0.08161400 | 3.43790900  |
| C  | 1.38491400  | -1.95727300 | 0.65758400  |
| C  | -1.13945000 | -2.17633800 | 0.96173900  |
| O  | 2.25547000  | -2.72382200 | 0.70914500  |
| O  | -1.85489500 | -3.05958200 | 1.19946800  |
| Br | -0.37860500 | -1.65154100 | -2.07355900 |
| O  | 0.93647200  | 3.00532100  | -0.66217700 |
| C  | 2.31838500  | 2.61940000  | -0.87130700 |
| C  | 2.47633700  | 1.26906800  | -0.12242500 |

|   |            |             |             |
|---|------------|-------------|-------------|
| H | 2.48129500 | 2.50627000  | -1.94950400 |
| H | 2.95526300 | 3.41644300  | -0.48333900 |
| C | 3.38393300 | 0.31922400  | -0.91242800 |
| H | 4.37200900 | 0.77445700  | -1.04610500 |
| H | 3.52383000 | -0.62720600 | -0.38554400 |
| H | 2.96522600 | 0.10925200  | -1.90062300 |
| C | 3.02635400 | 1.48174200  | 1.30151400  |
| H | 3.02971500 | 0.53868800  | 1.85579300  |
| H | 4.05436300 | 1.85996700  | 1.26240900  |
| H | 2.41373100 | 2.20279400  | 1.85288200  |

**1dimer**

|    |             |             |             |
|----|-------------|-------------|-------------|
| Mn | 1.19855600  | -0.35531700 | 1.07673900  |
| O  | 2.56164300  | -0.32876700 | 3.66817900  |
| O  | -1.25714300 | 0.55018200  | 2.45322000  |
| O  | 0.53911300  | -3.20599800 | 1.52091400  |
| N  | 1.80276500  | 1.57854700  | 0.60502100  |
| N  | 2.85131700  | -0.71412100 | -0.11782900 |
| C  | 2.05653000  | -0.33808100 | 2.61531600  |
| C  | -0.34290600 | 0.17561100  | 1.82609900  |
| C  | 0.76534900  | -2.08480700 | 1.29571100  |
| C  | 1.27304000  | 2.74026600  | 1.04540900  |
| H  | 0.38394500  | 2.66206300  | 1.65861600  |
| C  | 1.82068500  | 3.98391700  | 0.75122700  |
| H  | 1.34444300  | 4.87753100  | 1.13925300  |
| C  | 2.97658700  | 4.05940100  | -0.03869400 |
| C  | 3.54252000  | 2.87546500  | -0.49697500 |
| H  | 4.44042900  | 2.86875400  | -1.10443800 |
| C  | 2.93556800  | 1.66259300  | -0.15382000 |
| C  | 3.45303400  | 0.36309700  | -0.51070300 |
| Mn | -1.19855100 | -0.35530600 | -1.07673900 |
| O  | -2.56162300 | -0.32887500 | -3.66818600 |
| O  | 1.25714500  | 0.55017900  | -2.45323200 |
| O  | -0.53907400 | -3.20598500 | -1.52088800 |
| N  | -1.80278800 | 1.57854700  | -0.60502400 |
| N  | -2.85130800 | -0.71413500 | 0.11782800  |
| C  | -2.05652900 | -0.33807600 | -2.61531300 |
| C  | 0.34289800  | 0.17566000  | -1.82609700 |
| C  | -0.76530600 | -2.08478800 | -1.29571300 |
| C  | -1.27308100 | 2.74027400  | -1.04541400 |
| H  | -0.38398700 | 2.66208300  | -1.65862300 |
| C  | -1.82074300 | 3.98391700  | -0.75123100 |
| H  | -1.34451400 | 4.87753800  | -1.13925800 |
| C  | -2.97664300 | 4.05938500  | 0.03869400  |

|   |             |             |             |
|---|-------------|-------------|-------------|
| C | -3.54255700 | 2.87544100  | 0.49697800  |
| H | -4.44046600 | 2.86871700  | 1.10444300  |
| C | -2.93559100 | 1.66257700  | 0.15382000  |
| C | -3.45303800 | 0.36307500  | 0.51070300  |
| H | -3.42205200 | 5.01784500  | 0.28335700  |
| H | 3.42198300  | 5.01786700  | -0.28335600 |
| O | 4.60316700  | 0.23778900  | -1.20286300 |
| C | 3.70829600  | -1.87526900 | -0.51371300 |
| C | 4.76892100  | -1.19242600 | -1.42835000 |
| H | 4.58914100  | -1.38096100 | -2.49051100 |
| H | 5.79743100  | -1.45275100 | -1.17411300 |
| C | 4.35619600  | -2.48324300 | 0.74158000  |
| H | 3.59707700  | -2.89152400 | 1.41343400  |
| H | 5.03134700  | -3.29570700 | 0.45222700  |
| H | 4.93488000  | -1.73124600 | 1.28734800  |
| C | 2.91865600  | -2.93079000 | -1.29352800 |
| H | 3.60491100  | -3.70071700 | -1.66319500 |
| H | 2.17299600  | -3.41682700 | -0.66257400 |
| H | 2.41034300  | -2.48365700 | -2.15201300 |
| O | -4.60317000 | 0.23775200  | 1.20286400  |
| C | -4.76890600 | -1.19246600 | 1.42834900  |
| C | -3.70827300 | -1.87529500 | 0.51371100  |
| H | -4.58912100 | -1.38100000 | 2.49050900  |
| H | -5.79741300 | -1.45280300 | 1.17411300  |
| C | -2.91862300 | -2.93080800 | 1.29352700  |
| H | -3.60487200 | -3.70074000 | 1.66319500  |
| H | -2.17295900 | -3.41684000 | 0.66257700  |
| H | -2.41031500 | -2.48366900 | 2.15201200  |
| C | -4.35616700 | -2.48327700 | -0.74158200 |
| H | -3.59704400 | -2.89155000 | -1.41343600 |
| H | -5.03131000 | -3.29574700 | -0.45222900 |
| H | -4.93485900 | -1.73128600 | -1.28735100 |

#### TS2\_4

|    |             |             |             |
|----|-------------|-------------|-------------|
| Mn | -0.16842900 | -0.98548700 | -0.46025000 |
| N  | -0.78624800 | 0.91669400  | -0.20933800 |
| N  | 1.60947900  | -0.01871900 | -0.26607500 |
| C  | 2.86724400  | -0.53757700 | -0.34221900 |
| C  | 4.01912800  | 0.21527200  | -0.23004700 |
| C  | 3.92207600  | 1.61861000  | -0.03460800 |
| C  | 2.66495100  | 2.18261300  | 0.03062100  |
| C  | 0.18271600  | 1.79103200  | -0.06111800 |
| C  | 1.52543700  | 1.35362800  | -0.08496200 |
| H  | 2.92578300  | -1.60917900 | -0.49858100 |

|   |             |             |             |
|---|-------------|-------------|-------------|
| H | 4.98416200  | -0.27664300 | -0.29377400 |
| H | 4.81435200  | 2.23035200  | 0.05314000  |
| H | 2.52519900  | 3.25028200  | 0.16665300  |
| C | -0.22609700 | -1.27210900 | -2.19022800 |
| O | -0.28221800 | -1.55598300 | -3.33303300 |
| C | -1.76859600 | -1.67784800 | -0.10559500 |
| C | 0.55877600  | -2.53918700 | 0.00201700  |
| O | -2.81166200 | -2.17073500 | 0.12233100  |
| O | 1.02578500  | -3.57962400 | 0.29470700  |
| O | -0.18346000 | 3.10170300  | 0.09059100  |
| C | -1.58820200 | 3.13753300  | -0.26941400 |
| C | -2.07507600 | 1.66609400  | -0.14892000 |
| H | -2.09562000 | 3.82469900  | 0.40984700  |
| H | -1.66619200 | 3.50949500  | -1.29782900 |
| C | -2.76587400 | 1.42420100  | 1.20587400  |
| H | -3.69388600 | 2.00457600  | 1.26122900  |
| H | -3.01084400 | 0.36750600  | 1.33307700  |
| H | -2.11640000 | 1.72999700  | 2.03192700  |
| C | -3.00133300 | 1.29745000  | -1.31248500 |
| H | -3.34781100 | 0.26512400  | -1.22677000 |
| H | -3.87981700 | 1.95284900  | -1.31320900 |
| H | -2.48407100 | 1.41114700  | -2.26994200 |
| C | -0.11486200 | -0.86209500 | 2.57070900  |
| O | 0.46005900  | 0.17017300  | 2.68680600  |
| O | -0.67206400 | -1.85235600 | 2.92617600  |
| C | -3.00133300 | 1.29745000  | -1.31248500 |
| H | -3.34781100 | 0.26512400  | -1.22677000 |
| H | -3.87981700 | 1.95284900  | -1.31320900 |
| H | -2.48407100 | 1.41114700  | -2.26994200 |
| C | -0.11486200 | -0.86209500 | 2.57070900  |
| O | 0.46005900  | 0.17017300  | 2.68680600  |
| O | -0.67206400 | -1.85235600 | 2.92617600  |

#### 4

|    |             |             |             |
|----|-------------|-------------|-------------|
| Mn | -0.13257700 | -1.03278300 | -0.27408300 |
| N  | -0.85608200 | 0.90688900  | -0.17113500 |
| N  | 1.64330500  | 0.06319000  | -0.23465700 |
| C  | 2.90586200  | -0.39162500 | -0.33266100 |
| C  | 4.02018100  | 0.43693800  | -0.22621600 |
| C  | 3.83483400  | 1.80845200  | -0.01566800 |
| C  | 2.53534800  | 2.29808500  | 0.07208200  |
| C  | 0.07381500  | 1.78139900  | -0.00621600 |
| C  | 1.47211300  | 1.39652400  | -0.03723800 |
| H  | 3.02354400  | -1.45632900 | -0.49786100 |

|   |             |             |             |
|---|-------------|-------------|-------------|
| H | 5.01285500  | 0.00803600  | -0.30813600 |
| H | 4.68482800  | 2.47746000  | 0.07004000  |
| H | 2.33116900  | 3.35209300  | 0.22185200  |
| C | -0.19130400 | -1.15227500 | -2.06601700 |
| O | -0.24464100 | -1.31398600 | -3.22174500 |
| C | -1.71772500 | -1.81871000 | -0.04382600 |
| C | 0.69535900  | -2.59328500 | -0.04343200 |
| O | -2.74208900 | -2.35581900 | 0.10998200  |
| O | 1.23016000  | -3.61776100 | 0.12455400  |
| O | -0.28401500 | 3.07358600  | 0.14969800  |
| C | -1.72845300 | 3.10598200  | -0.05369200 |
| C | -2.16827800 | 1.60929600  | -0.11093800 |
| H | -2.16930700 | 3.65620700  | 0.77910200  |
| H | -1.91537000 | 3.63838900  | -0.99047800 |
| C | -2.92989700 | 1.20925100  | 1.16346900  |
| H | -3.85156800 | 1.79670600  | 1.23743700  |
| H | -3.19793500 | 0.15109200  | 1.14510100  |
| H | -2.32058800 | 1.39500900  | 2.05209500  |
| C | -2.99689300 | 1.31400600  | -1.36734900 |
| H | -3.26348800 | 0.25513100  | -1.41717300 |
| H | -3.92297900 | 1.89885400  | -1.34999300 |
| H | -2.44001200 | 1.57580900  | -2.27227000 |
| C | -0.04992600 | -0.93955000 | 1.95246900  |
| O | 0.39844800  | 0.13696800  | 2.42401700  |
| O | -0.44505200 | -1.93628400 | 2.62778200  |

## 5

|    |             |             |             |
|----|-------------|-------------|-------------|
| Mn | -1.45738300 | 0.07275400  | -1.09637400 |
| N  | -1.34702500 | -1.21787300 | 0.53077500  |
| N  | -1.97413600 | 1.35121500  | 0.48234700  |
| C  | -2.34179200 | 2.64229600  | 0.41892100  |
| C  | -2.60024200 | 3.41171000  | 1.55221300  |
| C  | -2.48305500 | 2.82583200  | 2.81603800  |
| C  | -2.11445500 | 1.48533000  | 2.89775300  |
| C  | -1.51082000 | -0.62006400 | 1.65716900  |
| C  | -1.86453400 | 0.78974000  | 1.71262600  |
| H  | -2.42860800 | 3.07266700  | -0.57193100 |
| H  | -2.88902400 | 4.45054900  | 1.43664800  |
| H  | -2.68056600 | 3.40001800  | 3.71528000  |
| H  | -2.01803500 | 0.97664900  | 3.85001300  |
| C  | -3.17173200 | -0.33422200 | -1.49230100 |
| O  | -4.26146000 | -0.58466800 | -1.82227400 |
| C  | -0.78603400 | -1.07982700 | -2.28362300 |
| C  | -1.34978800 | 1.39302700  | -2.29064400 |

|   |             |             |             |
|---|-------------|-------------|-------------|
| O | -0.34183700 | -1.81278800 | -3.07298800 |
| O | -1.25887600 | 2.25425200  | -3.07154900 |
| O | -1.39224300 | -1.34267200 | 2.78852900  |
| C | -1.21924900 | -2.72539800 | 2.35247800  |
| C | -1.01328600 | -2.64366000 | 0.80737300  |
| H | -0.35980300 | -3.13620600 | 2.88424900  |
| H | -2.12494600 | -3.27080300 | 2.63120100  |
| C | 0.44903900  | -2.92891800 | 0.42836200  |
| H | 0.70510900  | -3.95668900 | 0.70763500  |
| H | 0.60541700  | -2.81681100 | -0.64640400 |
| H | 1.12432700  | -2.24430300 | 0.94863300  |
| C | -1.97268400 | -3.57895800 | 0.06126900  |
| H | -1.84073500 | -3.49079700 | -1.02017100 |
| H | -1.77428800 | -4.61831800 | 0.34452500  |
| H | -3.01378700 | -3.34671900 | 0.30552100  |
| C | 0.60099400  | 0.58590300  | -0.63466900 |
| O | 0.90453600  | 0.76626800  | 0.57045200  |
| O | 1.45157200  | 0.69485800  | -1.59832700 |
| H | 2.87693600  | 1.18472400  | -1.24196000 |
| C | 5.11126400  | 0.10453000  | 0.38437000  |
| C | 4.17846500  | 1.30069200  | 0.25461100  |
| F | 6.27526500  | 0.26250500  | -0.30303800 |
| F | 5.45620800  | -0.10875200 | 1.68659900  |
| F | 4.55539400  | -1.05136300 | -0.06622500 |
| O | 3.82740500  | 1.53751000  | -1.07913600 |
| H | 3.29549400  | 1.09298500  | 0.87408000  |
| H | 4.71807100  | 2.15912100  | 0.67485200  |

#### TS5\_6

|    |            |             |             |
|----|------------|-------------|-------------|
| Mn | 1.73432800 | -0.94569700 | -0.92209000 |
| N  | 2.92937100 | 0.59096600  | -0.17574200 |
| N  | 2.07726600 | -1.60055100 | 1.04488500  |
| C  | 1.67508100 | -2.74608800 | 1.61897700  |
| C  | 1.90406700 | -3.03808800 | 2.96348500  |
| C  | 2.58424300 | -2.11081600 | 3.75618800  |
| C  | 3.01798000 | -0.92291600 | 3.17078700  |
| C  | 3.17182500 | 0.47127900  | 1.08031500  |
| C  | 2.74058500 | -0.70762500 | 1.82009300  |
| H  | 1.15153800 | -3.44981900 | 0.98254400  |
| H  | 1.55162200 | -3.97879800 | 3.37182400  |
| H  | 2.77697200 | -2.31157400 | 4.80488100  |
| H  | 3.55916200 | -0.17236700 | 3.73511800  |
| C  | 3.14050900 | -1.87313300 | -1.59335300 |
| O  | 4.00412300 | -2.48835900 | -2.07192600 |



|          |             |             |             |
|----------|-------------|-------------|-------------|
| C        | 1.37014300  | -0.15315400 | -2.48344800 |
| C        | 0.55409300  | -2.23776800 | -1.28134200 |
| O        | 1.11324100  | 0.34989600  | -3.50090100 |
| O        | -0.22799600 | -3.06835900 | -1.51384200 |
| O        | 3.87494800  | 1.44155900  | 1.69213400  |
| C        | 4.28379900  | 2.35773500  | 0.62988700  |
| C        | 3.50493400  | 1.88605700  | -0.63800100 |
| H        | 4.02686700  | 3.36908000  | 0.94788900  |
| H        | 5.36754900  | 2.26531100  | 0.52051400  |
| C        | 2.37804600  | 2.86875100  | -0.99510900 |
| H        | 2.81073100  | 3.83967600  | -1.25926700 |
| H        | 1.79853500  | 2.50940800  | -1.84813600 |
| H        | 1.69925100  | 3.00511000  | -0.14890200 |
| C        | 4.44714100  | 1.66526000  | -1.82745400 |
| H        | 3.89616700  | 1.30695700  | -2.70089700 |
| H        | 4.93309300  | 2.60932100  | -2.09601500 |
| H        | 5.22335600  | 0.93462900  | -1.58072400 |
| C        | 0.09037900  | 0.13407900  | -0.10373000 |
| O        | 0.17425800  | 0.66618400  | 1.02249500  |
| O        | -1.01334200 | 0.22069800  | -0.81494100 |
| H        | -1.96883900 | 0.80756900  | -0.28923000 |
| C        | -2.83470200 | 3.70859600  | 0.45668000  |
| C        | -2.69702900 | 2.31449100  | 1.05421800  |
| F        | -4.08021500 | 3.95778100  | -0.03232500 |
| F        | -2.58594000 | 4.67307400  | 1.39004400  |
| F        | -1.97056600 | 3.93108500  | -0.56997300 |
| O        | -2.96052400 | 1.32343000  | 0.11128500  |
| H        | -1.67352000 | 2.23591900  | 1.44926200  |
| H        | -3.39950500 | 2.27508800  | 1.89984200  |
| C        | -4.94130700 | -2.29137600 | -0.17889100 |
| C        | -4.90126500 | -1.26028000 | 0.94400400  |
| F        | -4.02367600 | -2.04559000 | -1.14900400 |
| F        | -4.68907800 | -3.54190600 | 0.29762900  |
| F        | -6.15060300 | -2.34319500 | -0.79576000 |
| O        | -5.17801500 | 0.02719300  | 0.47054300  |
| H        | -4.31217100 | 0.51788700  | 0.30480100  |
| H        | -5.65694600 | -1.56567200 | 1.67672600  |
| H        | -3.91246800 | -1.33739200 | 1.41388800  |
| <b>6</b> |             |             |             |
| Mn       | 0.16605600  | -1.02086300 | 0.26406400  |
| N        | 0.82159700  | 0.96235500  | 0.12178900  |
| N        | -1.66424200 | 0.03307400  | 0.19320200  |
| C        | -2.90667900 | -0.46839100 | 0.26450700  |

|   |             |             |             |
|---|-------------|-------------|-------------|
| C | -4.04799900 | 0.32820000  | 0.15489400  |
| C | -3.90391000 | 1.70257000  | -0.03451100 |
| C | -2.61720600 | 2.23707600  | -0.10402700 |
| C | -0.13832100 | 1.80414200  | -0.01858900 |
| C | -1.53262900 | 1.36962900  | 0.01200000  |
| H | -2.99300500 | -1.53829400 | 0.41170500  |
| H | -5.02697000 | -0.13342100 | 0.21843100  |
| H | -4.77311400 | 2.34558700  | -0.12291100 |
| H | -2.44607600 | 3.29793200  | -0.24405700 |
| C | 0.19114600  | -0.96614600 | 2.09003200  |
| O | 0.21381100  | -0.96824300 | 3.24760800  |
| C | 1.79619100  | -1.77307700 | 0.17654400  |
| C | -0.60109000 | -2.64362700 | 0.22945700  |
| O | 2.83915800  | -2.27763700 | 0.11542100  |
| O | -1.09069400 | -3.69548000 | 0.19375500  |
| O | 0.16336100  | 3.10175900  | -0.16686500 |
| C | 1.61941100  | 3.18842800  | -0.05287900 |
| C | 2.11113500  | 1.70946000  | 0.05953600  |
| H | 1.98783600  | 3.69988800  | -0.94334000 |
| H | 1.83970000  | 3.78192800  | 0.83715100  |
| C | 2.90616900  | 1.29253400  | -1.18715100 |
| H | 3.80882000  | 1.90744100  | -1.26622900 |
| H | 3.21221600  | 0.24570200  | -1.12842000 |
| H | 2.30975400  | 1.43008100  | -2.09335200 |
| C | 2.92238700  | 1.48021500  | 1.34124600  |
| H | 3.21895400  | 0.43231000  | 1.43387400  |
| H | 3.83189300  | 2.08969200  | 1.31821500  |
| H | 2.34292600  | 1.75886100  | 2.22651100  |
| C | 0.08259800  | -0.99429300 | -1.81088400 |
| O | -0.34386100 | -0.08806700 | -2.52270600 |
| O | 0.55512100  | -2.12202200 | -2.46145400 |
| H | 0.45177700  | -1.96690800 | -3.42121000 |

7

|    |             |             |             |
|----|-------------|-------------|-------------|
| Mn | 0.19625700  | -1.01744600 | 0.28360600  |
| N  | 0.78988600  | 0.99444900  | 0.14146600  |
| N  | -1.67771400 | -0.05649900 | 0.11363300  |
| C  | -2.91002900 | -0.58757000 | 0.13470200  |
| C  | -4.08439100 | 0.15029400  | 0.02269000  |
| C  | -3.98352400 | 1.56973500  | -0.11758200 |
| C  | -2.73631700 | 2.15079300  | -0.13520000 |
| C  | -0.24578300 | 1.79842000  | -0.01808000 |
| C  | -1.57303600 | 1.33599000  | -0.01755800 |
| H  | -2.96066700 | -1.66779500 | 0.24350900  |

|   |             |             |             |
|---|-------------|-------------|-------------|
| H | -5.04419300 | -0.35407800 | 0.04220500  |
| H | -4.87782700 | 2.18026300  | -0.20546000 |
| H | -2.61500800 | 3.22520000  | -0.23508600 |
| C | 0.09596600  | -0.85331700 | 2.09253100  |
| O | 0.03006900  | -0.76530100 | 3.24850200  |
| C | 1.85629300  | -1.68299400 | 0.33762300  |
| C | -0.50655400 | -2.65779400 | 0.27336600  |
| O | 2.92862500  | -2.13571000 | 0.38079600  |
| O | -0.95938900 | -3.73198500 | 0.25000800  |
| O | 0.06105300  | 3.12823100  | -0.18694200 |
| C | 1.47022100  | 3.24003300  | 0.12915400  |
| C | 2.02822100  | 1.79147000  | 0.03130100  |
| H | 1.92359300  | 3.93483500  | -0.58097000 |
| H | 1.56220100  | 3.64136200  | 1.14565800  |
| C | 2.71654500  | 1.54724000  | -1.32638000 |
| H | 3.62590400  | 2.15406200  | -1.40992900 |
| H | 2.99421100  | 0.49460300  | -1.43168100 |
| H | 2.04811700  | 1.80810400  | -2.15279900 |
| C | 3.00256600  | 1.50775800  | 1.18374400  |
| H | 3.39830500  | 0.49079200  | 1.12301000  |
| H | 3.85115400  | 2.20065800  | 1.14265000  |
| H | 2.50529200  | 1.62957100  | 2.15123000  |
| C | 0.23284700  | -1.09846600 | -1.79590100 |
| O | -0.31822400 | -0.36332500 | -2.61335500 |
| O | 0.98430500  | -2.14174300 | -2.34840800 |
| H | 0.90763700  | -2.05795100 | -3.31945000 |

## 8

|    |             |             |             |
|----|-------------|-------------|-------------|
| Mn | 0.62048400  | -0.08764700 | 0.79928100  |
| N  | 2.28483900  | -0.90085500 | -0.19420400 |
| N  | 1.62442300  | 1.66983900  | 0.19251500  |
| C  | 1.30582500  | 2.95361900  | 0.42288500  |
| C  | 2.05109500  | 4.03873900  | -0.02631000 |
| C  | 3.23983900  | 3.78169700  | -0.77821600 |
| C  | 3.60299700  | 2.47790100  | -1.02599200 |
| C  | 3.05143100  | 0.04134100  | -0.71328800 |
| C  | 2.79390200  | 1.41168500  | -0.53724700 |
| H  | 0.39932400  | 3.12348300  | 0.99769200  |
| H  | 1.72374000  | 5.04847000  | 0.19550400  |
| H  | 3.84859200  | 4.60313400  | -1.14535300 |
| H  | 4.50007300  | 2.23864400  | -1.58897200 |
| C  | 1.57883400  | -0.07727800 | 2.34783900  |
| O  | 2.18120200  | -0.06615800 | 3.33906800  |
| C  | -0.14140700 | -1.66549900 | 1.16924100  |

|   |             |             |             |
|---|-------------|-------------|-------------|
| C | -0.74891000 | 0.80831600  | 1.51199800  |
| O | -0.64462800 | -2.68449000 | 1.42122600  |
| O | -1.64658200 | 1.39698600  | 1.96630800  |
| O | 4.12547800  | -0.40888000 | -1.44307800 |
| C | 4.20035200  | -1.83132400 | -1.17967300 |
| C | 2.80307100  | -2.21797900 | -0.61625600 |
| H | 4.45258100  | -2.33676500 | -2.11432500 |
| H | 4.99548200  | -2.00185700 | -0.44384300 |
| C | 1.90955500  | -2.83248200 | -1.71207600 |
| H | 2.30228400  | -3.80713700 | -2.02491200 |
| H | 0.89044400  | -2.97547100 | -1.34180900 |
| H | 1.86461500  | -2.17896700 | -2.58887500 |
| C | 2.94491900  | -3.18730000 | 0.56608100  |
| H | 1.96682900  | -3.46526900 | 0.96687900  |
| H | 3.44877600  | -4.10647100 | 0.24500600  |
| H | 3.53372200  | -2.73434500 | 1.37000300  |
| C | -0.34526200 | -0.03191700 | -1.03646800 |
| O | 0.03931800  | 0.41970900  | -2.10705800 |
| O | -1.64984800 | -0.60048300 | -1.08880200 |
| H | -1.96032100 | -0.50209700 | -2.01029200 |
| C | -5.57923200 | 0.19581600  | -0.53200500 |
| C | -4.63118000 | 0.05082400  | 0.65323700  |
| F | -6.43737600 | -0.84927400 | -0.64545800 |
| F | -6.33517000 | 1.31943500  | -0.41255400 |
| F | -4.91870900 | 0.28502600  | -1.71615700 |
| O | -3.84392300 | -1.10920800 | 0.55180700  |
| H | -3.04267100 | -0.91804000 | 0.01794800  |
| H | -4.03227100 | 0.96657900  | 0.711179300 |
| H | -5.24995700 | -0.01904700 | 1.55260900  |

#### TS8\_9

|    |            |             |             |
|----|------------|-------------|-------------|
| Mn | 0.56079400 | 0.08544200  | 0.45667500  |
| N  | 2.23402100 | -1.04393000 | -0.09865000 |
| N  | 1.95422100 | 1.61290900  | 0.04739400  |
| C  | 1.79059800 | 2.94836500  | 0.10296000  |
| C  | 2.79580800 | 3.86480700  | -0.17119500 |
| C  | 4.08836100 | 3.37469100  | -0.53385100 |
| C  | 4.29209300 | 2.01616600  | -0.60025900 |
| C  | 3.28711000 | -0.27847900 | -0.34188400 |
| C  | 3.22002700 | 1.12550900  | -0.30845500 |
| H  | 0.80074600 | 3.29732300  | 0.38137800  |
| H  | 2.58797100 | 4.92692200  | -0.10692200 |
| H  | 4.89687200 | 4.06515400  | -0.75480900 |
| H  | 5.25716300 | 1.60084900  | -0.87294400 |

|   |             |             |             |
|---|-------------|-------------|-------------|
| C | 1.15188500  | 0.09415500  | 2.18578900  |
| O | 1.54966700  | 0.11974300  | 3.26877500  |
| C | -0.52887300 | -1.32873200 | 0.74170900  |
| C | -0.78026700 | 1.23906400  | 0.83027400  |
| O | -1.23344400 | -2.22305700 | 0.95295100  |
| O | -1.62643600 | 1.98398900  | 1.09323400  |
| O | 4.44866300  | -0.94756300 | -0.61724800 |
| C | 4.06714500  | -2.33789600 | -0.77572700 |
| C | 2.67136900  | -2.45826400 | -0.10211400 |
| H | 4.01993500  | -2.55775100 | -1.84843500 |
| H | 4.83594100  | -2.95493500 | -0.30688300 |
| C | 1.74302400  | -3.35153500 | -0.93562900 |
| H | 2.17422800  | -4.35419400 | -1.03519000 |
| H | 0.76391700  | -3.45699400 | -0.46198900 |
| H | 1.60163600  | -2.93603300 | -1.93794900 |
| C | 2.79082300  | -2.99286500 | 1.33849400  |
| H | 1.81882300  | -2.97327900 | 1.84024500  |
| H | 3.15066100  | -4.02810600 | 1.33420000  |
| H | 3.49158400  | -2.38646300 | 1.92196700  |
| C | 0.18782200  | 0.14254800  | -1.50465500 |
| O | 0.53126500  | 0.22791100  | -2.60411100 |
| O | -2.00510000 | 0.06494100  | -1.78052000 |
| H | -2.00287800 | 0.15567700  | -2.74421500 |
| C | -5.78291600 | 0.18138500  | 0.04725100  |
| C | -5.19451900 | -0.20142200 | -1.30658800 |
| F | -4.89363100 | 0.82118200  | 0.85079900  |
| F | -6.85125400 | 1.01839100  | -0.09710200 |
| F | -6.22858000 | -0.89527500 | 0.74993700  |
| O | -4.11832000 | -1.07104400 | -1.17469200 |
| H | -3.19737000 | -0.56935700 | -1.42586500 |
| H | -6.02058700 | -0.65352500 | -1.87547200 |
| H | -4.92229300 | 0.74279700  | -1.80175600 |

**9**

|    |             |             |             |
|----|-------------|-------------|-------------|
| Mn | 0.05655500  | 1.12841800  | -0.00930400 |
| C  | 0.03025400  | 0.97329500  | 1.85981500  |
| O  | -0.01300200 | 0.84026200  | 2.99753800  |
| N  | 0.94746200  | -0.76116700 | -0.08911300 |
| N  | -1.64667100 | -0.10692800 | -0.00634100 |
| C  | -2.94855000 | 0.24320900  | 0.00582800  |
| C  | -3.99157000 | -0.66951600 | 0.01231000  |
| C  | -3.68272000 | -2.06469300 | 0.00338300  |
| C  | -2.36526400 | -2.45698700 | -0.01064000 |
| C  | 0.04541100  | -1.73299100 | -0.03730400 |

|   |             |             |             |
|---|-------------|-------------|-------------|
| C | -1.33517400 | -1.47416600 | -0.01441800 |
| H | -3.15979000 | 1.30794700  | 0.01102900  |
| H | -5.01565200 | -0.31435300 | 0.02367500  |
| H | -4.47796900 | -2.80384000 | 0.00588900  |
| H | -2.08562400 | -3.50556100 | -0.02032000 |
| C | 0.00788700  | 1.04432900  | -1.88532400 |
| O | -0.03582700 | 0.93967900  | -3.02567300 |
| C | 1.61534200  | 2.06410100  | 0.00391800  |
| C | -0.90637200 | 2.66797600  | 0.03227800  |
| O | 2.58944100  | 2.68379900  | 0.02008700  |
| O | -1.51134200 | 3.65136500  | 0.05899400  |
| O | 0.55397500  | -2.99894700 | -0.00391200 |
| C | 1.97267000  | -2.85818700 | -0.27754400 |
| C | 2.29837800  | -1.36323300 | -0.00097500 |
| H | 2.14313900  | -3.12384700 | -1.32684100 |
| H | 2.51108500  | -3.55133200 | 0.37103000  |
| C | 3.25106600  | -0.81144700 | -1.06946500 |
| H | 3.50145700  | 0.23492300  | -0.87760900 |
| H | 4.18740300  | -1.38058000 | -1.06856700 |
| H | 2.80348200  | -0.88647500 | -2.06518700 |
| C | 2.88926200  | -1.17235000 | 1.40911300  |
| H | 3.86967800  | -1.65654700 | 1.48039700  |
| H | 3.02030200  | -0.11003800 | 1.63593000  |
| H | 2.23338300  | -1.60936000 | 2.16924300  |

## 10

|    |             |             |             |
|----|-------------|-------------|-------------|
| Mn | 0.64967100  | -0.08538600 | 0.80599800  |
| N  | 2.28126300  | -0.89565200 | -0.22936300 |
| N  | 1.69965100  | 1.65671200  | 0.22544500  |
| C  | 1.39275100  | 2.93329000  | 0.50127200  |
| C  | 2.14452200  | 4.00841700  | 0.02346800  |
| C  | 3.26316900  | 3.75782900  | -0.77067800 |
| C  | 3.59679200  | 2.43402000  | -1.05857600 |
| C  | 3.04325000  | -0.00290600 | -0.75165600 |
| C  | 2.79006500  | 1.42112900  | -0.54411700 |
| H  | 0.52083600  | 3.10283400  | 1.12159000  |
| H  | 1.84727800  | 5.01968800  | 0.27746800  |
| H  | 3.86581500  | 4.57366600  | -1.15541000 |
| H  | 4.45833800  | 2.18093300  | -1.66515900 |
| C  | 1.55836200  | -0.15945900 | 2.39198300  |
| O  | 2.10414800  | -0.20926000 | 3.41056400  |
| C  | -0.17078700 | -1.65623300 | 1.11378200  |
| C  | -0.72088600 | 0.81507700  | 1.53751900  |
| O  | -0.70596500 | -2.66474500 | 1.31600600  |

|   |             |             |             |
|---|-------------|-------------|-------------|
| O | -1.61115800 | 1.39719900  | 2.00151900  |
| O | 4.09761700  | -0.40382000 | -1.47479500 |
| C | 4.11625600  | -1.86335700 | -1.37527200 |
| C | 2.80125000  | -2.23881400 | -0.62052600 |
| H | 4.16286800  | -2.26112700 | -2.38973900 |
| H | 5.01822800  | -2.13817400 | -0.82365400 |
| C | 1.80256300  | -2.93937400 | -1.55489400 |
| H | 2.22381300  | -3.89302000 | -1.89003200 |
| H | 0.86070700  | -3.14616800 | -1.04159100 |
| H | 1.59163200  | -2.32338300 | -2.43352800 |
| C | 3.09240000  | -3.08735800 | 0.62351900  |
| H | 2.17198800  | -3.32515900 | 1.16254400  |
| H | 3.56199900  | -4.03033100 | 0.32451700  |
| H | 3.77126200  | -2.56415800 | 1.30350000  |
| C | -0.27927700 | 0.05426800  | -1.04029800 |
| O | 0.22460200  | 0.39982200  | -2.10112100 |
| O | -1.64392500 | -0.27183600 | -1.10460500 |
| H | -1.92682400 | -0.15217600 | -2.03260100 |
| C | -5.65274800 | 0.17388200  | -0.53323400 |
| C | -4.71709500 | 0.01113300  | 0.65958300  |
| F | -6.39594900 | -0.93599300 | -0.76756900 |
| F | -6.52079900 | 1.19985400  | -0.33151100 |
| F | -4.98057900 | 0.44132500  | -1.68397200 |
| O | -3.83145800 | -1.06678300 | 0.48306700  |
| H | -3.05196900 | -0.77490400 | -0.03170200 |
| H | -4.20094200 | 0.96647100  | 0.80759500  |
| H | -5.34166400 | -0.18830800 | 1.53481600  |

#### TS10\_11

|    |             |             |             |
|----|-------------|-------------|-------------|
| Mn | 0.77568700  | -0.47499700 | 0.67486000  |
| N  | 2.61765900  | -0.49831800 | -0.34945300 |
| N  | 1.14407900  | 1.59065300  | 0.36965100  |
| C  | 0.35783500  | 2.61328200  | 0.73306300  |
| C  | 0.70633800  | 3.94498700  | 0.49058700  |
| C  | 1.90452300  | 4.23087400  | -0.15997900 |
| C  | 2.72538400  | 3.17117900  | -0.55246900 |
| C  | 3.06716000  | 0.67650100  | -0.62337800 |
| C  | 2.30788900  | 1.87501400  | -0.26602400 |
| H  | -0.57697600 | 2.36093700  | 1.21449600  |
| H  | 0.03599500  | 4.73473500  | 0.81030200  |
| H  | 2.19664900  | 5.25584500  | -0.36187500 |
| H  | 3.66465900  | 3.33505600  | -1.06721500 |
| C  | 1.68568100  | -0.39092200 | 2.28290400  |
| O  | 2.24837400  | -0.33620800 | 3.28352400  |

|   |             |             |             |
|---|-------------|-------------|-------------|
| C | 0.59876300  | -2.27561300 | 0.82066000  |
| C | -0.82384100 | -0.24038600 | 1.53386800  |
| O | 0.46693300  | -3.41784500 | 0.92321000  |
| O | -1.80141400 | -0.13768500 | 2.13201500  |
| O | 4.24582900  | 0.78161700  | -1.23829300 |
| C | 4.69737600  | -0.59026100 | -1.48515100 |
| C | 3.62864000  | -1.50334100 | -0.80253100 |
| H | 4.74540000  | -0.72273200 | -2.56767600 |
| H | 5.69305100  | -0.68763700 | -1.05070900 |
| C | 3.01099900  | -2.48233400 | -1.80887300 |
| H | 3.79212100  | -3.14118300 | -2.20178400 |
| H | 2.25041100  | -3.10920800 | -1.33759400 |
| H | 2.55589300  | -1.94835100 | -2.64762100 |
| C | 4.21121500  | -2.24204500 | 0.41113700  |
| H | 3.44518700  | -2.83440500 | 0.91799300  |
| H | 4.99987500  | -2.92527600 | 0.07976700  |
| H | 4.64399500  | -1.53967200 | 1.12976400  |
| C | -0.08388500 | -0.53348500 | -1.09792100 |
| O | -0.24456000 | -0.82726400 | -2.19726900 |
| O | -1.88966300 | 0.91578200  | -0.79568400 |
| H | -1.66140400 | 1.58336700  | -1.45761800 |
| C | -5.81690800 | -0.17535600 | -0.21985000 |
| C | -5.00213400 | 0.32962200  | -1.40719800 |
| F | -5.16142300 | -0.05181500 | 0.96490500  |
| F | -6.98764100 | 0.51503900  | -0.08989800 |
| F | -6.15515800 | -1.48830200 | -0.33434700 |
| O | -3.82103900 | -0.37974700 | -1.56921200 |
| H | -2.95666300 | 0.21781400  | -1.22858500 |
| H | -5.66270000 | 0.23560800  | -2.28257900 |
| H | -4.83773000 | 1.40389300  | -1.22729300 |

## 11

|    |             |             |             |
|----|-------------|-------------|-------------|
| Mn | 0.07935900  | 1.10750800  | 0.00000500  |
| C  | 0.05922600  | 1.05931600  | 1.88805200  |
| O  | 0.03947100  | 1.02665000  | 3.03034400  |
| N  | 0.90347000  | -0.82055600 | -0.00005300 |
| N  | -1.66103400 | -0.10736900 | 0.00000300  |
| C  | -2.94129500 | 0.29347000  | 0.00003200  |
| C  | -4.00737000 | -0.60934100 | 0.00004800  |
| C  | -3.74373100 | -1.97702100 | 0.00003200  |
| C  | -2.41432300 | -2.40487800 | -0.00000400 |
| C  | 0.01792200  | -1.75650700 | -0.00005400 |
| C  | -1.41098000 | -1.44176100 | -0.00001700 |
| H  | -3.12460800 | 1.36066400  | 0.00004400  |



|   |             |             |             |
|---|-------------|-------------|-------------|
| H | -5.02236900 | -0.22911800 | 0.00007400  |
| H | -4.55296000 | -2.69909900 | 0.00004600  |
| H | -2.15208800 | -3.45617700 | -0.00002200 |
| C | 0.05924200  | 1.05934600  | -1.88804700 |
| O | 0.03950000  | 1.02668400  | -3.03033900 |
| C | 1.67507900  | 2.00471100  | 0.00003400  |
| C | -0.83207800 | 2.69545800  | 0.00000700  |
| O | 2.66613400  | 2.58728500  | 0.00006300  |
| O | -1.39305500 | 3.69908000  | -0.00000200 |
| O | 0.42876100  | -3.02120700 | -0.00008300 |
| C | 1.89414900  | -2.97544000 | -0.00028800 |
| C | 2.25968200  | -1.45489300 | -0.00002000 |
| H | 2.23243300  | -3.49978000 | -0.89512900 |
| H | 2.23271000  | -3.50017700 | 0.89421200  |
| C | 3.03067400  | -1.06710700 | -1.26896500 |
| H | 3.26100100  | 0.00099000  | -1.28605400 |
| H | 3.97896500  | -1.61295900 | -1.29944300 |
| H | 2.46052800  | -1.31927000 | -2.16776500 |
| C | 3.03038300  | -1.06746500 | 1.26921800  |
| H | 3.97874300  | -1.61319700 | 1.29967600  |
| H | 3.26055100  | 0.00066000  | 1.28673300  |
| H | 2.46010300  | -1.32003000 | 2.16782100  |

#### TS6\_12

|    |             |             |             |
|----|-------------|-------------|-------------|
| Mn | 0.56667200  | 0.49669500  | -1.00705400 |
| N  | 0.95702400  | -0.89227600 | 0.51381000  |
| N  | -1.18257100 | -0.69878200 | -1.04562000 |
| C  | -2.24212100 | -0.57443500 | -1.85835900 |
| C  | -3.34722300 | -1.42574200 | -1.78861100 |
| C  | -3.35936400 | -2.45078200 | -0.84416300 |
| C  | -2.26069200 | -2.59193800 | 0.00529800  |
| C  | 0.00592100  | -1.73831800 | 0.69297300  |
| C  | -1.20205200 | -1.69790500 | -0.12946300 |
| H  | -2.20911100 | 0.22743400  | -2.58601400 |
| H  | -4.17661800 | -1.27602900 | -2.47052300 |
| H  | -4.20384100 | -3.12742200 | -0.76870800 |
| H  | -2.21551900 | -3.37151100 | 0.75661200  |
| C  | 1.35887300  | -0.60819200 | -2.25075500 |
| O  | 1.85898300  | -1.28033800 | -3.04319600 |
| C  | 2.08014200  | 1.45782800  | -0.79870500 |
| C  | 0.00145000  | 1.64102100  | -2.28183400 |
| O  | 3.03958900  | 2.09270100  | -0.67628500 |
| O  | -0.35772100 | 2.38944100  | -3.08850100 |
| O  | 0.14627200  | -2.66771000 | 1.64336300  |

|   |             |             |            |
|---|-------------|-------------|------------|
| C | 1.46439300  | -2.43998600 | 2.23871100 |
| C | 2.04677200  | -1.19852900 | 1.48778300 |
| H | 1.31332000  | -2.26695600 | 3.30546800 |
| H | 2.04995200  | -3.34849700 | 2.08657200 |
| C | 2.25602000  | -0.01542100 | 2.44360600 |
| H | 3.00388200  | -0.28302600 | 3.19700500 |
| H | 2.61676700  | 0.86647700  | 1.90892600 |
| H | 1.32593300  | 0.24333200  | 2.95785600 |
| C | 3.34150800  | -1.54996100 | 0.74194300 |
| H | 3.72069700  | -0.69020700 | 0.18392700 |
| H | 4.10965700  | -1.85035600 | 1.46189000 |
| H | 3.18036500  | -2.37729300 | 0.04427800 |
| C | -0.33686500 | 1.68230600  | 0.38200600 |
| O | -1.18876200 | 1.10692300  | 1.26050900 |
| O | -0.17271800 | 2.94681900  | 0.50053700 |
| H | -0.83231900 | 3.25672900  | 1.36665400 |
| C | -1.90334300 | 1.84424800  | 2.30431400 |
| O | -2.62055300 | 1.15312700  | 3.00056800 |
| O | -1.66654700 | 3.09805900  | 2.32633200 |

## 12

|    |             |             |             |
|----|-------------|-------------|-------------|
| Mn | 0.66232300  | 1.01577000  | -0.40644300 |
| N  | 0.89409300  | -1.05799800 | -0.19307300 |
| N  | -1.13983400 | 0.28455600  | -1.24837300 |
| C  | -2.14219000 | 0.99610100  | -1.78466600 |
| C  | -3.28570500 | 0.39935300  | -2.32053400 |
| C  | -3.39951600 | -0.98975100 | -2.30648600 |
| C  | -2.36115300 | -1.74124100 | -1.75384900 |
| C  | -0.10539900 | -1.73341300 | -0.63666600 |
| C  | -1.25778900 | -1.06590800 | -1.23918800 |
| H  | -2.03074900 | 2.07369400  | -1.78672800 |
| H  | -4.06532100 | 1.02569900  | -2.73917300 |
| H  | -4.27592900 | -1.47991000 | -2.71672400 |
| H  | -2.39592200 | -2.82366900 | -1.71725300 |
| C  | 1.45774200  | 0.96607100  | -2.06296500 |
| O  | 1.96399500  | 0.96127000  | -3.10015700 |
| C  | 2.21117100  | 1.47677900  | 0.39511400  |
| C  | 0.22236500  | 2.75354300  | -0.58940800 |
| O  | 3.19500600  | 1.79441500  | 0.91538500  |
| O  | -0.05858700 | 3.87290700  | -0.68526400 |
| O  | -0.06929300 | -3.06707800 | -0.54359300 |
| C  | 1.21938300  | -3.39345000 | 0.06900200  |
| C  | 1.90396300  | -2.01580500 | 0.34695200  |
| H  | 1.01278500  | -3.96325500 | 0.97644800  |

|   |             |             |             |
|---|-------------|-------------|-------------|
| H | 1.76936700  | -4.01140300 | -0.64321600 |
| C | 2.10529800  | -1.78529800 | 1.85146200  |
| H | 2.78749700  | -2.54362400 | 2.24928000  |
| H | 2.54226900  | -0.80307700 | 2.04627700  |
| H | 1.15590100  | -1.85868600 | 2.38959600  |
| C | 3.22644400  | -1.88215500 | -0.42045700 |
| H | 3.68048800  | -0.90162400 | -0.25678900 |
| H | 3.93210200  | -2.64333200 | -0.07186500 |
| H | 3.07208700  | -2.02144900 | -1.49460500 |
| C | -0.23102300 | 1.07104500  | 1.44161200  |
| O | -1.23987200 | 0.05160900  | 1.64456400  |
| O | -0.03511800 | 1.83700100  | 2.38460000  |
| H | -1.03976500 | 1.34381300  | 3.49526800  |
| C | -1.98490700 | -0.12768300 | 2.78523200  |
| O | -2.80294200 | -1.02364200 | 2.82654900  |
| O | -1.76004100 | 0.70570700  | 3.79163700  |

**TS6\_13**

|    |             |             |             |
|----|-------------|-------------|-------------|
| Mn | -0.33235000 | 0.13848500  | 0.66760100  |
| N  | 1.18506400  | -1.11560900 | -0.07374000 |
| N  | 1.15919900  | 1.53950400  | 0.09805100  |
| C  | 1.11414600  | 2.87581000  | 0.20838900  |
| C  | 2.15845900  | 3.70024700  | -0.21674300 |
| C  | 3.29632900  | 3.12430900  | -0.77854100 |
| C  | 3.35544300  | 1.73463000  | -0.89680500 |
| C  | 2.21203800  | -0.47410200 | -0.50672600 |
| C  | 2.27051000  | 0.98629800  | -0.44819600 |
| H  | 0.22056700  | 3.30170200  | 0.64790800  |
| H  | 2.06653700  | 4.77439600  | -0.10303900 |
| H  | 4.12198900  | 3.74076700  | -1.11734800 |
| H  | 4.21600700  | 1.23341700  | -1.32375100 |
| C  | 0.38929800  | 0.03409600  | 2.35224800  |
| O  | 0.83282500  | -0.02674400 | 3.41448800  |
| C  | -1.50325400 | -1.19691900 | 1.03291400  |
| C  | -1.51071300 | 1.40629600  | 1.20824200  |
| O  | -2.21950600 | -2.06719300 | 1.28290600  |
| O  | -2.22465400 | 2.23699200  | 1.57344500  |
| O  | 3.23804000  | -1.16861200 | -1.00584900 |
| C  | 2.86841700  | -2.58015100 | -0.88321200 |
| C  | 1.43500300  | -2.57756500 | -0.25936500 |
| H  | 2.90203300  | -3.01259100 | -1.88435700 |
| H  | 3.61510000  | -3.05520800 | -0.24446700 |
| C  | 0.40545800  | -3.17714500 | -1.22785200 |
| H  | 0.65290100  | -4.22664500 | -1.41761800 |

|   |             |             |             |
|---|-------------|-------------|-------------|
| H | -0.60265800 | -3.13949600 | -0.80862000 |
| H | 0.40741000  | -2.64325100 | -2.18244100 |
| C | 1.41474700  | -3.29743200 | 1.09609200  |
| H | 0.42022800  | -3.26409600 | 1.54751100  |
| H | 1.68557800  | -4.34896600 | 0.95562100  |
| H | 2.13087800  | -2.84725500 | 1.79003900  |
| C | -0.95979100 | 0.27630600  | -1.26131100 |
| O | -0.48520200 | 0.28264300  | -2.33797800 |
| O | -2.69668300 | 0.54137100  | -1.49667400 |
| H | -2.79434500 | 0.57297700  | -2.46391500 |
| C | -4.32145400 | 0.18761900  | -0.90587300 |
| O | -4.28436800 | 0.10776400  | 0.29354000  |
| O | -5.02184500 | 0.13766300  | -1.89079000 |

### TS12\_13

|    |             |             |             |
|----|-------------|-------------|-------------|
| Mn | -0.95895100 | -0.84966700 | 0.36378300  |
| N  | -0.70814400 | 0.86995300  | -0.80024700 |
| N  | 0.79587000  | -1.32257600 | -0.72065600 |
| C  | 1.52070300  | -2.44857700 | -0.66201100 |
| C  | 2.67024800  | -2.64284600 | -1.43183000 |
| C  | 3.08426200  | -1.63660800 | -2.30216300 |
| C  | 2.33339200  | -0.46149000 | -2.37414400 |
| C  | 0.33967800  | 0.82986400  | -1.54323900 |
| C  | 1.20515200  | -0.34846600 | -1.56820400 |
| H  | 1.17791700  | -3.21885300 | 0.01814100  |
| H  | 3.21959300  | -3.57297900 | -1.34029800 |
| H  | 3.97183200  | -1.76057700 | -2.91332600 |
| H  | 2.60942400  | 0.35353300  | -3.03269200 |
| C  | -1.96995300 | -1.61176900 | -0.97482700 |
| O  | -2.60771900 | -2.09449800 | -1.80201600 |
| C  | -2.45405900 | -0.29218400 | 1.22527800  |
| C  | -0.96355400 | -2.39500900 | 1.31155400  |
| O  | -3.40698600 | 0.04156500  | 1.78565000  |
| O  | -0.97156800 | -3.37496200 | 1.92296800  |
| O  | 0.62535000  | 1.89057400  | -2.30200200 |
| C  | -0.43966800 | 2.86400400  | -2.05428500 |
| C  | -1.37233700 | 2.19338600  | -0.99385800 |
| H  | 0.03415100  | 3.77881700  | -1.69486900 |
| H  | -0.93665300 | 3.05010500  | -3.00807600 |
| C  | -1.37885600 | 2.98423400  | 0.32208200  |
| H  | -1.77581500 | 3.98859500  | 0.14168000  |
| H  | -2.01261000 | 2.50290100  | 1.07091300  |
| H  | -0.36720300 | 3.07765700  | 0.72679600  |
| C  | -2.79413400 | 2.00338600  | -1.53984500 |

|   |             |             |             |
|---|-------------|-------------|-------------|
| H | -3.43291100 | 1.49604900  | -0.81251200 |
| H | -3.23892700 | 2.98090700  | -1.75318600 |
| H | -2.78480000 | 1.42016400  | -2.46562000 |
| C | 0.12378000  | -0.01779900 | 1.86500200  |
| O | 1.63426300  | 0.77179200  | 1.16947000  |
| O | 0.09891500  | 0.11988400  | 3.03418900  |
| H | 1.59342100  | 1.07104400  | 3.46560800  |
| C | 2.55061500  | 1.41992100  | 1.83164500  |
| O | 3.53880200  | 1.94533400  | 1.31640100  |
| O | 2.41027300  | 1.52561000  | 3.18562200  |

### 13

|    |             |             |             |
|----|-------------|-------------|-------------|
| Mn | -0.08783500 | 0.06109400  | 0.67916900  |
| C  | -0.94002500 | 0.14183700  | -1.01234200 |
| O  | -1.39739500 | 0.20797200  | -2.05672400 |
| N  | 1.46367100  | -1.03355000 | -0.21765500 |
| N  | 1.21105000  | 1.60450000  | 0.02008300  |
| C  | 1.04492300  | 2.92854400  | 0.15839700  |
| C  | 1.97496800  | 3.85334300  | -0.32254400 |
| C  | 3.12032600  | 3.39593900  | -0.97001300 |
| C  | 3.30337600  | 2.01944700  | -1.11885400 |
| C  | 2.39912100  | -0.29327900 | -0.70325400 |
| C  | 2.32918200  | 1.16552100  | -0.61212600 |
| H  | 0.14856600  | 3.26271500  | 0.66590900  |
| H  | 1.78878900  | 4.91205500  | -0.18341000 |
| H  | 3.85799200  | 4.09274900  | -1.35281200 |
| H  | 4.17516200  | 1.60852300  | -1.61391300 |
| C  | 0.85414300  | 0.01266200  | 2.30571900  |
| O  | 1.42853800  | -0.00816800 | 3.29525600  |
| C  | -1.09325100 | -1.38754300 | 1.17554100  |
| C  | -1.32788500 | 1.19612600  | 1.40168500  |
| O  | -1.71380800 | -2.29570100 | 1.50838800  |
| O  | -2.09320700 | 1.91450000  | 1.87104700  |
| O  | 3.43766000  | -0.88292000 | -1.29037600 |
| C  | 3.18373600  | -2.32498500 | -1.21634800 |
| C  | 1.82483900  | -2.46626800 | -0.45611100 |
| H  | 4.02452500  | -2.77344000 | -0.68541200 |
| H  | 3.14430800  | -2.69713700 | -2.24123700 |
| C  | 2.00521200  | -3.19611700 | 0.88184800  |
| H  | 1.06474600  | -3.24735900 | 1.43605700  |
| H  | 2.34071000  | -4.22127000 | 0.69553900  |
| H  | 2.75373500  | -2.69726600 | 1.50438700  |
| C  | 0.76405100  | -3.14835600 | -1.33026800 |
| H  | 1.08598000  | -4.16824700 | -1.56357100 |

|   |             |             |             |
|---|-------------|-------------|-------------|
| H | -0.19696000 | -3.21248400 | -0.81414900 |
| H | 0.62298900  | -2.60918100 | -2.27145400 |
| O | -3.98938000 | -0.43258900 | -0.11899200 |
| C | -4.89193300 | 0.17218000  | -0.73751600 |
| O | -5.03749900 | 1.40194500  | -0.96240000 |
| O | -5.89901800 | -0.66788300 | -1.26173400 |
| H | -6.52954500 | -0.08522900 | -1.71075100 |

**TS13\_14**

|    |             |             |             |
|----|-------------|-------------|-------------|
| Mn | -0.17945500 | -0.28806200 | 0.86451200  |
| C  | -0.89382500 | 0.24283900  | -2.15094400 |
| O  | -1.33021400 | 0.23827300  | -3.20289600 |
| N  | 1.51834000  | -0.71574300 | -0.23812100 |
| N  | 0.51091100  | 1.64815900  | 0.42516000  |
| C  | -0.03978000 | 2.81977700  | 0.77369400  |
| C  | 0.51416200  | 4.04879600  | 0.40240300  |
| C  | 1.68099900  | 4.06803900  | -0.35681500 |
| C  | 2.26494300  | 2.85205500  | -0.72455500 |
| C  | 2.15140200  | 0.33703400  | -0.62790400 |
| C  | 1.64951200  | 1.67608100  | -0.31298800 |
| H  | -0.94584300 | 2.78006400  | 1.36538200  |
| H  | 0.02567300  | 4.96575300  | 0.71138000  |
| H  | 2.13222200  | 5.00691000  | -0.65902800 |
| H  | 3.17239800  | 2.80939000  | -1.31513900 |
| C  | 0.67918900  | -0.36621900 | 2.42646000  |
| O  | 1.25287400  | -0.40176700 | 3.42826700  |
| C  | -0.76584200 | -2.01388900 | 1.02500800  |
| C  | -1.71518000 | 0.27673300  | 1.69226300  |
| O  | -1.14910700 | -3.09160700 | 1.15709300  |
| O  | -2.64990600 | 0.61611100  | 2.27262700  |
| O  | 3.27661400  | 0.18559300  | -1.32064500 |
| C  | 3.48722200  | -1.26009500 | -1.44638900 |
| C  | 2.29138900  | -1.91675600 | -0.68367100 |
| H  | 4.45903000  | -1.48315700 | -1.00375200 |
| H  | 3.49789700  | -1.49128200 | -2.51267700 |
| C  | 2.77347000  | -2.71557900 | 0.53523300  |
| H  | 1.93065000  | -3.13734500 | 1.08902000  |
| H  | 3.40600600  | -3.54472000 | 0.20215800  |
| H  | 3.35849400  | -2.08610600 | 1.21232500  |
| C  | 1.44258500  | -2.78461900 | -1.62171700 |
| H  | 2.04720500  | -3.61731900 | -1.99532100 |
| H  | 0.57898900  | -3.20363300 | -1.10056300 |
| H  | 1.08705100  | -2.20605700 | -2.47878900 |
| O  | -2.84542100 | -0.86328900 | -0.59747000 |

|   |             |             |             |
|---|-------------|-------------|-------------|
| C | -3.83247100 | -0.14153900 | -0.88996000 |
| O | -3.92399200 | 1.10689900  | -0.95375300 |
| O | -4.99539200 | -0.86999900 | -1.19254300 |
| H | -5.67846900 | -0.21549800 | -1.40323400 |

**14**

|    |             |             |             |
|----|-------------|-------------|-------------|
| Mn | 0.14489600  | -0.90826800 | -0.49870400 |
| N  | -1.37345100 | 0.44538200  | 0.02521700  |
| N  | 1.18588700  | 0.93805900  | -0.53126300 |
| C  | 2.47539300  | 1.14754000  | -0.82846300 |
| C  | 3.06725800  | 2.41170900  | -0.75555900 |
| C  | 2.29615900  | 3.50165300  | -0.35756700 |
| C  | 0.95041800  | 3.29466400  | -0.04560700 |
| C  | -0.95250800 | 1.65372200  | 0.13646800  |
| C  | 0.44137800  | 2.00295800  | -0.14660800 |
| H  | 3.05334500  | 0.28275100  | -1.12950200 |
| H  | 4.11551600  | 2.52362800  | -1.00851800 |
| H  | 2.72915200  | 4.49404000  | -0.29127500 |
| H  | 0.30536300  | 4.10698000  | 0.26777900  |
| C  | -0.29626200 | -0.77493800 | -2.24115600 |
| O  | -0.57408400 | -0.67876600 | -3.36059300 |
| C  | -0.83248400 | -2.41760300 | -0.28153700 |
| C  | 1.59640500  | -1.91834000 | -0.93079400 |
| O  | -1.42962900 | -3.39570700 | -0.12940900 |
| O  | 2.47130300  | -2.57963200 | -1.29442100 |
| O  | -1.82009100 | 2.60243500  | 0.50705600  |
| C  | -3.12000600 | 1.93665000  | 0.61166700  |
| C  | -2.82097700 | 0.41989600  | 0.38668500  |
| H  | -3.76424100 | 2.36533700  | -0.15899300 |
| H  | -3.52197800 | 2.15815700  | 1.60113000  |
| C  | -3.65345000 | -0.15188000 | -0.76751200 |
| H  | -3.41495700 | -1.20454600 | -0.94005200 |
| H  | -4.71854300 | -0.08254000 | -0.52319600 |
| H  | -3.47535200 | 0.40400500  | -1.69278500 |
| C  | -3.02349000 | -0.38808300 | 1.67725100  |
| H  | -4.07904900 | -0.35633100 | 1.96685700  |
| H  | -2.73979900 | -1.43329800 | 1.53575500  |
| H  | -2.42529600 | 0.02456000  | 2.49438700  |
| C  | 1.65231400  | -1.06433200 | 2.10650100  |
| O  | 2.74123000  | -1.37170200 | 1.60781500  |
| O  | 0.52152300  | -0.86895200 | 1.53758700  |
| O  | 1.61916800  | -0.89771700 | 3.47997900  |
| H  | 0.71015000  | -0.66150800 | 3.72161200  |

## [Mn(benzox)(CO)<sub>3</sub>Br]

### Cat2

|    |             |             |             |
|----|-------------|-------------|-------------|
| Mn | -0.81812500 | -0.86372300 | 0.47153300  |
| N  | -1.51091200 | 1.13811800  | 0.29651100  |
| C  | -2.77881400 | 1.57124500  | 0.34551000  |
| C  | -3.12290900 | 2.91525100  | 0.18341400  |
| C  | -2.11630100 | 3.85427100  | -0.03975500 |
| C  | -0.79167800 | 3.42026700  | -0.09036400 |
| C  | -0.53688900 | 2.06016300  | 0.08111300  |
| H  | -3.54377000 | 0.82436700  | 0.52012800  |
| H  | -4.16585000 | 3.20668200  | 0.23351700  |
| H  | -2.35489800 | 4.90440900  | -0.16927000 |
| H  | 0.02798500  | 4.10927600  | -0.25820100 |
| C  | -0.75249200 | -0.75436400 | 2.26617700  |
| O  | -0.71314900 | -0.68999200 | 3.42039100  |
| C  | -0.07346300 | -2.51502500 | 0.45470200  |
| C  | -2.47524600 | -1.59637000 | 0.48696600  |
| O  | 0.38556700  | -3.57503200 | 0.43005400  |
| O  | -3.52776500 | -2.07308200 | 0.48255400  |
| Br | -0.91423000 | -0.99471300 | -2.12643700 |
| N  | 0.96914100  | 0.18518700  | 0.25404800  |
| C  | 0.78400000  | 1.46692600  | 0.06809300  |
| C  | 2.35099600  | -0.00248700 | 0.18259800  |
| C  | 3.16292500  | -1.13520800 | 0.30647700  |
| H  | 2.74671100  | -2.11733900 | 0.49456500  |
| C  | 4.53866800  | -0.94298300 | 0.17631100  |
| H  | 5.20197600  | -1.79724000 | 0.26572400  |
| C  | 5.09348400  | 0.33075800  | -0.06763800 |
| H  | 6.16999500  | 0.43080000  | -0.16099000 |
| C  | 4.29186900  | 1.46941700  | -0.19200000 |
| H  | 4.70465800  | 2.45413400  | -0.37842600 |
| C  | 2.92917200  | 1.25268600  | -0.05971500 |
| O  | 1.90995000  | 2.18342100  | -0.12991500 |

### 1

|    |             |             |             |
|----|-------------|-------------|-------------|
| Mn | -0.90302100 | -1.08659100 | -0.11138000 |
| N  | -1.72522000 | 0.83980400  | -0.10437800 |
| C  | -3.03076900 | 1.17783500  | -0.07344300 |
| C  | -3.47122600 | 2.49737900  | -0.04409400 |
| C  | -2.53114700 | 3.53677500  | -0.04290100 |
| C  | -1.17910000 | 3.21364400  | -0.06482000 |
| C  | -0.81757400 | 1.86209800  | -0.09374700 |



|   |             |             |             |
|---|-------------|-------------|-------------|
| H | -3.73945800 | 0.35832100  | -0.07252100 |
| H | -4.53574000 | 2.70200600  | -0.02468200 |
| H | -2.84933400 | 4.57360300  | -0.02254300 |
| H | -0.40976000 | 3.97754800  | -0.05815600 |
| C | -1.14932900 | -1.53487400 | 1.60539000  |
| O | -1.32532000 | -1.85811100 | 2.71282100  |
| C | -0.03757800 | -2.59993900 | -0.53732000 |
| C | -2.41811000 | -1.84008800 | -0.71189200 |
| O | 0.50508100  | -3.59898800 | -0.80211200 |
| O | -3.40077700 | -2.34385900 | -1.09150500 |
| N | 0.78530100  | 0.07629300  | -0.10233600 |
| C | 0.53123400  | 1.37012600  | -0.09756600 |
| C | 2.18241600  | -0.01720800 | -0.06734600 |
| C | 3.05699700  | -1.10790100 | -0.04390500 |
| H | 2.69230500  | -2.12788000 | -0.05160000 |
| C | 4.42439300  | -0.82546800 | -0.01037300 |
| H | 5.13334100  | -1.64712900 | 0.00864700  |
| C | 4.91002900  | 0.49751600  | -0.00021000 |
| H | 5.98118100  | 0.67009100  | 0.02525200  |
| C | 4.04389000  | 1.59593600  | -0.02115400 |
| H | 4.40265600  | 2.61885700  | -0.01148000 |
| C | 2.69258500  | 1.28928500  | -0.05257800 |
| O | 1.62595300  | 2.16795800  | -0.07241300 |

## 2

|    |             |             |             |
|----|-------------|-------------|-------------|
| Mn | -0.88521400 | -1.07167600 | -0.05451400 |
| N  | -1.72799800 | 0.76353900  | -0.11649000 |
| C  | -3.06094700 | 1.08506700  | -0.08897800 |
| C  | -3.54925700 | 2.37045300  | -0.05750700 |
| C  | -2.64136900 | 3.47282400  | -0.03954900 |
| C  | -1.29439000 | 3.20496300  | -0.05125300 |
| C  | -0.84689700 | 1.85590500  | -0.08851600 |
| H  | -3.74441500 | 0.24328400  | -0.09515000 |
| H  | -4.62249600 | 2.53018200  | -0.04586200 |
| H  | -3.00865400 | 4.49385000  | -0.01252300 |
| H  | -0.55536000 | 4.00025700  | -0.02926800 |
| C  | -0.94840700 | -1.62113100 | 1.61036000  |
| O  | -1.01505300 | -2.05261900 | 2.70446700  |
| C  | -0.00594700 | -2.47116300 | -0.71905600 |
| C  | -2.40075500 | -1.85276000 | -0.56711500 |
| O  | 0.55432700  | -3.41209200 | -1.14896600 |
| O  | -3.39487000 | -2.38350400 | -0.90265700 |
| N  | 0.74159600  | 0.10133000  | -0.11341700 |
| C  | 0.47428400  | 1.42140100  | -0.09189400 |

|   |            |             |             |
|---|------------|-------------|-------------|
| C | 2.13935200 | 0.02146200  | -0.07249700 |
| C | 3.02215400 | -1.06171700 | -0.04876500 |
| H | 2.65908100 | -2.08261300 | -0.06330200 |
| C | 4.39553400 | -0.78490800 | -0.00842800 |
| H | 5.10070900 | -1.61063500 | 0.00948300  |
| C | 4.88102400 | 0.53316600  | 0.01045900  |
| H | 5.95167700 | 0.71064200  | 0.04087500  |
| C | 4.00418500 | 1.62916100  | -0.00709500 |
| H | 4.36230100 | 2.65302700  | 0.01202000  |
| C | 2.65173800 | 1.33122100  | -0.04556400 |
| O | 1.60191100 | 2.22273500  | -0.05930400 |

**3**

|    |             |             |             |
|----|-------------|-------------|-------------|
| Mn | -0.79674500 | -0.82993100 | 0.52438500  |
| N  | -1.51772500 | 1.12516800  | 0.28463900  |
| C  | -2.78523100 | 1.56994200  | 0.35699400  |
| C  | -3.15477100 | 2.89603000  | 0.16911300  |
| C  | -2.13956000 | 3.85192700  | -0.11175900 |
| C  | -0.82886200 | 3.43783900  | -0.18504200 |
| C  | -0.51961600 | 2.06237200  | 0.01475400  |
| H  | -3.54175800 | 0.82241900  | 0.57443000  |
| H  | -4.19893100 | 3.17944400  | 0.23677900  |
| H  | -2.39448900 | 4.89667000  | -0.26281900 |
| H  | -0.02386400 | 4.13582000  | -0.39138500 |
| C  | -0.69960200 | -0.64277500 | 2.29144600  |
| O  | -0.63209900 | -0.50451100 | 3.44190800  |
| C  | -0.04259000 | -2.47068500 | 0.54627800  |
| C  | -2.44649900 | -1.55989200 | 0.58776500  |
| O  | 0.42110500  | -3.53315200 | 0.55788300  |
| O  | -3.50157400 | -2.03936100 | 0.62484400  |
| Br | -0.96703100 | -1.13157800 | -2.16374600 |
| N  | 0.97081300  | 0.18634500  | 0.22607600  |
| C  | 0.75873800  | 1.49626100  | -0.00302400 |
| C  | 2.34188500  | 0.01103300  | 0.16761400  |
| C  | 3.16926300  | -1.10846400 | 0.33022100  |
| H  | 2.75823000  | -2.08664000 | 0.55109100  |
| C  | 4.55343900  | -0.92245000 | 0.19833000  |
| H  | 5.21214700  | -1.77753800 | 0.32069600  |
| C  | 5.10963100  | 0.33431600  | -0.08567800 |
| H  | 6.18598200  | 0.43880100  | -0.18004900 |
| C  | 4.28951200  | 1.46710400  | -0.24995700 |
| H  | 4.69996000  | 2.44751700  | -0.46775800 |
| C  | 2.92957700  | 1.26195700  | -0.11611500 |
| O  | 1.92306200  | 2.20319000  | -0.22465300 |

**Idimer**

|    |             |             |             |
|----|-------------|-------------|-------------|
| Mn | -0.93942900 | -0.01636900 | -1.26457900 |
| N  | -1.78537300 | 1.84987600  | -0.85643900 |
| C  | -1.29411300 | 3.06336800  | -1.19010200 |
| C  | -1.98252500 | 4.24915200  | -0.96391100 |
| C  | -3.25214100 | 4.20697500  | -0.36740100 |
| C  | -3.78197900 | 2.97177900  | -0.02031800 |
| C  | -3.02461000 | 1.82129800  | -0.27735800 |
| H  | -0.31696900 | 3.07456800  | -1.65713000 |
| H  | -1.52840800 | 5.18988100  | -1.25476800 |
| H  | -3.80991300 | 5.11896700  | -0.18328500 |
| H  | -4.75988700 | 2.87866100  | 0.43873000  |
| C  | -1.59274500 | -0.05256200 | -2.90677500 |
| O  | -1.96274200 | -0.08165300 | -4.01202100 |
| C  | -0.28986100 | -1.68260600 | -1.43333000 |
| C  | 0.63905100  | 0.64400600  | -1.79613400 |
| O  | 0.11295300  | -2.75837500 | -1.62937200 |
| O  | 1.63034800  | 1.05990400  | -2.25356700 |
| N  | -2.67963300 | -0.54740000 | -0.30895500 |
| C  | -3.44314600 | 0.48109200  | 0.00229800  |
| C  | -3.42496800 | -1.67399000 | 0.05994400  |
| C  | -3.17250600 | -3.04641500 | -0.03031500 |
| H  | -2.24801900 | -3.42639600 | -0.44661100 |
| C  | -4.16425400 | -3.90928700 | 0.44170000  |
| H  | -4.00169300 | -4.98114800 | 0.38738800  |
| C  | -5.37014100 | -3.42673900 | 0.98799800  |
| H  | -6.11311500 | -4.13334000 | 1.34393400  |
| C  | -5.63458000 | -2.05583500 | 1.08042600  |
| H  | -6.55918400 | -1.66962400 | 1.49441100  |
| C  | -4.63660200 | -1.22026900 | 0.60316300  |
| O  | -4.63905700 | 0.15950300  | 0.56055700  |
| Mn | 0.93925300  | -0.01551800 | 1.26417700  |
| N  | 1.78641800  | 1.85007000  | 0.85546600  |
| C  | 1.29583000  | 3.06395500  | 1.18866300  |
| C  | 1.98517500  | 4.24922900  | 0.96261300  |
| C  | 3.25507800  | 4.20606800  | 0.36680000  |
| C  | 3.78423800  | 2.97044500  | 0.02018300  |
| C  | 3.02591200  | 1.82053800  | 0.27695300  |
| H  | 0.31847100  | 3.07591100  | 1.65521800  |
| H  | 1.53155400  | 5.19032400  | 1.25306300  |
| H  | 3.81359900  | 5.11763700  | 0.18286000  |
| H  | 4.76232900  | 2.87657100  | -0.43832100 |
| C  | 1.59262200  | -0.05166400 | 2.90634900  |

|   |             |             |             |
|---|-------------|-------------|-------------|
| O | 1.96269300  | -0.08069200 | 4.01157300  |
| C | 0.28845600  | -1.68118500 | 1.43336600  |
| C | -0.63869700 | 0.64607400  | 1.79577100  |
| O | -0.11501300 | -2.75665000 | 1.62983200  |
| O | -1.62978800 | 1.06259500  | 2.25308700  |
| N | 2.67920300  | -0.54789700 | 0.30887700  |
| C | 3.44361200  | 0.47997300  | -0.00224800 |
| C | 3.42391200  | -1.67510800 | -0.05940900 |
| C | 3.17030800  | -3.04733000 | 0.03082900  |
| H | 2.24516000  | -3.42648700 | 0.44640600  |
| C | 4.16165100  | -3.91103100 | -0.44050800 |
| H | 3.99822600  | -4.98276000 | -0.38618100 |
| C | 5.36822000  | -3.42947900 | -0.98617800 |
| H | 6.11086500  | -4.13669700 | -1.34157800 |
| C | 5.63374200  | -2.05879100 | -1.07870900 |
| H | 6.55884600  | -1.67336700 | -1.49231000 |
| C | 4.63615300  | -1.22238600 | -0.60210100 |
| O | 4.63957100  | 0.15739900  | -0.55983800 |

**TS2\_4**

|    |             |             |             |
|----|-------------|-------------|-------------|
| Mn | 0.81047800  | -0.96263100 | -0.41582800 |
| N  | 1.56606100  | 0.92219500  | -0.33040700 |
| C  | 2.86872600  | 1.31928700  | -0.44624700 |
| C  | 3.28051100  | 2.63421500  | -0.40450600 |
| C  | 2.31998400  | 3.66877300  | -0.24239000 |
| C  | 0.99245500  | 3.31465600  | -0.14176200 |
| C  | 0.63476600  | 1.94641300  | -0.19149000 |
| H  | 3.59382500  | 0.52342500  | -0.57222900 |
| H  | 4.33744600  | 2.86164100  | -0.49563900 |
| H  | 2.62493700  | 4.70960300  | -0.20688300 |
| H  | 0.21078300  | 4.05920400  | -0.02871100 |
| C  | 0.67153100  | -1.39256800 | -2.11645900 |
| O  | 0.59722100  | -1.75017700 | -3.23408200 |
| C  | 0.07057800  | -2.43113200 | 0.26790900  |
| C  | 2.41577900  | -1.70462200 | -0.20801900 |
| O  | -0.39753000 | -3.41834300 | 0.70127700  |
| O  | 3.46549000  | -2.20790600 | -0.06624700 |
| N  | -0.87676300 | 0.11817200  | -0.20494900 |
| C  | -0.66947600 | 1.43314000  | -0.11857000 |
| C  | -2.26474100 | -0.03350000 | -0.13298500 |
| C  | -3.09534600 | -1.15660700 | -0.18410000 |
| H  | -2.68629300 | -2.15386400 | -0.29715300 |
| C  | -4.47585800 | -0.94686000 | -0.08194000 |
| H  | -5.14469800 | -1.80152700 | -0.11791000 |

|   |             |             |            |
|---|-------------|-------------|------------|
| C | -5.01763000 | 0.34236900  | 0.06581500 |
| H | -6.09350500 | 0.46523800  | 0.14270500 |
| C | -4.19405300 | 1.47673900  | 0.11334600 |
| H | -4.59721000 | 2.47772400  | 0.22285300 |
| C | -2.83207400 | 1.24460100  | 0.00880900 |
| O | -1.81793400 | 2.17887800  | 0.01815100 |
| C | 1.06312700  | -0.53629300 | 2.50065800 |
| O | 0.37483200  | 0.42664500  | 2.62422000 |
| O | 1.78517200  | -1.40783800 | 2.87764600 |

4

|    |             |             |             |
|----|-------------|-------------|-------------|
| Mn | -0.85995600 | -0.97030000 | 0.26208700  |
| N  | -1.60635500 | 0.98320900  | 0.24630200  |
| C  | -2.88850600 | 1.38485700  | 0.33645300  |
| C  | -3.27287100 | 2.71985700  | 0.25195000  |
| C  | -2.29338300 | 3.70528800  | 0.07130400  |
| C  | -0.96218100 | 3.31437600  | -0.00958100 |
| C  | -0.66114800 | 1.94984300  | 0.07955200  |
| H  | -3.62826400 | 0.60536200  | 0.47710500  |
| H  | -4.32358500 | 2.97726000  | 0.32676800  |
| H  | -2.56587900 | 4.75325900  | 0.00295100  |
| H  | -0.16266800 | 4.03551200  | -0.13738000 |
| C  | -0.91113400 | -1.16464800 | 2.04805600  |
| O  | -0.97181700 | -1.36627500 | 3.19616900  |
| C  | -0.05880000 | -2.53702200 | -0.03681100 |
| C  | -2.46481000 | -1.70583400 | -0.00095500 |
| O  | 0.45175500  | -3.56393500 | -0.24872500 |
| O  | -3.50954000 | -2.19019000 | -0.18466600 |
| N  | 0.88519500  | 0.11972300  | 0.21580600  |
| C  | 0.66693200  | 1.40180400  | 0.04887700  |
| C  | 2.27324200  | -0.02252100 | 0.17737400  |
| C  | 3.11430400  | -1.13347100 | 0.30021000  |
| H  | 2.71667900  | -2.12930900 | 0.45571700  |
| C  | 4.48958200  | -0.90439100 | 0.21347300  |
| H  | 5.17230300  | -1.74345200 | 0.30440200  |
| C  | 5.01583600  | 0.38711600  | 0.01060400  |
| H  | 6.09137200  | 0.51942200  | -0.05081000 |
| C  | 4.18360600  | 1.50579400  | -0.11196400 |
| H  | 4.57485500  | 2.50517900  | -0.26594100 |
| C  | 2.82360600  | 1.25314300  | -0.02217100 |
| O  | 1.78528000  | 2.16022200  | -0.09886700 |
| C  | -0.81579400 | -0.78451800 | -1.96836700 |
| O  | -0.39521200 | 0.32016200  | -2.39642400 |
| O  | -1.20530000 | -1.76052100 | -2.67095800 |

## 5

|    |             |             |             |
|----|-------------|-------------|-------------|
| Mn | 0.73740400  | 0.64252100  | 1.19700300  |
| N  | 1.34480400  | 2.05087300  | -0.24042500 |
| C  | 1.00080900  | 3.34761300  | -0.32954200 |
| C  | 1.41235300  | 4.17016800  | -1.37631800 |
| C  | 2.22453500  | 3.63933600  | -2.38420500 |
| C  | 2.60209500  | 2.30278600  | -2.30299300 |
| C  | 2.14024000  | 1.54633600  | -1.22132300 |
| H  | 0.37240600  | 3.73607000  | 0.46327500  |
| H  | 1.09719000  | 5.20748300  | -1.39415300 |
| H  | 2.55945100  | 4.25717500  | -3.21074800 |
| H  | 3.23822000  | 1.84352300  | -3.05115000 |
| C  | 1.95122300  | 1.16181400  | 2.42978400  |
| O  | 2.68315600  | 1.49018000  | 3.27448600  |
| C  | 0.14994800  | -0.74189900 | 2.16116400  |
| C  | -0.56115500 | 1.68299400  | 1.84814200  |
| O  | -0.25206400 | -1.64079800 | 2.78319700  |
| O  | -1.41842200 | 2.35122000  | 2.26635200  |
| N  | 2.07577100  | -0.47015800 | 0.08459000  |
| C  | 2.47852100  | 0.16546300  | -0.98670800 |
| C  | 2.63781200  | -1.74405300 | -0.01249100 |
| C  | 2.58051600  | -2.86972400 | 0.81602600  |
| H  | 2.01416900  | -2.86494000 | 1.73972200  |
| C  | 3.28521000  | -4.00160300 | 0.40050500  |
| H  | 3.26388600  | -4.89402600 | 1.01810100  |
| C  | 4.02358400  | -4.01818100 | -0.80013200 |
| H  | 4.55600700  | -4.92030900 | -1.08417300 |
| C  | 4.08815100  | -2.89773100 | -1.63594000 |
| H  | 4.65350900  | -2.89575800 | -2.56103000 |
| C  | 3.38117600  | -1.78707200 | -1.20209400 |
| O  | 3.27482300  | -0.55473600 | -1.81660400 |
| C  | -0.73535200 | 0.02084100  | -0.28276500 |
| O  | -1.93311800 | -0.24214200 | 0.10662600  |
| O  | -0.36060000 | -0.05381400 | -1.47806100 |
| H  | -2.98341500 | -0.70535300 | -0.93453500 |
| C  | -5.89437300 | -0.67659400 | -0.49386400 |
| C  | -4.72645100 | -1.62994700 | -0.72481700 |
| F  | -6.49805700 | -0.29974900 | -1.65199700 |
| F  | -6.85615600 | -1.25897600 | 0.27641800  |
| F  | -5.52582200 | 0.46801300  | 0.13801400  |
| O  | -3.73934000 | -1.05740300 | -1.53090300 |
| H  | -4.35086100 | -1.91608500 | 0.26645200  |
| H  | -5.14791500 | -2.52275700 | -1.20321400 |

**TS5\_6**

|    |             |             |             |
|----|-------------|-------------|-------------|
| Mn | -2.26932800 | -0.35999900 | 1.36281400  |
| N  | -2.28081600 | -2.14901500 | 0.24420900  |
| C  | -2.02650100 | -3.39544100 | 0.67550600  |
| C  | -1.99154200 | -4.49824700 | -0.17729100 |
| C  | -2.23378500 | -4.31447300 | -1.54137600 |
| C  | -2.50933300 | -3.03079700 | -2.00487500 |
| C  | -2.51977400 | -1.98140500 | -1.08261700 |
| H  | -1.84237900 | -3.51245500 | 1.73691600  |
| H  | -1.77702900 | -5.47979700 | 0.23020700  |
| H  | -2.21298700 | -5.15468400 | -2.22732500 |
| H  | -2.71286400 | -2.83366400 | -3.05121300 |
| C  | -3.95992900 | -0.59385800 | 1.97948100  |
| O  | -5.02357900 | -0.72403400 | 2.42981800  |
| C  | -2.09642800 | 1.26630900  | 2.08928400  |
| C  | -1.51627800 | -1.11240100 | 2.80090600  |
| O  | -1.96317600 | 2.31937200  | 2.56444100  |
| O  | -1.01253000 | -1.59441900 | 3.73180300  |
| N  | -2.88262000 | 0.32378300  | -0.49567600 |
| C  | -2.82149900 | -0.60833600 | -1.41142100 |
| C  | -3.23803300 | 1.48739700  | -1.17955800 |
| C  | -3.46104500 | 2.80284400  | -0.75883000 |
| H  | -3.36423100 | 3.08990100  | 0.28138900  |
| C  | -3.81553800 | 3.73123700  | -1.73958200 |
| H  | -3.99676600 | 4.76184900  | -1.45112800 |
| C  | -3.94477100 | 3.36795900  | -3.09573800 |
| H  | -4.22221100 | 4.12357300  | -3.82372600 |
| C  | -3.72483600 | 2.05546600  | -3.52724600 |
| H  | -3.82177700 | 1.76181300  | -4.56631700 |
| C  | -3.37437600 | 1.15253100  | -2.53551400 |
| O  | -3.10775800 | -0.19624000 | -2.67003700 |
| C  | -0.29058000 | -0.09909900 | 0.61397800  |
| O  | 0.63292700  | 0.34439000  | 1.44093200  |
| O  | -0.02229500 | -0.36958000 | -0.57306400 |
| H  | 1.75428700  | 0.45719400  | 0.98636100  |
| C  | 3.69194700  | 2.86865800  | 0.68643800  |
| C  | 3.56777100  | 1.54052500  | 1.42616800  |
| F  | 2.48478700  | 3.41344600  | 0.37727000  |
| F  | 4.35571600  | 3.79354800  | 1.43835300  |
| F  | 4.37397000  | 2.75931900  | -0.48436800 |
| O  | 2.91129100  | 0.58497700  | 0.65870800  |
| H  | 4.59385500  | 1.23548600  | 1.67948300  |
| H  | 3.04462500  | 1.76432200  | 2.36908000  |

|   |            |             |             |
|---|------------|-------------|-------------|
| C | 6.03624000 | -1.47369000 | -1.11883700 |
| C | 4.54882100 | -1.79415100 | -1.01722700 |
| F | 6.80040100 | -2.29868900 | -0.35659100 |
| F | 6.47663400 | -1.60339900 | -2.40084500 |
| F | 6.32837200 | -0.20620900 | -0.72758100 |
| O | 4.08815400 | -1.69669700 | 0.30043300  |
| H | 3.65673900 | -0.79528000 | 0.44508400  |
| H | 4.02745900 | -1.11373100 | -1.70214700 |
| H | 4.42415900 | -2.81840600 | -1.38704000 |

**6**

|    |             |             |             |
|----|-------------|-------------|-------------|
| Mn | 0.87587600  | -0.95014100 | -0.24943300 |
| N  | 1.58416000  | 1.04914700  | -0.19463600 |
| C  | 2.85672800  | 1.47120000  | -0.24590300 |
| C  | 3.20876200  | 2.81871500  | -0.15341900 |
| C  | 2.20528700  | 3.77683200  | -0.00252200 |
| C  | 0.87761400  | 3.35572400  | 0.04698100  |
| C  | 0.61425600  | 1.98880500  | -0.05105100 |
| H  | 3.61797100  | 0.70916900  | -0.36318400 |
| H  | 4.25484800  | 3.09955000  | -0.19988300 |
| H  | 2.45041100  | 4.83091200  | 0.07169900  |
| H  | 0.06015200  | 4.05887700  | 0.15743900  |
| C  | 0.87840900  | -0.96943900 | -2.07784000 |
| O  | 0.89470300  | -1.01676200 | -3.23391700 |
| C  | 0.11351700  | -2.57447400 | -0.13974700 |
| C  | 2.51347100  | -1.68423300 | -0.14852500 |
| O  | -0.36690600 | -3.62653100 | -0.05645900 |
| O  | 3.56741200  | -2.16199700 | -0.07178200 |
| N  | -0.90708200 | 0.12401300  | -0.17593600 |
| C  | -0.71137700 | 1.40943400  | -0.03676900 |
| C  | -2.29235000 | -0.04447000 | -0.13594700 |
| C  | -3.11364500 | -1.17308700 | -0.23307500 |
| H  | -2.70215200 | -2.16620900 | -0.36668900 |
| C  | -4.49071300 | -0.96194900 | -0.15146100 |
| H  | -5.16084300 | -1.81266700 | -0.22280300 |
| C  | -5.03742400 | 0.32658400  | 0.02144100  |
| H  | -6.11494500 | 0.44185900  | 0.07948600  |
| C  | -4.22607400 | 1.46138700  | 0.11878800  |
| H  | -4.63297900 | 2.45742300  | 0.25034800  |
| C  | -2.86254100 | 1.22610200  | 0.03477600  |
| O  | -1.83542900 | 2.14852000  | 0.09427600  |
| C  | 0.84295600  | -0.83461500 | 1.82318100  |
| O  | 1.27371200  | -1.95388300 | 2.51119200  |
| O  | 0.48218400  | 0.12570900  | 2.49974700  |



|   |            |             |            |
|---|------------|-------------|------------|
| H | 1.20443200 | -1.75306100 | 3.46551700 |
|---|------------|-------------|------------|

7

|    |             |             |             |
|----|-------------|-------------|-------------|
| Mn | -0.87758600 | -0.93778400 | 0.26609200  |
| N  | -1.59438200 | 1.05345300  | 0.11183100  |
| C  | -2.86114100 | 1.49392700  | 0.11794800  |
| C  | -3.22149500 | 2.83572000  | 0.02460700  |
| C  | -2.18772100 | 3.80687600  | -0.08075500 |
| C  | -0.87434100 | 3.39484300  | -0.08680600 |
| C  | -0.57681900 | 2.00338400  | 0.01096100  |
| H  | -3.63029800 | 0.73157700  | 0.20091400  |
| H  | -4.26858100 | 3.11640500  | 0.03319600  |
| H  | -2.43106800 | 4.86299100  | -0.15405900 |
| H  | -0.05774600 | 4.10563400  | -0.16389800 |
| C  | -0.83551000 | -0.78321600 | 2.08159200  |
| O  | -0.82275500 | -0.70922100 | 3.23929700  |
| C  | -0.11842100 | -2.55903200 | 0.28332700  |
| C  | -2.51517600 | -1.65721300 | 0.26618500  |
| O  | 0.36102100  | -3.61920800 | 0.28975300  |
| O  | -3.57840600 | -2.13057900 | 0.25848300  |
| N  | 0.92021200  | 0.11516300  | 0.11493500  |
| C  | 0.70153000  | 1.43959800  | 0.01372300  |
| C  | 2.28843700  | -0.04767800 | 0.07894200  |
| C  | 3.11842100  | -1.17739500 | 0.14532500  |
| H  | 2.70492800  | -2.17441500 | 0.24496900  |
| C  | 4.50558700  | -0.97469400 | 0.07927900  |
| H  | 5.16483000  | -1.83694600 | 0.12924700  |
| C  | 5.06429300  | 0.30582300  | -0.04928300 |
| H  | 6.14254700  | 0.42230200  | -0.09706300 |
| C  | 4.24176100  | 1.44918600  | -0.11683300 |
| H  | 4.65390800  | 2.44808400  | -0.21567500 |
| C  | 2.87985600  | 1.22900500  | -0.05032200 |
| O  | 1.87106900  | 2.17252000  | -0.09221200 |
| C  | -0.89625300 | -1.00194100 | -1.80965900 |
| O  | -1.33304300 | -2.19906000 | -2.37812900 |
| O  | -0.57388400 | -0.12325200 | -2.60702200 |
| H  | -1.28973600 | -2.08410100 | -3.34802700 |

8

|    |             |             |             |
|----|-------------|-------------|-------------|
| Mn | -0.47405800 | -0.73148900 | 0.76330700  |
| N  | -2.01835700 | -1.84130900 | -0.17916500 |
| C  | -2.12707400 | -3.16985800 | -0.33122500 |
| C  | -3.19806300 | -3.79809200 | -0.96055800 |
| C  | -4.24939700 | -2.98908000 | -1.47351600 |

|   |             |             |             |
|---|-------------|-------------|-------------|
| C | -4.17615900 | -1.62163600 | -1.33446600 |
| C | -3.04812600 | -1.04367900 | -0.68091000 |
| H | -1.31231500 | -3.76442900 | 0.07117800  |
| H | -3.21519500 | -4.87843500 | -1.04839500 |
| H | -5.10193600 | -3.44465800 | -1.96897800 |
| H | -4.95888000 | -0.97120100 | -1.71153800 |
| C | -1.37144700 | -0.84708800 | 2.34799100  |
| O | -1.92378700 | -0.92741400 | 3.36361000  |
| C | 0.77736200  | 0.35662300  | 1.43787300  |
| C | 0.51069100  | -2.18527600 | 1.11591000  |
| O | 1.59698800  | 1.05830700  | 1.87310400  |
| O | 1.14742400  | -3.13178000 | 1.34242800  |
| N | -1.74474700 | 0.80783500  | 0.14950800  |
| C | -2.83294600 | 0.32159300  | -0.47672400 |
| C | -1.88651800 | 2.17956900  | 0.14738600  |
| C | -1.09121100 | 3.22362100  | 0.64358200  |
| H | -0.15444200 | 3.02550800  | 1.15148200  |
| C | -1.54903300 | 4.53774700  | 0.46152100  |
| H | -0.94720800 | 5.35996200  | 0.83870700  |
| C | -2.75785800 | 4.81982300  | -0.19237900 |
| H | -3.07828100 | 5.84980200  | -0.31453600 |
| C | -3.56656100 | 3.78013700  | -0.69513100 |
| H | -4.50468600 | 3.97674200  | -1.20373000 |
| C | -3.09878200 | 2.49436900  | -0.50618600 |
| O | -3.69864600 | 1.31378500  | -0.90141300 |
| C | 0.41768500  | -0.58938800 | -1.10108600 |
| O | 1.82753800  | -0.72872600 | -1.14871500 |
| O | -0.10440500 | -0.40042900 | -2.19243100 |
| H | 2.08975200  | -0.63994400 | -2.08599600 |
| C | 5.63707200  | 0.46867800  | -0.60808400 |
| C | 4.76461700  | 0.12524000  | 0.59416000  |
| F | 4.91798900  | 0.57429900  | -1.75621600 |
| F | 6.26936700  | 1.65786600  | -0.42360400 |
| F | 6.59911100  | -0.46008000 | -0.83798000 |
| O | 4.10453600  | -1.10466000 | 0.42557500  |
| H | 3.27627300  | -0.96714500 | -0.08108900 |
| H | 5.42660200  | 0.05368200  | 1.46189400  |
| H | 4.07258600  | 0.96041300  | 0.74992300  |

#### TS8\_9

|    |             |             |             |
|----|-------------|-------------|-------------|
| Mn | -0.58922800 | -0.67192400 | 0.68079700  |
| N  | -2.11368500 | -1.88107600 | -0.15465800 |
| C  | -2.15389300 | -3.22104300 | -0.26586400 |
| C  | -3.21812400 | -3.91924300 | -0.82184100 |

|   |             |             |             |
|---|-------------|-------------|-------------|
| C | -4.33714000 | -3.18356000 | -1.30256400 |
| C | -4.33298300 | -1.81115600 | -1.20659900 |
| C | -3.20871200 | -1.15394000 | -0.62809800 |
| H | -1.28896800 | -3.75823400 | 0.11004400  |
| H | -3.18114500 | -5.00091300 | -0.87961500 |
| H | -5.18598800 | -3.69956000 | -1.74110800 |
| H | -5.16692900 | -1.21477800 | -1.56201400 |
| C | -1.44949900 | -0.77900500 | 2.29996600  |
| O | -2.01316000 | -0.84583300 | 3.30248000  |
| C | 0.63937400  | 0.50014000  | 1.31475700  |
| C | 0.49502200  | -2.06945600 | 1.07575200  |
| O | 1.41822800  | 1.24124900  | 1.73912600  |
| O | 1.17817200  | -2.96161400 | 1.34686600  |
| N | -1.96111800 | 0.78033100  | 0.08686400  |
| C | -3.05858500 | 0.22664300  | -0.46879300 |
| C | -2.17271900 | 2.14702600  | 0.06717600  |
| C | -1.40572200 | 3.23898100  | 0.49528000  |
| H | -0.43165800 | 3.10211300  | 0.95003400  |
| C | -1.94232700 | 4.52264800  | 0.31571800  |
| H | -1.36448900 | 5.38311400  | 0.64070900  |
| C | -3.20061700 | 4.72590900  | -0.27101800 |
| H | -3.58181100 | 5.73488200  | -0.39308700 |
| C | -3.98006100 | 3.63681100  | -0.70624300 |
| H | -4.95493900 | 3.77286200  | -1.16238300 |
| C | -3.43369300 | 2.38156200  | -0.52057000 |
| O | -3.99301800 | 1.16245000  | -0.85868900 |
| C | 0.09366500  | -0.54228900 | -1.17363400 |
| O | 2.35674600  | -0.71235700 | -1.01254500 |
| O | -0.00850500 | -0.43068000 | -2.31545300 |
| H | 2.59741700  | -0.65829600 | -1.94809500 |
| C | 6.21083300  | 0.46794800  | -0.48578300 |
| C | 5.00567900  | 0.38894200  | 0.44742800  |
| F | 5.88011000  | 0.29064100  | -1.79329000 |
| F | 6.82608000  | 1.68343900  | -0.40191800 |
| F | 7.16030200  | -0.46438800 | -0.20233000 |
| O | 4.37212100  | -0.84391200 | 0.38148000  |
| H | 3.48443100  | -0.78048700 | -0.25980200 |
| H | 5.39424300  | 0.59363000  | 1.45599500  |
| H | 4.34806000  | 1.22582000  | 0.16527100  |

9

|    |            |             |             |
|----|------------|-------------|-------------|
| Mn | 0.87229800 | -1.06824400 | 0.00001400  |
| N  | 1.70208900 | 0.87418400  | -0.00008500 |
| C  | 3.00049500 | 1.23201600  | -0.00014600 |

|   |             |             |            |
|---|-------------|-------------|------------|
| C | 3.43479700  | 2.54967300  | -0.0002110 |
| C | 2.46207300  | 3.58856200  | -0.0002130 |
| C | 1.12631200  | 3.26151700  | -0.0001470 |
| C | 0.74199100  | 1.88965100  | -0.0000800 |
| H | 3.72240000  | 0.42198900  | -0.0001450 |
| H | 4.49684400  | 2.76531900  | -0.0002600 |
| H | 2.77131200  | 4.62929200  | -0.0002630 |
| H | 0.35455900  | 4.02409100  | -0.0001430 |
| C | 0.84340900  | -0.96511100 | -1.8775850 |
| O | 0.81403500  | -0.86398200 | -3.0178590 |
| C | 0.00507500  | -2.67006500 | 0.0001090  |
| C | 2.49193300  | -1.89916000 | -0.0000590 |
| O | -0.52755100 | -3.69280900 | 0.0001590  |
| O | 3.51377800  | -2.43393200 | -0.0001090 |
| N | -0.85660900 | 0.08643900  | 0.0000860  |
| C | -0.56851800 | 1.40564500  | 0.0000000  |
| C | -2.23821100 | -0.00433400 | 0.0000950  |
| C | -3.12674700 | -1.08705700 | 0.0001720  |
| H | -2.77288900 | -2.11128700 | 0.0002260  |
| C | -4.50022000 | -0.80213600 | 0.0001770  |
| H | -5.20688900 | -1.62689800 | 0.0002330  |
| C | -4.98501900 | 0.51446700  | 0.0001120  |
| H | -6.05533900 | 0.69452400  | 0.0001190  |
| C | -4.10177300 | 1.61038000  | 0.0000390  |
| H | -4.45622300 | 2.63560100  | -0.0000090 |
| C | -2.75382800 | 1.30820100  | 0.0000320  |
| O | -1.69366300 | 2.19769000  | -0.0000270 |
| C | 0.84363400  | -0.96499000 | 1.8776180  |
| O | 0.81440100  | -0.86377500 | 3.0178870  |

## 10

|    |             |             |             |
|----|-------------|-------------|-------------|
| Mn | -0.41830900 | -0.64103200 | 0.62784500  |
| N  | -2.02939000 | -1.89596500 | 0.03793400  |
| C  | -2.06059400 | -3.23688600 | 0.01499100  |
| C  | -3.16911100 | -3.95811300 | -0.43236100 |
| C  | -4.29804200 | -3.26775700 | -0.87512800 |
| C  | -4.28391700 | -1.87405800 | -0.85242100 |
| C  | -3.13407400 | -1.23278800 | -0.39102600 |
| H  | -1.17307000 | -3.75092800 | 0.36389400  |
| H  | -3.13524000 | -5.04162600 | -0.42886900 |
| H  | -5.17333400 | -3.80239100 | -1.22817600 |
| H  | -5.13592400 | -1.28964600 | -1.18006100 |
| C  | -0.93510300 | -0.72479800 | 2.38314300  |
| O  | -1.22851200 | -0.78043500 | 3.49980200  |

|   |             |             |             |
|---|-------------|-------------|-------------|
| C | 0.86409300  | 0.56786800  | 0.97997900  |
| C | 0.74683000  | -1.99850100 | 0.82129900  |
| O | 1.69619200  | 1.34444000  | 1.20139400  |
| O | 1.49632400  | -2.87457500 | 0.93880200  |
| N | -1.89971100 | 0.75713500  | 0.18181400  |
| C | -2.98469500 | 0.20322200  | -0.29368500 |
| C | -2.13606300 | 2.13249900  | 0.13390300  |
| C | -1.36435100 | 3.24127300  | 0.49844300  |
| H | -0.36878000 | 3.13160000  | 0.91079900  |
| C | -1.93633600 | 4.49965400  | 0.30676700  |
| H | -1.36909200 | 5.38448700  | 0.57730800  |
| C | -3.23156400 | 4.65564000  | -0.22924000 |
| H | -3.63435600 | 5.65480900  | -0.36004900 |
| C | -4.01136800 | 3.55472500  | -0.59670400 |
| H | -5.00818200 | 3.65960800  | -1.00937500 |
| C | -3.42166800 | 2.31612700  | -0.39726400 |
| O | -3.95328200 | 1.06889900  | -0.66452500 |
| C | 0.05071600  | -0.54248500 | -1.38673900 |
| O | 1.40672900  | -0.58168800 | -1.74040600 |
| O | -0.73352100 | -0.45295800 | -2.32279600 |
| H | 1.45410400  | -0.53042900 | -2.71552900 |
| C | 6.03985500  | 0.43718500  | -0.27377400 |
| C | 4.58941900  | 0.55951200  | -0.70130300 |
| F | 6.76719500  | -0.34898000 | -1.10649200 |
| F | 6.63307000  | 1.65927400  | -0.26092300 |
| F | 6.17545800  | -0.08375800 | 0.97138700  |
| O | 4.01650200  | -0.72867900 | -0.68196000 |
| H | 3.09146000  | -0.66780200 | -0.99319200 |
| H | 4.10033400  | 1.24737600  | -0.00062900 |
| H | 4.58438300  | 1.00977600  | -1.70202900 |

#### TS10\_11

|    |             |            |             |
|----|-------------|------------|-------------|
| Mn | 0.61632600  | 0.20498100 | 0.98800400  |
| N  | 1.19657600  | 2.01543300 | 0.02048700  |
| C  | 0.58571900  | 3.20760700 | 0.09002000  |
| C  | 1.06162900  | 4.33558900 | -0.58221300 |
| C  | 2.21416100  | 4.23100400 | -1.35953300 |
| C  | 2.85985000  | 2.99717000 | -1.44342900 |
| C  | 2.31920200  | 1.92154400 | -0.74131500 |
| H  | -0.30782700 | 3.26547000 | 0.69927700  |
| H  | 0.52653400  | 5.27350800 | -0.48868200 |
| H  | 2.60493200  | 5.09130400 | -1.89191900 |
| H  | 3.75773100  | 2.86241200 | -2.03516600 |
| C  | 1.67071200  | 0.64667100 | 2.44801100  |

|   |             |             |             |
|---|-------------|-------------|-------------|
| O | 2.32272900  | 0.91840500  | 3.35345300  |
| C | 0.22530200  | -1.43030100 | 1.69925300  |
| C | -0.86628000 | 0.91229300  | 1.78691400  |
| O | -0.00708400 | -2.45716000 | 2.16506400  |
| O | -1.78307200 | 1.36875000  | 2.31206500  |
| N | 2.32879100  | -0.39262000 | -0.05768200 |
| C | 2.87796500  | 0.58497100  | -0.73544000 |
| C | 3.13586300  | -1.50824300 | -0.29480000 |
| C | 3.07501300  | -2.83531600 | 0.14372500  |
| H | 2.28847400  | -3.18430400 | 0.80133600  |
| C | 4.07825000  | -3.69324100 | -0.30690100 |
| H | 4.06726700  | -4.73088900 | 0.01049000  |
| C | 5.10828500  | -3.25158300 | -1.16381100 |
| H | 5.86679400  | -3.95694100 | -1.48721100 |
| C | 5.17812700  | -1.92815600 | -1.60793100 |
| H | 5.96342100  | -1.57498400 | -2.26610300 |
| C | 4.17073800  | -1.09523300 | -1.14700500 |
| O | 3.98829200  | 0.24846100  | -1.41799700 |
| C | -0.38092600 | -0.22146100 | -0.64905000 |
| O | -2.39671400 | -1.07726300 | 0.25180400  |
| O | -0.60650900 | -0.32931800 | -1.76923300 |
| H | -2.45455800 | -1.93835100 | -0.18519900 |
| C | -6.34385100 | -0.64319300 | -0.70864200 |
| C | -5.34568900 | 0.18983500  | 0.09208300  |
| F | -5.88293400 | -1.89141000 | -0.99426200 |
| F | -7.51635600 | -0.80970100 | -0.02840400 |
| F | -6.66955300 | -0.07566300 | -1.90190800 |
| O | -4.15463700 | 0.37885100  | -0.58800100 |
| H | -3.34971100 | -0.32883200 | -0.20789600 |
| H | -5.85828800 | 1.14134000  | 0.30402200  |
| H | -5.21936400 | -0.33852000 | 1.05164400  |

## 11

|    |            |             |             |
|----|------------|-------------|-------------|
| Mn | 0.88965300 | -1.04060600 | 0.00000700  |
| N  | 1.66917600 | 0.94012400  | -0.00009500 |
| C  | 2.95918300 | 1.30914600  | -0.00014700 |
| C  | 3.35495100 | 2.64839000  | -0.00020900 |
| C  | 2.38332300 | 3.64774500  | -0.00021800 |
| C  | 1.03776600 | 3.27918400  | -0.00016400 |
| C  | 0.72669600 | 1.92110900  | -0.00010400 |
| H  | 3.69818600 | 0.51759000  | -0.00013900 |
| H  | 4.41197800 | 2.88790000  | -0.00024900 |
| H  | 2.66426000 | 4.69524700  | -0.00026500 |
| H  | 0.24388000 | 4.01692000  | -0.00016800 |

|   |             |             |             |
|---|-------------|-------------|-------------|
| C | 0.87415600  | -1.00066000 | -1.89010000 |
| O | 0.86309800  | -0.97678100 | -3.03226700 |
| C | 0.05537300  | -2.67243400 | 0.00010100  |
| C | 2.53397900  | -1.84890800 | -0.00001400 |
| O | -0.45505100 | -3.70172500 | 0.00016000  |
| O | 3.56081600  | -2.36449500 | -0.00002600 |
| N | -0.85999700 | 0.10218000  | 0.00002100  |
| C | -0.62118700 | 1.39134600  | -0.00004000 |
| C | -2.25284800 | -0.01975200 | 0.00007700  |
| C | -3.11336400 | -1.12288600 | 0.00015500  |
| H | -2.74232600 | -2.14027800 | 0.00018400  |
| C | -4.48158600 | -0.85268900 | 0.00019500  |
| H | -5.18238300 | -1.68110100 | 0.00025600  |
| C | -4.98229700 | 0.46629600  | 0.00016000  |
| H | -6.05561000 | 0.62504800  | 0.00019400  |
| C | -4.13184300 | 1.57503200  | 0.00008200  |
| H | -4.50136000 | 2.59382000  | 0.00005400  |
| C | -2.77752700 | 1.28120900  | 0.00004300  |
| O | -1.71672200 | 2.16881100  | -0.00003200 |
| C | 0.87427900  | -1.00050900 | 1.89011300  |
| O | 0.86329600  | -0.97653900 | 3.03227800  |

**[Mn(qinox)(CO)<sub>3</sub>Br]**

**Cat3**

|    |             |             |             |
|----|-------------|-------------|-------------|
| Mn | 0.90785700  | -0.79967600 | 0.42351800  |
| N  | 1.63140300  | 1.10776100  | 0.53136200  |
| C  | 0.78441200  | 2.03705800  | 0.27393900  |
| C  | 0.26776800  | -2.46205200 | 0.06339900  |
| O  | -0.04658100 | -3.54482000 | -0.19454400 |
| C  | 0.67647900  | -0.94495300 | 2.20058000  |
| C  | 2.56757300  | -1.50369100 | 0.49498100  |
| O  | 0.52866300  | -1.03658300 | 3.34449500  |
| O  | 3.63702200  | -1.93959700 | 0.53486000  |
| O  | 1.23400400  | 3.29358900  | 0.18193700  |
| C  | 2.67112100  | 3.23538300  | 0.49633700  |
| C  | 2.96591900  | 1.72108600  | 0.62460800  |
| H  | 2.81838900  | 3.78714800  | 1.42599200  |
| H  | 3.20211700  | 3.72325800  | -0.32046900 |
| H  | 3.59483800  | 1.34351300  | -0.18734900 |
| H  | 3.43629200  | 1.46307200  | 1.57658100  |
| C  | -0.63366400 | 1.72740900  | 0.09326800  |
| C  | -2.25300600 | 0.06793000  | 0.17929700  |
| C  | -3.27233400 | 1.03364100  | -0.13645300 |

|    |             |             |             |
|----|-------------|-------------|-------------|
| C  | -2.89333900 | 2.38212400  | -0.33283400 |
| C  | -1.57260400 | 2.73840500  | -0.19549000 |
| H  | -1.91234800 | -1.99385700 | 0.73951800  |
| C  | -2.65519100 | -1.26700100 | 0.44872500  |
| C  | -4.63024000 | 0.62086500  | -0.21582500 |
| H  | -3.64981700 | 3.12346800  | -0.57137300 |
| H  | -1.23606800 | 3.76175600  | -0.30846800 |
| C  | -4.98151900 | -0.68727600 | 0.02999200  |
| C  | -3.98259200 | -1.63141900 | 0.37787100  |
| H  | -5.38333200 | 1.36285700  | -0.46401300 |
| H  | -6.02015000 | -0.99677000 | -0.02801200 |
| H  | -4.26660300 | -2.65617700 | 0.59634400  |
| N  | -0.92908100 | 0.42990100  | 0.24622500  |
| Br | 1.16075500  | -0.57930800 | -2.16680400 |

**I**

|    |             |             |             |
|----|-------------|-------------|-------------|
| Mn | 1.06255400  | -0.92815600 | -0.04238600 |
| N  | 1.97710100  | 0.84521000  | 0.01267800  |
| C  | 1.18977400  | 1.88234400  | -0.01223300 |
| C  | 0.38167600  | -2.04569700 | -1.27261800 |
| O  | -0.01632900 | -2.77985800 | -2.08886400 |
| C  | 0.59188200  | -1.83742500 | 1.42654300  |
| C  | 2.62147700  | -1.80538700 | -0.13307400 |
| O  | 0.30698500  | -2.43969600 | 2.38552700  |
| O  | 3.63588200  | -2.37642500 | -0.18582800 |
| O  | 1.75645300  | 3.09826300  | -0.00326900 |
| C  | 3.20869400  | 2.88031000  | -0.02540100 |
| C  | 3.36520400  | 1.34402700  | 0.07627800  |
| H  | 3.63243500  | 3.42437900  | 0.81890500  |
| H  | 3.58294800  | 3.29385700  | -0.96342500 |
| H  | 3.95351200  | 0.93082700  | -0.74606300 |
| H  | 3.82353900  | 1.03161900  | 1.01878100  |
| C  | -0.24116600 | 1.69807700  | -0.03554600 |
| C  | -1.96049300 | 0.11935600  | 0.00085100  |
| C  | -2.93612200 | 1.17328700  | -0.03605000 |
| C  | -2.48976800 | 2.52239700  | -0.07488900 |
| C  | -1.14402300 | 2.78543500  | -0.06495600 |
| H  | -1.70200800 | -2.02239200 | 0.11943700  |
| C  | -2.42394800 | -1.21953300 | 0.07016700  |
| C  | -4.31802300 | 0.84954000  | -0.02459000 |
| H  | -3.21819400 | 3.32688200  | -0.10438300 |
| H  | -0.75397100 | 3.79636800  | -0.08204900 |
| C  | -4.73637400 | -0.46369400 | 0.03196900  |
| C  | -3.77612700 | -1.50144400 | 0.08494400  |



|   |             |             |             |
|---|-------------|-------------|-------------|
| H | -5.03974100 | 1.66091500  | -0.05741500 |
| H | -5.79516200 | -0.70276300 | 0.04141000  |
| H | -4.10433400 | -2.53501500 | 0.14040100  |
| N | -0.60606900 | 0.39641500  | -0.02051100 |

**2**

|    |             |             |             |
|----|-------------|-------------|-------------|
| Mn | 1.03066600  | -0.92752600 | -0.00135900 |
| N  | 1.96147900  | 0.78226700  | 0.02640200  |
| C  | 1.19801200  | 1.87586400  | 0.04432200  |
| C  | 0.43288800  | -1.90405000 | -1.35051700 |
| O  | 0.06625200  | -2.57534400 | -2.24498700 |
| C  | 0.45577500  | -1.91280300 | 1.34869900  |
| C  | 2.59071300  | -1.78841100 | -0.01965300 |
| O  | 0.10013500  | -2.59126500 | 2.24230800  |
| O  | 3.62298200  | -2.34580100 | -0.03175600 |
| O  | 1.87306200  | 3.07524500  | 0.09283700  |
| C  | 3.25488500  | 2.74378200  | -0.21223900 |
| C  | 3.36012200  | 1.24535500  | 0.12099500  |
| H  | 3.89876800  | 3.38464800  | 0.39151700  |
| H  | 3.42941100  | 2.93993000  | -1.27661600 |
| H  | 4.00651200  | 0.70952700  | -0.57739200 |
| H  | 3.73898200  | 1.07903400  | 1.13696300  |
| C  | -0.18476100 | 1.72360400  | 0.02670200  |
| C  | -1.93989600 | 0.12997700  | 0.00246100  |
| C  | -2.90866600 | 1.19058200  | -0.00369600 |
| C  | -2.45059600 | 2.55701300  | 0.00182000  |
| C  | -1.11177200 | 2.80702600  | 0.01863400  |
| H  | -1.72220300 | -2.01265300 | 0.00919400  |
| C  | -2.43237700 | -1.19718300 | 0.00148000  |
| C  | -4.28602700 | 0.88240200  | -0.01330000 |
| H  | -3.17905100 | 3.36286200  | -0.00646500 |
| H  | -0.72062400 | 3.81986500  | 0.02502000  |
| C  | -4.73930600 | -0.43154500 | -0.01622700 |
| C  | -3.79531200 | -1.47284100 | -0.00794200 |
| H  | -4.99654500 | 1.70619500  | -0.01825800 |
| H  | -5.80339700 | -0.64883300 | -0.02370500 |
| H  | -4.12741200 | -2.50778200 | -0.00816300 |
| N  | -0.56899900 | 0.38345100  | 0.01151600  |

**3**

|    |            |             |            |
|----|------------|-------------|------------|
| Mn | 0.85501700 | -0.79467900 | 0.46381200 |
| N  | 1.64981300 | 1.07120000  | 0.59194800 |
| C  | 0.80614300 | 2.02914900  | 0.30583600 |
| C  | 0.17187800 | -2.41718300 | 0.04439900 |

|    |             |             |             |
|----|-------------|-------------|-------------|
| O  | -0.16901800 | -3.48794400 | -0.24616400 |
| C  | 0.55316400  | -0.95044900 | 2.20823700  |
| C  | 2.48822300  | -1.54273400 | 0.57056700  |
| O  | 0.34629100  | -1.03074500 | 3.34834600  |
| O  | 3.54722800  | -2.00962800 | 0.64543900  |
| O  | 1.32383100  | 3.28865100  | 0.27423200  |
| C  | 2.76910800  | 3.13509200  | 0.41566500  |
| C  | 2.95486700  | 1.67217600  | 0.87573100  |
| H  | 3.11470800  | 3.87668800  | 1.13678700  |
| H  | 3.22213600  | 3.32865400  | -0.56109300 |
| H  | 3.75436000  | 1.16998700  | 0.32299400  |
| H  | 3.18728700  | 1.59963600  | 1.94647600  |
| C  | -0.56434900 | 1.75611200  | 0.06882800  |
| C  | -2.24263900 | 0.09707000  | 0.17143200  |
| C  | -3.23970100 | 1.07077100  | -0.20261000 |
| C  | -2.82056300 | 2.42482200  | -0.45090500 |
| C  | -1.50130200 | 2.75613200  | -0.28122200 |
| H  | -1.98733400 | -1.93727200 | 0.84762300  |
| C  | -2.70041100 | -1.20392800 | 0.49899500  |
| C  | -4.59307800 | 0.68717600  | -0.28757800 |
| H  | -3.55840100 | 3.16927500  | -0.73537100 |
| H  | -1.14996400 | 3.77435300  | -0.41552500 |
| C  | -5.00555600 | -0.61152800 | 0.00479200  |
| C  | -4.04617400 | -1.55104400 | 0.41344800  |
| H  | -5.32268000 | 1.43885500  | -0.58080800 |
| H  | -6.05384900 | -0.88620800 | -0.06600900 |
| H  | -4.35030700 | -2.56117800 | 0.67510600  |
| N  | -0.90286300 | 0.41882700  | 0.22848000  |
| Br | 1.25644700  | -0.62081400 | -2.23477100 |

**Idimer**

|    |             |             |             |
|----|-------------|-------------|-------------|
| Mn | -0.97955600 | -0.28930100 | -1.29885900 |
| N  | -1.83611200 | -2.05299600 | -0.82735700 |
| C  | -2.94146400 | -1.99404200 | -0.15725600 |
| C  | -0.07532500 | 1.25990900  | -1.46055500 |
| O  | 0.54856100  | 2.21861200  | -1.69121200 |
| C  | -1.68379000 | -0.14770700 | -2.91222900 |
| C  | 0.49394500  | -1.11323200 | -1.88928900 |
| O  | -2.09869700 | -0.04601900 | -3.99739000 |
| O  | 1.42229100  | -1.65690300 | -2.33930400 |
| O  | -3.57657400 | -3.15481500 | 0.10779200  |
| C  | -2.68983100 | -4.21470900 | -0.38029700 |
| C  | -1.62348400 | -3.46086800 | -1.20531200 |
| H  | -3.29410300 | -4.90928600 | -0.96340100 |

|    |             |             |             |
|----|-------------|-------------|-------------|
| H  | -2.27476300 | -4.72281900 | 0.49338000  |
| H  | -0.60751000 | -3.78229200 | -0.97051000 |
| H  | -1.77182200 | -3.56995100 | -2.28503000 |
| C  | -3.48674100 | -0.71348200 | 0.21259100  |
| C  | -3.31955500 | 1.59381100  | -0.06710500 |
| C  | -4.50531700 | 1.78171600  | 0.72318600  |
| C  | -5.16309500 | 0.64190400  | 1.26112000  |
| C  | -4.67099100 | -0.60438300 | 0.97770900  |
| H  | -1.88290000 | 2.61672700  | -1.31135800 |
| C  | -2.74360100 | 2.73773900  | -0.67353300 |
| C  | -5.01916600 | 3.08970700  | 0.92057100  |
| H  | -6.05745900 | 0.77110600  | 1.86304300  |
| H  | -5.15395600 | -1.50870500 | 1.32917700  |
| C  | -4.41837200 | 4.18430000  | 0.33331000  |
| C  | -3.27985900 | 3.99681000  | -0.48294800 |
| H  | -5.90933500 | 3.20759200  | 1.53228500  |
| H  | -4.82358300 | 5.18026200  | 0.48293600  |
| H  | -2.81905200 | 4.85102300  | -0.97005700 |
| N  | -2.77332900 | 0.33474300  | -0.26553500 |
| Mn | 0.97969600  | -0.28960500 | 1.29918000  |
| N  | 1.83674200  | -2.05306300 | 0.82758600  |
| C  | 2.94195100  | -1.99379300 | 0.15726400  |
| C  | 0.07523400  | 1.25957800  | 1.45989300  |
| O  | -0.54869700 | 2.21839200  | 1.68995900  |
| C  | 1.68373200  | -0.14733700 | 2.91259600  |
| C  | -0.49357500 | -1.11369000 | 1.88991300  |
| O  | 2.09849200  | -0.04492500 | 3.99773900  |
| O  | -1.42192600 | -1.65741800 | 2.33985500  |
| O  | 3.57725900  | -3.15444700 | -0.10801800 |
| C  | 2.69023800  | -4.21450800 | 0.37921400  |
| C  | 1.62471800  | -3.46105900 | 1.20554300  |
| H  | 3.29440300  | -4.91015100 | 0.96114100  |
| H  | 2.27445200  | -4.72125200 | -0.49491900 |
| H  | 0.60853600  | -3.78263800 | 0.97187700  |
| H  | 1.77436700  | -3.57024100 | 2.28508100  |
| C  | 3.48691600  | -0.71311300 | -0.21259600 |
| C  | 3.31935500  | 1.59408800  | 0.06744700  |
| C  | 4.50461800  | 1.78238500  | -0.72350700 |
| C  | 5.16243100  | 0.64277500  | -1.26179600 |
| C  | 4.67081900  | -0.60366800 | -0.97818800 |
| H  | 1.88332200  | 2.61642400  | 1.31289700  |
| C  | 2.74347300  | 2.73780200  | 0.67439000  |
| C  | 5.01794900  | 3.09055500  | -0.92111600 |
| H  | 6.05647400  | 0.77221000  | -1.86414900 |

|   |            |             |             |
|---|------------|-------------|-------------|
| H | 5.15389100 | -1.50782700 | -1.32992800 |
| C | 4.41718100 | 4.18491600  | -0.33341700 |
| C | 3.27925400 | 3.99702800  | 0.48358900  |
| H | 5.90772600 | 3.20876300  | -1.53334000 |
| H | 4.82198900 | 5.18101500  | -0.48322100 |
| H | 2.81857000 | 4.85107500  | 0.97110300  |
| N | 2.77350800 | 0.33491800  | 0.26594000  |

**TS2\_4**

|    |             |             |             |
|----|-------------|-------------|-------------|
| Mn | -0.84938300 | -0.88483300 | -0.36023300 |
| N  | -1.70791400 | 0.88644900  | -0.50295100 |
| C  | -0.91409000 | 1.92271600  | -0.34821700 |
| C  | -0.24113900 | -2.16592000 | 0.71778100  |
| O  | 0.10695900  | -3.04320500 | 1.41830600  |
| C  | -0.36745500 | -1.57017400 | -1.91243200 |
| C  | -2.43734700 | -1.69026900 | -0.40580800 |
| O  | -0.05908200 | -2.07903400 | -2.92558600 |
| O  | -3.48428700 | -2.21157700 | -0.43999300 |
| O  | -1.50762700 | 3.15543400  | -0.36467800 |
| C  | -2.86474500 | 2.92286600  | -0.84226600 |
| C  | -3.07993900 | 1.40781600  | -0.65083600 |
| H  | -2.90656100 | 3.21807500  | -1.89582600 |
| H  | -3.53985700 | 3.54751500  | -0.25655100 |
| H  | -3.66143500 | 1.18187200  | 0.24974100  |
| H  | -3.58317500 | 0.94997600  | -1.50563400 |
| C  | 0.46548600  | 1.70524400  | -0.15672700 |
| C  | 2.15670600  | 0.07135600  | -0.08288700 |
| C  | 3.14369500  | 1.09142600  | 0.13189900  |
| C  | 2.72401600  | 2.46083800  | 0.19973700  |
| C  | 1.40278300  | 2.75834700  | 0.03121500  |
| H  | 1.89071100  | -2.03841400 | -0.43265800 |
| C  | 2.61295000  | -1.26234100 | -0.22178700 |
| C  | 4.50739600  | 0.73421700  | 0.24981600  |
| H  | 3.46422100  | 3.23912500  | 0.36095900  |
| H  | 1.03935800  | 3.78057000  | 0.04412400  |
| C  | 4.91950000  | -0.58423400 | 0.13872700  |
| C  | 3.95784400  | -1.58323400 | -0.11095000 |
| H  | 5.23374600  | 1.52484600  | 0.42194800  |
| H  | 5.97026300  | -0.84292900 | 0.22899500  |
| H  | 4.26898400  | -2.61796000 | -0.22542800 |
| N  | 0.80132300  | 0.37186100  | -0.17090900 |
| C  | -1.62095000 | -0.17638500 | 2.28889100  |
| O  | -0.92503200 | 0.76883400  | 2.52194100  |
| O  | -2.47890700 | -0.95090700 | 2.61204000  |

**4**

|    |             |             |             |
|----|-------------|-------------|-------------|
| Mn | 0.92922800  | -0.87788300 | 0.23457300  |
| N  | 1.73879800  | 0.96016600  | 0.49617400  |
| C  | 0.93119700  | 1.93300500  | 0.24769000  |
| C  | 0.20758700  | -2.35117300 | -0.47501900 |
| O  | -0.19561700 | -3.32940000 | -0.96842200 |
| C  | 0.68561500  | -1.33389100 | 1.95323200  |
| C  | 2.54018300  | -1.63411200 | 0.15368100  |
| O  | 0.55260300  | -1.70273300 | 3.05343800  |
| O  | 3.60092300  | -2.11466700 | 0.10222900  |
| O  | 1.44553700  | 3.18077800  | 0.19351300  |
| C  | 2.85168800  | 3.04603400  | 0.58439300  |
| C  | 3.09533200  | 1.51923800  | 0.59352300  |
| H  | 2.96119500  | 3.50127600  | 1.57173300  |
| H  | 3.45254800  | 3.58868500  | -0.14537400 |
| H  | 3.68706600  | 1.18496600  | -0.26522500 |
| H  | 3.59110700  | 1.17917300  | 1.50612100  |
| C  | -0.48142100 | 1.68046500  | 0.06488700  |
| C  | -2.15736700 | 0.06815800  | 0.13079000  |
| C  | -3.15137100 | 1.07240000  | -0.12521900 |
| C  | -2.73416800 | 2.42190400  | -0.28403000 |
| C  | -1.40489500 | 2.73001100  | -0.15746300 |
| H  | -1.86713900 | -2.01234800 | 0.63160700  |
| C  | -2.59770500 | -1.25804500 | 0.37789100  |
| C  | -4.52133200 | 0.70451500  | -0.18569800 |
| H  | -3.47427000 | 3.19261700  | -0.47787400 |
| H  | -1.03945200 | 3.74746700  | -0.23292700 |
| C  | -4.91376100 | -0.60037200 | 0.02891300  |
| C  | -3.93941600 | -1.58206900 | 0.32847800  |
| H  | -5.25598400 | 1.47778500  | -0.39303800 |
| H  | -5.96372500 | -0.87278000 | -0.01503900 |
| H  | -4.24930400 | -2.60349700 | 0.52863400  |
| N  | -0.81273400 | 0.38033900  | 0.16572500  |
| C  | 1.24708400  | -0.39899600 | -1.95462000 |
| O  | 0.87167300  | 0.74702300  | -2.30201000 |
| O  | 1.78754400  | -1.27127900 | -2.69059900 |

**5**

|    |             |             |             |
|----|-------------|-------------|-------------|
| Mn | -0.70892300 | 0.63002800  | 1.17896100  |
| N  | -0.87565900 | 2.22748300  | -0.07208400 |
| C  | -1.49976500 | 1.96947300  | -1.16660200 |
| C  | -0.33268000 | -0.93011500 | 1.97045500  |
| O  | -0.01566500 | -1.92032800 | 2.49728000  |

|   |             |             |             |
|---|-------------|-------------|-------------|
| C | -1.94295500 | 1.15699400  | 2.38529900  |
| C | 0.63815500  | 1.39115100  | 2.06384500  |
| O | -2.69662900 | 1.48054700  | 3.21330900  |
| O | 1.51992400  | 1.90068300  | 2.62846800  |
| O | -1.46616600 | 2.89483800  | -2.14588500 |
| C | -0.76257800 | 4.04929200  | -1.57582500 |
| C | -0.19258300 | 3.51844900  | -0.24023800 |
| H | -1.49939600 | 4.84455300  | -1.44104800 |
| H | -0.00285700 | 4.36083600  | -2.29240100 |
| H | 0.88907600  | 3.35203400  | -0.28376000 |
| H | -0.40507400 | 4.18259100  | 0.60115600  |
| C | -2.24619600 | 0.73248600  | -1.31508900 |
| C | -2.97433400 | -1.19715200 | -0.24416400 |
| C | -3.72813800 | -1.57422000 | -1.40705200 |
| C | -3.70154200 | -0.72184800 | -2.54206800 |
| C | -2.98697700 | 0.44724500  | -2.48583200 |
| H | -2.56870600 | -1.70520900 | 1.81600000  |
| C | -3.08161700 | -2.00903200 | 0.91511200  |
| C | -4.50090600 | -2.76589100 | -1.38586700 |
| H | -4.26584800 | -0.99246300 | -3.42958300 |
| H | -2.96409300 | 1.14905800  | -3.31105700 |
| C | -4.56099900 | -3.54792600 | -0.25212200 |
| C | -3.85558300 | -3.15195000 | 0.91015300  |
| H | -5.05399500 | -3.04084200 | -2.27961500 |
| H | -5.15755700 | -4.45481700 | -0.24164200 |
| H | -3.92824600 | -3.75135900 | 1.81271100  |
| N | -2.19013300 | -0.06295800 | -0.23567700 |
| C | 0.80334700  | -0.03340600 | -0.26427500 |
| O | 1.90982300  | -0.51515600 | 0.18147900  |
| O | 0.54517400  | 0.09379700  | -1.48497600 |
| H | 2.96743700  | -0.97275100 | -0.85401300 |
| C | 5.88116800  | -0.93486100 | -0.43845700 |
| C | 4.71298300  | -1.89366400 | -0.64456100 |
| F | 5.51550300  | 0.21913000  | 0.17804900  |
| F | 6.85012100  | -1.50319500 | 0.33328900  |
| F | 6.47492600  | -0.57548300 | -1.60718200 |
| O | 3.71810400  | -1.33565100 | -1.45120300 |
| H | 5.13190700  | -2.79327800 | -1.11231100 |
| H | 4.34668800  | -2.16477700 | 0.35442500  |

#### TS5\_6

|    |             |             |             |
|----|-------------|-------------|-------------|
| Mn | -2.08070600 | -1.50522700 | -0.27108500 |
| N  | -1.94608700 | -1.45112400 | 1.76617900  |
| C  | -1.98414200 | -0.26603900 | 2.26066400  |

|   |             |             |             |
|---|-------------|-------------|-------------|
| C | -1.88909800 | -1.37716300 | -2.04867900 |
| O | -1.70769500 | -1.35118100 | -3.19806600 |
| C | -3.79488100 | -2.09166800 | -0.32669100 |
| C | -1.40330600 | -3.15492900 | -0.33527500 |
| O | -4.87891400 | -2.50624600 | -0.39984900 |
| O | -0.95246100 | -4.22678500 | -0.36039300 |
| O | -1.68705800 | -0.11459500 | 3.56386900  |
| C | -1.48040000 | -1.47133100 | 4.08595700  |
| C | -1.48734200 | -2.36471300 | 2.82312400  |
| H | -2.30602600 | -1.68456800 | 4.76818600  |
| H | -0.53530300 | -1.47515000 | 4.62853400  |
| H | -0.49027100 | -2.74026200 | 2.57033300  |
| H | -2.16325300 | -3.21851200 | 2.91535300  |
| C | -2.37889900 | 0.86847200  | 1.43756600  |
| C | -3.17299100 | 1.53416000  | -0.64098000 |
| C | -3.26233300 | 2.89382600  | -0.18560900 |
| C | -2.88071000 | 3.19134400  | 1.14762600  |
| C | -2.46792400 | 2.17437100  | 1.97100100  |
| H | -3.63637300 | 0.20587300  | -2.28179500 |
| C | -3.64098500 | 1.23273200  | -1.94680900 |
| C | -3.75308100 | 3.89698600  | -1.06404600 |
| H | -2.94139500 | 4.21417000  | 1.50727700  |
| H | -2.19866000 | 2.34398200  | 3.00664500  |
| C | -4.17308200 | 3.57492600  | -2.33637500 |
| C | -4.12902000 | 2.22693200  | -2.76977000 |
| H | -3.80069800 | 4.92141800  | -0.70571200 |
| H | -4.55083800 | 4.34532600  | -3.00129200 |
| H | -4.48871200 | 1.97006900  | -3.76158000 |
| N | -2.67533900 | 0.53995400  | 0.17257800  |
| C | -0.06112600 | -0.78322000 | -0.19982300 |
| O | 0.80869600  | -1.29569200 | -1.04297600 |
| O | 0.27389200  | 0.09109000  | 0.62307500  |
| H | 1.95013800  | -0.86178000 | -0.97697100 |
| C | 4.81211000  | -2.16265300 | -0.61130100 |
| C | 3.89937000  | -1.48279300 | -1.62626500 |
| F | 4.12423900  | -2.80273500 | 0.37095100  |
| F | 5.60587700  | -3.09880500 | -1.20595100 |
| F | 5.64605300  | -1.28712500 | 0.01267900  |
| O | 3.09965400  | -0.51686400 | -1.02558300 |
| H | 4.56128000  | -1.05881300 | -2.39662900 |
| H | 3.31095900  | -2.28493000 | -2.09722500 |
| C | 4.11488600  | 3.10739800  | 0.61595800  |
| C | 4.72689500  | 2.36577800  | -0.56789800 |
| F | 3.25915900  | 2.33589000  | 1.33451400  |

|   |            |            |             |
|---|------------|------------|-------------|
| F | 5.08232500 | 3.53095500 | 1.47618100  |
| F | 3.41678000 | 4.20957600 | 0.23743900  |
| O | 3.75297700 | 1.95442400 | -1.48528100 |
| H | 3.48351100 | 1.00210600 | -1.29112600 |
| H | 5.42288700 | 3.06377200 | -1.04687100 |
| H | 5.30412200 | 1.52865300 | -0.15622700 |

**6**

|    |             |             |             |
|----|-------------|-------------|-------------|
| Mn | -0.97359900 | -0.87305100 | -0.21167800 |
| N  | -1.70531700 | 1.04495000  | -0.31857500 |
| C  | -0.85258200 | 1.99355000  | -0.17773400 |
| C  | -0.34898200 | -2.51665700 | 0.16509500  |
| O  | -0.04195100 | -3.59830700 | 0.45696200  |
| C  | -0.73478100 | -1.02354200 | -2.02182500 |
| C  | -2.61785500 | -1.57866900 | -0.30036600 |
| O  | -0.58719200 | -1.14719200 | -3.16287000 |
| O  | -3.68502000 | -2.02636200 | -0.37146500 |
| O  | -1.30775900 | 3.25407000  | -0.14317800 |
| C  | -2.76460000 | 3.16584100  | -0.33049800 |
| C  | -3.04760600 | 1.64399900  | -0.38666300 |
| H  | -3.00227800 | 3.68787700  | -1.25833000 |
| H  | -3.23148000 | 3.67065700  | 0.51528200  |
| H  | -3.64307700 | 1.29126500  | 0.45988500  |
| H  | -3.54543100 | 1.34258800  | -1.31203200 |
| C  | 0.57426900  | 1.70118000  | -0.05965800 |
| C  | 2.19811400  | 0.04595300  | -0.07959300 |
| C  | 3.22676300  | 1.03858800  | 0.08599700  |
| C  | 2.84990200  | 2.39910400  | 0.17972700  |
| C  | 1.52096400  | 2.73673600  | 0.09137500  |
| H  | 1.83932700  | -2.06387000 | -0.38289900 |
| C  | 2.59417700  | -1.31018100 | -0.22193200 |
| C  | 4.58936100  | 0.63723600  | 0.13657100  |
| H  | 3.61329700  | 3.16061200  | 0.30710800  |
| H  | 1.18240200  | 3.76464000  | 0.13774300  |
| C  | 4.93565000  | -0.68934300 | 0.01036200  |
| C  | 3.92545400  | -1.66556000 | -0.17975400 |
| H  | 5.34962400  | 1.40135500  | 0.26944800  |
| H  | 5.97783300  | -0.99033800 | 0.04685900  |
| H  | 4.20314300  | -2.70859000 | -0.29656200 |
| N  | 0.86957600  | 0.39583100  | -0.11976800 |
| C  | -1.11519600 | -0.61779700 | 1.83632200  |
| O  | -2.40252300 | -0.46785900 | 2.32473400  |
| O  | -0.20316100 | -0.54632900 | 2.65834000  |
| H  | -2.33065300 | -0.32218000 | 3.28911600  |



7

|    |             |             |             |
|----|-------------|-------------|-------------|
| Mn | -0.94559000 | -0.91414100 | -0.19889800 |
| N  | -1.80015200 | 0.95744000  | -0.42437700 |
| C  | -0.97671700 | 1.94405300  | -0.19274600 |
| C  | -0.21390700 | -2.51224500 | 0.15567600  |
| O  | 0.15908600  | -3.59094900 | 0.38938100  |
| C  | -0.72829800 | -1.07923800 | -1.99909200 |
| C  | -2.55247500 | -1.68561600 | -0.18493100 |
| O  | -0.58634500 | -1.19008200 | -3.14553000 |
| O  | -3.61252400 | -2.16722800 | -0.15939500 |
| O  | -1.54533000 | 3.18158300  | -0.08612400 |
| C  | -2.94484400 | 3.00739100  | -0.46060600 |
| C  | -3.16453400 | 1.48271900  | -0.38444300 |
| H  | -3.07141100 | 3.39871300  | -1.47528500 |
| H  | -3.55310500 | 3.58499200  | 0.23660400  |
| H  | -3.64988600 | 1.18077100  | 0.55257800  |
| H  | -3.76439900 | 1.11137300  | -1.22109000 |
| C  | 0.41785300  | 1.73492600  | -0.03836900 |
| C  | 2.15419300  | 0.13512300  | -0.13152700 |
| C  | 3.13613300  | 1.17209100  | 0.08795100  |
| C  | 2.67710200  | 2.52587900  | 0.25987900  |
| C  | 1.33475300  | 2.79190300  | 0.16787800  |
| H  | 1.93444800  | -1.96431200 | -0.57972300 |
| C  | 2.64173600  | -1.17650400 | -0.36449800 |
| C  | 4.50538100  | 0.84378900  | 0.11046600  |
| H  | 3.40038300  | 3.31828000  | 0.42966300  |
| H  | 0.95135800  | 3.80413300  | 0.25075700  |
| C  | 4.95047300  | -0.46314700 | -0.09449900 |
| C  | 4.00432800  | -1.46846500 | -0.34266900 |
| H  | 5.22243500  | 1.64306300  | 0.28586100  |
| H  | 6.01158700  | -0.69385200 | -0.07354300 |
| H  | 4.33005400  | -2.48921800 | -0.52637200 |
| N  | 0.80461800  | 0.40242800  | -0.12834400 |
| C  | -1.11446600 | -0.56557300 | 1.84691700  |
| O  | -0.22720800 | -1.26644100 | 2.65998900  |
| O  | -1.88245400 | 0.19578900  | 2.43802600  |
| H  | -0.40504300 | -0.98339600 | 3.57894300  |

8

|    |             |             |            |
|----|-------------|-------------|------------|
| Mn | -0.44772100 | -0.57592700 | 0.81256900 |
| N  | -0.02727900 | 1.44994300  | 0.82776300 |
| C  | -0.92845500 | 2.18957900  | 0.23584400 |
| C  | -0.72099400 | -2.32812100 | 0.55699800 |

|   |             |             |             |
|---|-------------|-------------|-------------|
| O | -0.78488300 | -3.47770500 | 0.37910200  |
| C | -1.28476800 | -0.50292700 | 2.43046900  |
| C | 1.12735500  | -0.96830900 | 1.55254200  |
| O | -1.83157300 | -0.46779200 | 3.45237300  |
| O | 2.14456600  | -1.21856300 | 2.06028400  |
| O | -0.66420900 | 3.52989900  | 0.19920300  |
| C | 0.70189200  | 3.67606500  | 0.69184500  |
| C | 0.98958300  | 2.33697900  | 1.39879400  |
| H | 0.73053000  | 4.54720300  | 1.34719700  |
| H | 1.35441500  | 3.83892100  | -0.17223000 |
| H | 2.00130300  | 1.97618400  | 1.19717400  |
| H | 0.86228400  | 2.40932000  | 2.48869400  |
| C | -2.12247600 | 1.63616800  | -0.29201100 |
| C | -3.47439800 | -0.29661400 | -0.40100100 |
| C | -4.48981000 | 0.43973800  | -1.11804700 |
| C | -4.24558600 | 1.82594900  | -1.42081500 |
| C | -3.08441500 | 2.40953700  | -0.98433500 |
| H | -3.05525500 | -2.20144000 | 0.52195500  |
| C | -3.77340100 | -1.64070100 | -0.05872200 |
| C | -5.68933200 | -0.20036200 | -1.48494700 |
| H | -4.99458600 | 2.39470900  | -1.96439400 |
| H | -2.87909400 | 3.46112700  | -1.15890000 |
| C | -5.93978900 | -1.53356800 | -1.15740000 |
| C | -4.97300300 | -2.24413700 | -0.43026200 |
| H | -6.43269700 | 0.37579100  | -2.03196900 |
| H | -6.87213400 | -2.00750700 | -1.45009300 |
| H | -5.15684700 | -3.27685100 | -0.14483100 |
| N | -2.27553000 | 0.27694900  | -0.04908400 |
| C | 0.31993200  | -0.57715500 | -1.11526700 |
| O | 1.71889500  | -0.39184300 | -1.24436800 |
| O | -0.26276800 | -0.72307600 | -2.18439300 |
| H | 1.91268800  | -0.42467200 | -2.20221100 |
| C | 5.78529000  | -0.46144800 | -0.79827400 |
| C | 4.88062400  | 0.00951600  | 0.33445100  |
| F | 6.43936400  | 0.56183800  | -1.40346500 |
| F | 6.73260500  | -1.31960700 | -0.33503700 |
| F | 5.09947200  | -1.11409600 | -1.77273900 |
| O | 3.91038700  | 0.92107300  | -0.11848300 |
| H | 3.12547200  | 0.43613500  | -0.45154900 |
| H | 4.44175700  | -0.87949100 | 0.80040100  |
| H | 5.51903800  | 0.51021000  | 1.06800300  |

**TS8\_9**

|    |            |            |            |
|----|------------|------------|------------|
| Mn | 0.66063000 | 0.78544300 | 0.80818200 |
|----|------------|------------|------------|

|   |             |             |             |
|---|-------------|-------------|-------------|
| N | -0.02829000 | -1.14568500 | 0.96784000  |
| C | 0.79904900  | -2.05716900 | 0.52358300  |
| C | 1.16877900  | 2.50715500  | 0.60872100  |
| O | 1.38146000  | 3.64534400  | 0.53043400  |
| C | 1.57399200  | 0.60683300  | 2.38525800  |
| C | -0.83222600 | 1.39657100  | 1.63060000  |
| O | 2.18443500  | 0.46623100  | 3.35324200  |
| O | -1.75401500 | 1.76879500  | 2.21797200  |
| O | 0.39209100  | -3.34719400 | 0.67850700  |
| C | -0.99278100 | -3.27786400 | 1.14137000  |
| C | -1.16849900 | -1.81607900 | 1.60172300  |
| H | -1.11669900 | -4.01665400 | 1.93370800  |
| H | -1.63841500 | -3.52893500 | 0.29418100  |
| H | -2.11671000 | -1.38925200 | 1.26147700  |
| H | -1.10842600 | -1.71616900 | 2.69437400  |
| C | 2.04289400  | -1.71421600 | -0.06219700 |
| C | 3.51803000  | 0.04765200  | -0.63206700 |
| C | 4.46334800  | -0.90758000 | -1.15957000 |
| C | 4.13058100  | -2.30688200 | -1.11343000 |
| C | 2.93448500  | -2.68994800 | -0.56833400 |
| H | 3.20697600  | 2.15695700  | -0.30257200 |
| C | 3.88543800  | 1.41430100  | -0.69190200 |
| C | 5.68311000  | -0.45897400 | -1.70269300 |
| H | 4.83146700  | -3.03634400 | -1.50843000 |
| H | 2.64526800  | -3.73439200 | -0.51125800 |
| C | 6.01238200  | 0.89456800  | -1.74714800 |
| C | 5.09950800  | 1.82799400  | -1.23481100 |
| H | 6.37492400  | -1.20244300 | -2.09231000 |
| H | 6.95840400  | 1.21910000  | -2.17012200 |
| H | 5.33419800  | 2.88894900  | -1.25685800 |
| N | 2.31157600  | -0.34862700 | -0.09122300 |
| C | -0.06461200 | 0.77066900  | -1.04970800 |
| O | -2.21528800 | 1.45199900  | -0.92910800 |
| O | 0.02436900  | 0.58873300  | -2.18511600 |
| H | -2.35548000 | 1.60347800  | -1.87466400 |
| C | -6.05123700 | 0.02416400  | -0.92056800 |
| C | -5.00162100 | 0.25380800  | 0.16315700  |
| F | -6.27163500 | -1.29513200 | -1.16953000 |
| F | -7.25654600 | 0.55756700  | -0.56647700 |
| F | -5.71379500 | 0.58626100  | -2.11225000 |
| O | -3.77303000 | -0.29601200 | -0.17495600 |
| H | -3.09073700 | 0.48323300  | -0.52989200 |
| H | -4.95741300 | 1.34301700  | 0.31767900  |
| H | -5.41220400 | -0.19788100 | 1.07842700  |

**9**

|    |             |             |             |
|----|-------------|-------------|-------------|
| Mn | 0.98708100  | -0.94788300 | 0.03180800  |
| N  | 1.87603900  | 0.89548900  | -0.22083800 |
| C  | 1.04053500  | 1.90109200  | -0.08886300 |
| C  | 0.22078000  | -2.57132200 | 0.33417100  |
| O  | -0.15817400 | -3.63936300 | 0.55959700  |
| C  | 1.03425400  | -0.61249300 | 1.87866000  |
| C  | 2.61631900  | -1.74899000 | 0.01641500  |
| O  | 1.03943900  | -0.37422600 | 2.99945700  |
| O  | 3.66225200  | -2.23456700 | -0.00530100 |
| O  | 1.60962800  | 3.13321600  | -0.04905600 |
| C  | 3.02427000  | 2.93620300  | -0.36002100 |
| C  | 3.24389600  | 1.42051300  | -0.17599100 |
| H  | 3.60544000  | 3.55841800  | 0.32059000  |
| H  | 3.18524900  | 3.25981000  | -1.39246300 |
| H  | 3.86365800  | 0.99643300  | -0.97100500 |
| H  | 3.71604200  | 1.18499700  | 0.78741000  |
| C  | -0.35488900 | 1.69475300  | 0.01768300  |
| C  | -2.09567700 | 0.08565700  | -0.06171000 |
| C  | -3.07491300 | 1.13243500  | 0.09546000  |
| C  | -2.62021100 | 2.49215000  | 0.22196200  |
| C  | -1.28014400 | 2.75904500  | 0.15313800  |
| H  | -1.87980100 | -2.02783300 | -0.45465600 |
| C  | -2.58084000 | -1.22805700 | -0.26825100 |
| C  | -4.44626500 | 0.81075800  | 0.09787800  |
| H  | -3.34867200 | 3.28851000  | 0.34104000  |
| H  | -0.89883000 | 3.77361900  | 0.20462900  |
| C  | -4.89057900 | -0.49852100 | -0.07172000 |
| C  | -3.94352000 | -1.51458300 | -0.26849800 |
| H  | -5.16256100 | 1.61863200  | 0.22800200  |
| H  | -5.95234600 | -0.72548800 | -0.06715700 |
| H  | -4.26839000 | -2.53863300 | -0.43109800 |
| N  | -0.74252200 | 0.35900000  | -0.03012400 |
| C  | 0.79299500  | -1.05800500 | -1.83362900 |
| O  | 0.64841800  | -1.06963700 | -2.97018000 |

**10**

|    |             |             |             |
|----|-------------|-------------|-------------|
| Mn | -0.57823100 | -1.22922700 | 0.46003800  |
| N  | 0.38415200  | 0.31331900  | 1.41223600  |
| C  | -0.14674600 | 1.47268100  | 1.26600900  |
| C  | -1.29674200 | -2.46852600 | -0.62867200 |
| O  | -1.66035100 | -3.30047700 | -1.35231700 |
| C  | -1.53916500 | -1.72813300 | 1.93712100  |

|   |             |             |             |
|---|-------------|-------------|-------------|
| C | 0.71844100  | -2.40289600 | 0.85898900  |
| O | -2.15059600 | -2.06908700 | 2.85758100  |
| O | 1.53739100  | -3.17010500 | 1.14802100  |
| O | 0.49602600  | 2.53171100  | 1.77761500  |
| C | 1.73184800  | 2.00709900  | 2.38045600  |
| C | 1.63965900  | 0.47567800  | 2.16514000  |
| H | 1.73226700  | 2.30584500  | 3.42890300  |
| H | 2.56863600  | 2.47060000  | 1.85653600  |
| H | 2.47809200  | 0.08063900  | 1.58565500  |
| H | 1.57643000  | -0.07976400 | 3.10564500  |
| C | -1.43253600 | 1.62559100  | 0.58781600  |
| C | -3.23013700 | 0.52081000  | -0.37584000 |
| C | -3.89036500 | 1.77737000  | -0.61053300 |
| C | -3.24270200 | 2.97016400  | -0.20990600 |
| C | -2.01981400 | 2.89652300  | 0.41213300  |
| H | -3.46333600 | -1.62624800 | -0.50356900 |
| C | -3.92038600 | -0.67228100 | -0.71809600 |
| C | -5.17757200 | 1.79276500  | -1.21339100 |
| H | -3.72577900 | 3.92734700  | -0.38171500 |
| H | -1.49598400 | 3.77803300  | 0.76122200  |
| C | -5.80917700 | 0.61676600  | -1.55080900 |
| C | -5.17525800 | -0.62340800 | -1.28685100 |
| H | -5.65482100 | 2.75200900  | -1.39119800 |
| H | -6.79420000 | 0.63401600  | -2.00625800 |
| H | -5.68626700 | -1.54942600 | -1.53177600 |
| N | -1.97880100 | 0.47009300  | 0.19011700  |
| C | 0.39295900  | -0.54395700 | -1.24051600 |
| O | 1.44137900  | -1.33946100 | -1.74089400 |
| O | 0.15692800  | 0.47283800  | -1.87949200 |
| H | 1.72272300  | -0.92667100 | -2.58239800 |
| C | 4.94968600  | 0.79807500  | -0.95117700 |
| C | 4.94243400  | -0.72646700 | -0.97896000 |
| F | 5.06261500  | 1.29429000  | 0.30631800  |
| F | 5.99350700  | 1.28849700  | -1.66907000 |
| F | 3.81666000  | 1.32998700  | -1.47870600 |
| O | 3.88824700  | -1.25757900 | -0.21274000 |
| H | 3.07128900  | -1.30542100 | -0.74783000 |
| H | 4.90597000  | -1.03695500 | -2.02921300 |
| H | 5.88951900  | -1.06203200 | -0.54795900 |

#### TS10\_11

|    |             |            |             |
|----|-------------|------------|-------------|
| Mn | 1.02044100  | 1.59440900 | -0.13940000 |
| N  | -0.58437400 | 1.38027000 | 1.11809000  |
| C  | -0.77077900 | 0.21286600 | 1.61686800  |

|   |             |             |             |
|---|-------------|-------------|-------------|
| C | 2.43885900  | 1.80661700  | -1.25654300 |
| O | 3.31451600  | 2.03961900  | -1.97390000 |
| C | 2.04786600  | 2.10147300  | 1.30806800  |
| C | 0.52673200  | 3.32215500  | -0.50560800 |
| O | 2.69019000  | 2.40019900  | 2.21353900  |
| O | 0.25380400  | 4.41937000  | -0.70002400 |
| O | -1.79254100 | 0.03244800  | 2.44746800  |
| C | -2.57998100 | 1.28101700  | 2.37946300  |
| C | -1.64797900 | 2.26382100  | 1.63371400  |
| H | -2.81334100 | 1.56435600  | 3.40636200  |
| H | -3.46542600 | 1.04500500  | 1.78777800  |
| H | -2.14272500 | 2.74996100  | 0.79027400  |
| H | -1.19899000 | 3.02168800  | 2.28818100  |
| C | 0.14044100  | -0.88618100 | 1.29511900  |
| C | 2.07438300  | -1.53259900 | 0.18309300  |
| C | 1.89673000  | -2.88401900 | 0.64266800  |
| C | 0.77738100  | -3.18422800 | 1.45387400  |
| C | -0.09991900 | -2.18412900 | 1.79073900  |
| H | 3.37773500  | -0.23355200 | -0.95192000 |
| C | 3.21431500  | -1.24288500 | -0.61047500 |
| C | 2.84181100  | -3.87977300 | 0.27705800  |
| H | 0.62216200  | -4.20278400 | 1.79794000  |
| H | -0.98086900 | -2.35702800 | 2.39656500  |
| C | 3.93088400  | -3.56455400 | -0.50290100 |
| C | 4.11546100  | -2.23125500 | -0.94292100 |
| H | 2.68467300  | -4.89576100 | 0.62821100  |
| H | 4.64863200  | -4.33038600 | -0.77971800 |
| H | 4.97865600  | -1.98088300 | -1.55210400 |
| N | 1.17172800  | -0.54571300 | 0.51028300  |
| C | 0.00376000  | 0.89662800  | -1.68314400 |
| O | -1.97673000 | 2.22399400  | -1.42984600 |
| O | -0.24589700 | 0.31890300  | -2.63788500 |
| H | -2.38482100 | 2.57729600  | -2.23013100 |
| C | -3.28864700 | -1.84633300 | -0.89083300 |
| C | -3.85409200 | -0.45768200 | -1.19411600 |
| F | -3.53315000 | -2.25521900 | 0.38436000  |
| F | -3.82043600 | -2.79900000 | -1.71015000 |
| F | -1.93405600 | -1.91514800 | -1.05338000 |
| O | -3.33131800 | 0.51331600  | -0.38017500 |
| H | -2.65901400 | 1.40774200  | -0.99376000 |
| H | -3.64892700 | -0.29959200 | -2.27180600 |
| H | -4.95102900 | -0.57234200 | -1.09508300 |

|    |             |             |             |
|----|-------------|-------------|-------------|
| Mn | 1.03400800  | -0.90852900 | -0.00008700 |
| N  | 1.81364500  | 0.99244200  | 0.00035600  |
| C  | 0.95826800  | 1.95177200  | 0.00030000  |
| C  | 0.37301600  | -2.61792200 | -0.00065100 |
| O  | 0.07127200  | -3.72887600 | -0.00102200 |
| C  | 0.97889000  | -0.85370500 | 1.88794000  |
| C  | 2.71419400  | -1.62332600 | -0.00006900 |
| O  | 0.93343600  | -0.80859700 | 3.02884400  |
| O  | 3.78020500  | -2.05146900 | -0.00005600 |
| O  | 1.41742200  | 3.20090700  | 0.00091600  |
| C  | 2.88874300  | 3.10325800  | -0.00178700 |
| C  | 3.16684000  | 1.57947500  | 0.00261700  |
| H  | 3.24511000  | 3.61725900  | 0.89055000  |
| H  | 3.24117500  | 3.61093800  | -0.89936200 |
| H  | 3.71720200  | 1.25041800  | -0.88252400 |
| H  | 3.71186100  | 1.25433400  | 0.89258200  |
| C  | -0.47878400 | 1.67578800  | 0.00001000  |
| C  | -2.13007900 | 0.03884200  | -0.00005000 |
| C  | -3.14557500 | 1.06126700  | -0.00002800 |
| C  | -2.75018300 | 2.41693200  | -0.00005700 |
| C  | -1.41121500 | 2.72984300  | -0.00005400 |
| H  | -1.81740200 | -2.10349900 | -0.00004900 |
| C  | -2.55168600 | -1.31559900 | -0.00003300 |
| C  | -4.51822600 | 0.69167000  | 0.00003900  |
| H  | -3.50538600 | 3.19664300  | -0.00006900 |
| H  | -1.05680100 | 3.75312100  | -0.00007500 |
| C  | -4.88820800 | -0.63341100 | 0.00007800  |
| C  | -3.89097800 | -1.64045400 | 0.00003700  |
| H  | -5.26499200 | 1.47982700  | 0.00007000  |
| H  | -5.93708700 | -0.91143400 | 0.00014600  |
| H  | -4.18379900 | -2.68562900 | 0.00006700  |
| N  | -0.79384100 | 0.37035500  | -0.00000600 |
| C  | 0.97948600  | -0.85265100 | -1.88812100 |
| O  | 0.93444700  | -0.80684200 | -3.02901100 |
